# Supplementary material for: Ru(ii)-Catalyzed C–H activation/annulation reactions of N-aryl-pyrazolidinones with sulfoxonium ylides: synthesis of cinnoline-fused pyrazolidinones
Source: Royal Society of Chemistry journal article supplement (doi:10.1039/d1qo01001h), 2021-01-01
Supplement: d1qo01001h1.pdf [file d1qo01001h1.pdf]

# Electronic Supplementary Information

## **Ru(II)-catalyzed C-H activation/annulation reactions of *N*-aryl- pyrazolidinones with sulfoxonium ylides: synthesis of cinnoline-fused pyrazolidinones**

Hai-Shan Jin,<sup>‡</sup> Ya-Zhen Du,<sup>‡</sup> Qing-Yang Zhao, and Li-Ming Zhao\*

*School of Chemistry and Materials Science, Jiangsu Normal University, Xuzhou*

*221116, Jiangsu, China*

[lmzhao@jsnu.edu.cn](mailto:lmzhao@jsnu.edu.cn)

## Table of Contents

|                                                                                           |         |
|-------------------------------------------------------------------------------------------|---------|
| 1. General Methods.....                                                                   | S2      |
| 2. General Procedure for the Synthesis of Product <b>3</b> and Characterization Data..... | S2-S16  |
| 3. Gram-Scale Synthesis of <b>3aa</b> .....                                               | S16     |
| 4. Procedure for the Synthesis of Compound <b>4</b> and Characterization Data.....        | S16-S17 |
| 5. Procedure for the Synthesis of Compound <b>5</b> and Characterization Data.....        | S17-S18 |
| 6. H/D Exchange Experiments.....                                                          | S18-S19 |
| 7. References.....                                                                        | S20     |
| 8. Copies of <sup>1</sup> H and <sup>13</sup> C NMR Spectra for Compounds <b>3</b> .....  | S21-S60 |
| 9. Copies of <sup>1</sup> H and <sup>13</sup> C NMR Spectra for Compound <b>4</b> .....   | S61     |
| 10. Copies of <sup>1</sup> H and <sup>13</sup> C NMR Spectra for Compound <b>5</b> .....  | S62     |
| 11. Crystal Structure of Compound <b>3la</b> .....                                        | S63     |

**1. General Methods.** Solvents and reagents were used as purchased without further purification. Reactions were carried out under air in sealed tubes. Temperatures quoted are external. Reaction progress was monitored by thin-layer chromatography (TLC) on silica gel GF<sub>254</sub> precoated plates. Visualization of developed plates was performed under a UV lamp. Chromatographic purification was performed on silica gel columns (100-200 mesh size). Melting points were uncorrected. <sup>1</sup>H NMR and <sup>13</sup>C NMR spectra were recorded at 400 and 100 MHz in CDCl<sub>3</sub> with chemical shift (δ) given in parts per million (ppm) relative to tetramethylsilane (TMS) as the internal standard. Multiplicities were indicated as followed: s (singlet), d (doublet), t (triplet), m (multiplet), dd (doublet of doublets), and so forth; the coupling constant (*J*) was given in hertz (Hz). High-resolution mass spectra (HRMS) were recorded on a Q-Exactive Focus Orbitrap mass spectrometer. *N*-arylpiperazin-3-ones **1** and sulfoxonium ylides **2** were prepared according to literature procedures.<sup>1,2</sup>

**2. General Procedure for the Synthesis of Product 3.** To a solution of *N*-arylpiperazin-3-ones **1** (0.3 mmol, 1.0 equiv) and sulfoxonium ylides **2** (0.45 mmol, 1.5 equiv) in DCE (2 mL) were added [RuCl<sub>2</sub>(*p*-cymene)]<sub>2</sub> (18.4 mg, 0.03 mmol) and Zn(OTf)<sub>2</sub> (109 mg, 0.3 mmol). The reaction mixture was stirred at 100 °C on a heating block for 10 min. After cooling to room temperature, the solvent was removed in vacuo and the residue was purified using column chromatography to afford product **3**.

*5-Phenyl-1, 2-dihydro-3H-pyrazolo[1, 2-a]cinnolin-3-one (3aa)*. Yellow solid (75 mg, 95% yield), ethyl acetate/petroleum ether = 1:4. mp 158-159 °C. <sup>1</sup>H NMR (400 MHz, CDCl<sub>3</sub>) δ: 7.50 (d, *J* = 7.6 Hz, 2H), 7.40-7.30 (m, 3H), 7.15 (t, *J* = 7.8 Hz, 1H), 7.04 (d, *J* = 7.2 Hz, 1H), 6.90 (t, *J* = 7.4 Hz, 1H), 6.70 (d, *J* = 8.0 Hz, 1H), 6.45 (s, 1H), 3.96 (t, *J* = 7.8 Hz, 2H), 2.67 (t, *J* =

7.8 Hz, 2H).  $^{13}\text{C}$  NMR (100 MHz,  $\text{CDCl}_3$ )  $\delta$ : 170.2, 146.5, 137.3, 133.0, 129.3, 128.9, 128.4, 126.7, 126.1, 125.0, 122.6, 115.5, 111.2, 45.5, 30.8. HRMS (ESI)  $m/z$ :  $[\text{M} + \text{H}]^+$  calcd for  $\text{C}_{17}\text{H}_{15}\text{N}_2\text{O}$  263.1184; found 263.1175.

*8-Fluoro-5-phenyl-1, 2-dihydro-3H-pyrazolo[1, 2-a]cinnolin-3-one (3ba)*. Yellow solid (78 mg, 93% yield), ethyl acetate/petroleum ether = 1:4. mp 152-153  $^{\circ}\text{C}$ .  $^1\text{H}$  NMR (400 MHz,  $\text{CDCl}_3$ )  $\delta$ : 7.51-7.49 (m, 2H), 7.41-7.34 (m, 3H), 6.84 (td  $J = 8.4$  Hz,  $J = 2.8$  Hz, 1H), 6.78 (dd,  $J = 8.4$  Hz,  $J = 2.8$  Hz, 1H), 6.64 (dd,  $J = 8.8$  Hz,  $J = 4.4$  Hz, 1H), 6.36 (s, 1H), 3.94 (t,  $J = 7.8$  Hz, 2H), 2.68 (t,  $J = 7.8$  Hz, 2H).  $^{13}\text{C}$  NMR (100 MHz,  $\text{CDCl}_3$ )  $\delta$ : 170.3, 158.7 ( $J = 239.9$  Hz), 142.6 ( $J = 2.5$  Hz), 138.8, 132.7, 129.4, 128.6, 126.9 ( $J = 8.3$  Hz), 126.4, 115.0 ( $J = 22.8$  Hz), 114.5 ( $J = 2.5$  Hz), 113.4 ( $J = 23.6$  Hz), 112.4 ( $J = 8.2$  Hz), 45.9, 30.8. HRMS (ESI)  $m/z$ :  $[\text{M} - \text{H}]^-$  calcd for  $\text{C}_{17}\text{H}_{12}\text{FN}_2\text{O}$  279.0934; found 279.0925.

*8-Chloro-5-phenyl-1, 2-dihydro-3H-pyrazolo[1, 2-a]cinnolin-3-one (3ca)*. Yellow solid (80 mg, 90% yield), ethyl acetate/petroleum ether = 1:4. mp 162-163  $^{\circ}\text{C}$ .  $^1\text{H}$  NMR (400 MHz,  $\text{CDCl}_3$ )  $\delta$ : 7.49 (d,  $J = 8.0$  Hz, 2H), 7.41-7.36 (m, 3H), 7.10 (dd,  $J = 8.4$  Hz,  $J = 2.4$  Hz, 1H), 7.01 (d,  $J = 2.4$  Hz, 1H), 6.62 (d,  $J = 8.4$  Hz, 1H), 6.34 (s, 1H), 3.94 (t,  $J = 7.8$  Hz, 2H), 2.68 (t,  $J = 8.0$  Hz, 2H).  $^{13}\text{C}$  NMR (100 MHz,  $\text{CDCl}_3$ )  $\delta$ : 170.0, 145.1, 138.7, 132.7, 129.4, 128.6, 128.6, 127.9, 126.7, 126.4, 126.2, 114.2, 112.5, 45.8, 30.8. HRMS (ESI)  $m/z$ :  $[\text{M} + \text{H}]^+$  calcd for  $\text{C}_{17}\text{H}_{14}\text{ClN}_2\text{O}$  297.0795; found 297.0783.

*8-Bromo-5-phenyl-1, 2-dihydro-3H-pyrazolo[1, 2-a]cinnolin-3-one (3da)*. Yellow solid (101 mg, 99% yield), ethyl acetate/petroleum ether = 1:4. mp 150-151  $^{\circ}\text{C}$ .  $^1\text{H}$  NMR (400 MHz,  $\text{CDCl}_3$ )  $\delta$ : 7.48 (dd,  $J = 8.0$  Hz,  $J = 1.6$  Hz, 2H), 7.41-7.34 (m, 3H), 7.25-7.22 (m, 1H), 7.14 (s, 1H), 6.55 (dd,  $J = 8.4$  Hz,  $J = 3.2$  Hz, 1H), 6.32 (s, 1H), 3.94-3.89 (m, 2H), 2.69-2.65 (m, 2H).

$^{13}\text{C}$  NMR (100 MHz,  $\text{CDCl}_3$ )  $\delta$ : 170.0, 145.6, 138.6, 132.7, 131.6, 129.4, 129.0, 128.6, 127.1, 126.4, 115.2, 114.1, 112.9, 45.7, 30.8. HRMS (ESI)  $m/z$ :  $[\text{M} + \text{H}]^+$  calcd for  $\text{C}_{17}\text{H}_{14}\text{BrN}_2\text{O}$  341.0290; found 341.0277.

*8-Methyl-5-phenyl-1, 2-dihydro-3H-pyrazolo[1, 2-a]cinnolin-3-one (3ea)*. Yellow solid (75 mg, 91% yield), ethyl acetate/petroleum ether = 1:4. mp 161-162 °C.  $^1\text{H}$  NMR (400 MHz,  $\text{CDCl}_3$ )  $\delta$ : 7.51 (d,  $J = 7.2$  Hz, 2H), 7.40-7.31 (m, 3H), 6.97 (d,  $J = 8.0$  Hz, 1H), 6.89 (s, 1H), 6.62 (d,  $J = 8.4$  Hz, 2H), 6.43 (s, 1H), 3.95 (t,  $J = 8.0$  Hz, 2H), 2.67 (t,  $J = 7.8$  Hz, 2H), 2.26 (s, 3H).  $^{13}\text{C}$  NMR (100 MHz,  $\text{CDCl}_3$ )  $\delta$ : 170.5, 144.2, 137.3, 133.2, 132.2, 129.7, 128.9, 128.5, 127.5, 126.2, 125.1, 115.7, 111.3, 45.7, 30.9, 20.6. HRMS (ESI)  $m/z$ :  $[\text{M} - \text{H}]^-$  calcd for  $\text{C}_{18}\text{H}_{15}\text{N}_2\text{O}$  275.1184; found 275.1171.

*8-Methoxy-5-phenyl-1, 2-dihydro-3H-pyrazolo[1, 2-a]cinnolin-3-one (3fa)*. Yellow solid (63 mg, 72% yield), ethyl acetate/petroleum ether = 1:4. mp 138-139 °C.  $^1\text{H}$  NMR (400 MHz,  $\text{CDCl}_3$ )  $\delta$ : 7.52 (d,  $J = 7.6$  Hz, 2H), 7.40-7.33 (m, 3H), 6.71 (dd,  $J = 8.4$  Hz,  $J = 2.4$  Hz, 1H), 6.67-6.65 (m, 2H), 6.43 (s, 1H), 3.95 (t,  $J = 7.8$  Hz, 2H), 3.78 (s, 3H), 2.69 (t,  $J = 7.8$  Hz, 2H).  $^{13}\text{C}$  NMR (100 MHz,  $\text{CDCl}_3$ )  $\delta$ : 170.6, 155.5, 140.1, 138.1, 133.1, 129.1, 128.5, 126.4, 126.3, 115.3, 113.7, 112.7, 112.3, 55.7, 45.9, 30.9. HRMS (ESI)  $m/z$ :  $[\text{M} - \text{H}]^-$  calcd for  $\text{C}_{18}\text{H}_{15}\text{N}_2\text{O}_2$  291.1134; found 291.1120.

*3-Oxo-5-phenyl-2,3-dihydro-1H-pyrazolo[1,2-a]cinnoline-8-carbonitrile (3ga)*. Yellow solid (58 mg, 67% yield), ethyl acetate/petroleum ether = 1:4. mp 208-209 °C.  $^1\text{H}$  NMR (400 MHz,  $\text{CDCl}_3$ )  $\delta$  7.47-7.45 (m, 2H), 7.41-7.39 (m, 4H), 7.19 (s, 1H), 6.65 (d,  $J = 8.4$  Hz, 1H), 6.25 (s, 1H), 3.95 (t,  $J = 8.0$  Hz, 2H), 2.71 (t,  $J = 8.0$  Hz, 2H).  $^{13}\text{C}$  NMR (100 MHz,  $\text{CDCl}_3$ )  $\delta$  168.8, 150.3, 139.1, 133.6, 132.3, 129.7, 129.1, 128.6, 126.4, 125.5, 118.8, 113.5, 111.2, 105.5,

45.5, 30.6. HRMS (ESI) m/z: [M + H]<sup>+</sup> calcd for C<sub>18</sub>H<sub>14</sub>N<sub>3</sub>O 288.1137; found 288.1124.

*5-Phenyl-8-(trifluoromethyl)-1, 2-dihydro-3H-pyrazolo[1, 2-a]cinnolin-3-one (3ha)*.

Yellow solid (84 mg, 85% yield), ethyl acetate/petroleum ether = 1:4. mp 153-154 °C. <sup>1</sup>H NMR (400 MHz, CDCl<sub>3</sub>) δ: 7.49-7.47 (m, 2H), 7.41-7.34 (m, 4H), 7.23 (s, 1H), 6.70 (d, *J* = 8.4 Hz, 1H), 6.35 (s, 1H), 3.95 (t, *J* = 8.0 Hz, 2H), 2.68 (t, *J* = 7.8 Hz, 2H). <sup>13</sup>C NMR (100 MHz, CDCl<sub>3</sub>) δ: 169.5, 149.4, 138.7, 132.6, 129.5, 128.6, 126.4, 126.4 (q, *J* = 4.0 Hz), 125.3, 124.7 (q, *J* = 32.0 Hz), 124.1 (q, *J* = 270.0 Hz), 123.2 (q, *J* = 3.8 Hz), 114.3, 111.0, 45.6, 30.7. HRMS (ESI) m/z: [M + Na]<sup>+</sup> calcd for C<sub>18</sub>H<sub>13</sub>F<sub>3</sub>N<sub>2</sub>NaO 353.0878; found 353.0863.

*10-Chloro-5-phenyl-1, 2-dihydro-3H-pyrazolo[1, 2-a]cinnolin-3-one (3ia)*. Yellow solid

(63 mg, 71% yield), ethyl acetate/petroleum ether = 1:4. mp 70-71 °C. <sup>1</sup>H NMR (400 MHz, CDCl<sub>3</sub>) δ: 7.43 (d, *J* = 7.2 Hz, 2H), 7.39-7.33 (m, 3H), 7.09 (d, *J* = 8.0 Hz, 1H), 6.88 (d, *J* = 7.2 Hz, 1H), 6.80 (t, *J* = 7.6 Hz, 2H), 6.24 (s, 1H), 4.52 (t, *J* = 8.2 Hz, 2H), 2.70 (t, *J* = 8.2 Hz, 2H). <sup>13</sup>C NMR (100 MHz, CDCl<sub>3</sub>) δ: 168.8, 146.0, 137.2, 132.9, 132.0, 129.0, 128.5, 127.0, 126.0, 125.6, 117.8, 116.7, 49.8, 30.6. HRMS (ESI) m/z: [M + H]<sup>+</sup> calcd for C<sub>17</sub>H<sub>14</sub>ClN<sub>2</sub>O 297.0795; found 297.0782.

*10-Methyl-5-phenyl-1, 2-dihydro-3H-pyrazolo[1, 2-a]cinnolin-3-one (3ja)*. Yellow solid

(67 mg, 81% yield), ethyl acetate/petroleum ether = 1:4. mp 118-119 °C. <sup>1</sup>H NMR (400 MHz, CDCl<sub>3</sub>) δ: 7.43 (d, *J* = 7.2 Hz, 2H), 7.38-7.29 (m, 3H), 6.92 (d, *J* = 7.6 Hz, 1H), 6.85 (d, *J* = 6.4 Hz, 1H), 6.80 (t, *J* = 7.2 Hz, 1H), 6.26 (s, 1H), 4.11 (t, *J* = 8.4 Hz, 2H), 2.68 (t, *J* = 8.4 Hz, 2H), 2.36 (s, 3H). <sup>13</sup>C NMR (100 MHz, CDCl<sub>3</sub>) δ: 167.9, 149.2, 135.8, 133.6, 133.4, 128.6, 128.4, 125.8, 125.2, 124.5, 122.8, 122.1, 118.1, 50.7, 30.4, 22.2. HRMS (ESI) m/z: [M + H]<sup>+</sup> calcd for C<sub>18</sub>H<sub>17</sub>N<sub>2</sub>O 277.1341; found 277.1329.

*9-Chloro-5-phenyl-1, 2-dihydro-3H-pyrazolo[1, 2-a]cinnolin-3-one (3ka)*. Yellow solid (66 mg, 74% yield), ethyl acetate/petroleum ether = 1:4. mp 196-197 °C. <sup>1</sup>H NMR (400 MHz, CDCl<sub>3</sub>) δ: 7.50-7.48 (m, 2H), 7.40-7.33 (m, 2H), 6.95 (d, *J* = 8.0 Hz, 1H), 6.87 (dd, *J* = 8.0 Hz, *J* = 1.6 Hz, 1H), 6.69 (s, 1H), 6.38 (s, 1H), 3.93 (t, *J* = 7.8 Hz, 2H), 2.68 (t, *J* = 7.8 Hz, 2H). <sup>13</sup>C NMR (100 MHz, CDCl<sub>3</sub>) δ: 170.0, 147.7, 137.5, 134.7, 132.8, 129.2, 128.6, 127.5, 176.2, 123.6, 122.6, 114.6, 111.8, 45.7, 30.7. HRMS (ESI) *m/z*: [M + H]<sup>+</sup> calcd for C<sub>17</sub>H<sub>14</sub>ClN<sub>2</sub>O 297.0795; found 297.0783.

*9-Methyl-5-phenyl-1, 2-dihydro-3H-pyrazolo[1, 2-a]cinnolin-3-one (3la)*. Yellow solid (68 mg, 82% yield), ethyl acetate/petroleum ether = 1:4. mp 190-191 °C. <sup>1</sup>H NMR (400 MHz, CDCl<sub>3</sub>) δ: 7.50 (d, *J* = 7.6 Hz, 2H), 7.39-7.30 (m, 3H), 6.95 (d, *J* = 7.6 Hz, 1H), 6.72 (d, *J* = 7.6 Hz, 1H), 6.54 (s, 1H), 6.45 (s, 1H), 3.97 (t, *J* = 7.8 Hz, 2H), 2.67 (t, *J* = 7.8 Hz, 2H), 2.32 (s, 3H). <sup>13</sup>C NMR (100 MHz, CDCl<sub>3</sub>) δ: 170.4, 146.6, 139.7, 136.3, 133.3, 128.8, 128.5, 126.8, 126.1, 123.3, 122.4, 115.8, 112.2, 45.6, 30.8, 22.0. HRMS (ESI) *m/z*: [M + H]<sup>+</sup> calcd for C<sub>18</sub>H<sub>17</sub>N<sub>2</sub>O 277.1341; found 277.1330.

*7, 10-Dimethyl-5-phenyl-1, 2-dihydro-3H-pyrazolo[1, 2-a]cinnolin-3-one (3ma)*. Yellow solid (44 mg, 51% yield), ethyl acetate/petroleum ether = 1:4. mp 180-181 °C. <sup>1</sup>H NMR (400 MHz, CDCl<sub>3</sub>) δ: 7.45 (d, *J* = 7.2 Hz, 2H), 7.38-7.29 (m, 3H), 6.82 (d, *J* = 7.6 Hz, 1H), 6.65 (d, *J* = 7.6 Hz, 1H), 6.42 (s, 1H), 4.09 (t, *J* = 8.4 Hz, 2H), 2.68 (t, *J* = 8.2 Hz, 2H), 2.32 (s, 3H), 2.28 (s, 3H). <sup>13</sup>C NMR (100 MHz, CDCl<sub>3</sub>) δ: 168.0, 150.1, 135.4, 133.6, 133.1, 132.4, 128.6, 128.4, 125.9, 124.1, 123.1, 119.6, 115.9, 50.8, 30.3, 22.0, 19.3. HRMS (ESI) *m/z*: [M + Na]<sup>+</sup> calcd for C<sub>19</sub>H<sub>18</sub>N<sub>2</sub>NaO 313.1317; found 313.1303.

*8-Chloro-10-fluoro-5-phenyl-1, 2-dihydro-3H-pyrazolo[1, 2-a]cinnolin-3-one (3na)*.

Yellow solid (79 mg, 84% yield), ethyl acetate/petroleum ether = 1:4. mp 168-169 °C. <sup>1</sup>H NMR (400 MHz, CDCl<sub>3</sub>) δ: 7.47-7.45 (m, 2H), 7.41-7.37 (m, 3H), 6.89 (dd, *J* = 12.8 Hz, *J* = 2.0 Hz, 1H), 6.81 (s, 1H), 6.28 (s, 1H), 4.23 (t, *J* = 7.8 Hz, 2H), 2.69 (t, *J* = 7.8 Hz, 2H). <sup>13</sup>C NMR (100 MHz, CDCl<sub>3</sub>) δ: 170.3, 148.7 (*J* = 244.0 Hz), 139.3, 132.7 (*J* = 8.1 Hz), 132.5, 129.6 (*J* = 2.4 Hz), 128.8 (*J* = 4.1 Hz), 128.6 (*J* = 2.3 Hz), 127.9 (*J* = 11.0 Hz), 126.3 (*J* = 2.1 Hz), 122.2 (*J* = 3.2 Hz), 117.2 (*J* = 26.7 Hz), 114.0 (*J* = 4.2 Hz), 48.3 (*J* = 15.0 Hz), 31.2. HRMS (ESI) *m/z*: [M + H]<sup>+</sup> calcd for C<sub>17</sub>H<sub>13</sub>ClFN<sub>2</sub>O 315.0700; found 315.0687.

*5-(4-Fluorophenyl)-1, 2-dihydro-3H-pyrazolo[1, 2-a]cinnolin-3-one (3ab)*. Yellow solid (66 mg, 78% yield), ethyl acetate/petroleum ether = 1:4. mp 141-142 °C. <sup>1</sup>H NMR (400 MHz, CDCl<sub>3</sub>) δ: 7.49-7.46 (m, 2H), 7.16 (t, *J* = 7.8 Hz, 1H), 7.08-7.02 (m, 3H), 6.90 (t, *J* = 7.4 Hz, 1H), 6.70 (d, *J* = 8.0 Hz, 1H), 6.37 (s, 1H), 3.96 (t, *J* = 7.8 Hz, 2H), 2.67 (t, *J* = 7.8 Hz, 2H). <sup>13</sup>C NMR (100 MHz, CDCl<sub>3</sub>) δ: 170.2, 163.1 (*J* = 247.3 Hz), 146.4, 136.4, 129.4, 129.3 (*J* = 3.3 Hz), 128.0 (*J* = 8.2 Hz), 126.6, 124.9, 122.7, 115.5 (*J* = 21.8 Hz), 115.2 (*J* = 1.6 Hz), 111.2, 45.6, 30.7. HRMS (ESI) *m/z*: [M + H]<sup>+</sup> calcd for C<sub>17</sub>H<sub>14</sub>FN<sub>2</sub>O 281.1090; found 281.1079.

*5-(4-Chlorophenyl)-1, 2-dihydro-3H-pyrazolo[1, 2-a]cinnolin-3-one (3ac)*. Yellow solid (75 mg, 84% yield), ethyl acetate/petroleum ether = 1:4. mp 189-190 °C. <sup>1</sup>H NMR (400 MHz, CDCl<sub>3</sub>) δ: 7.43 (d, *J* = 8.4 Hz, 2H), 7.34 (d, *J* = 8.4 Hz, 2H), 7.18 (t, *J* = 7.8 Hz, 1H), 7.05 (d, *J* = 7.6 Hz, 1H), 6.91 (t, *J* = 7.4 Hz, 1H), 6.72 (d, *J* = 8.4 Hz, 1H), 6.44 (s, 1H), 3.98 (t, *J* = 8.0 Hz, 2H), 2.67 (t, *J* = 7.8 Hz, 2H). <sup>13</sup>C NMR (100 MHz, CDCl<sub>3</sub>) δ: 170.5, 146.5, 136.2, 134.7, 131.6, 129.6, 128.8, 127.5, 126.9, 124.8, 122.8, 116.0, 111.3, 45.6, 30.7. HRMS (ESI) *m/z*: [M + H]<sup>+</sup> calcd for C<sub>17</sub>H<sub>14</sub>ClN<sub>2</sub>O 297.0795; found 297.0785.

*5-(4-Bromophenyl)-1, 2-dihydro-3H-pyrazolo[1, 2-a]cinnolin-3-one (3ad)*. Yellow solid



(97 mg, 95% yield), ethyl acetate/petroleum ether = 1:4. mp 139-140 °C. <sup>1</sup>H NMR (400 MHz, CDCl<sub>3</sub>) δ: 7.50 (d, *J* = 8.4 Hz, 2H), 7.37 (d, *J* = 8.4 Hz, 2H), 7.18 (t, *J* = 7.6 Hz, 1H), 7.05 (d, *J* = 7.6, 1H), 6.92 (t, *J* = 7.4, 1H), 6.72 (d, *J* = 8.0, 1H), 6.45 (s, 1H), 3.98 (t, *J* = 8.0, 2H), 2.67 (t, *J* = 8.0, 2H). <sup>13</sup>C NMR (100 MHz, CDCl<sub>3</sub>) δ: 168.9, 150.3, 139.1, 133.7, 132.3, 129.7, 129.1, 128.6, 126.4, 125.5, 118.9, 113.5, 111.2, 45.5, 30.6. HRMS (ESI) *m/z*: [M + H]<sup>+</sup> calcd for C<sub>17</sub>H<sub>14</sub>BrN<sub>2</sub>O 341.0290; found 341.0275.

*5-(4-(Trifluoromethyl)phenyl)-1, 2-dihydro-3H-pyrazolo[1, 2-a]cinnolin-3-one (3ae)*.

Yellow solid (90 mg, 91% yield), ethyl acetate/petroleum ether = 1:4. mp 182-183 °C. <sup>1</sup>H NMR (400 MHz, CDCl<sub>3</sub>) δ: 7.63 (d, *J* = 8.8 Hz, 2H), 7.59 (d, *J* = 8.8 Hz, 2H), 7.20 (t, *J* = 7.6 Hz, 1H), 7.07 (d, *J* = 7.2 Hz, 1H), 6.93 (d, *J* = 7.6 Hz, 1H), 6.73 (d, *J* = 8.0 Hz, 1H), 6.53 (s, 1H), 3.99 (t, *J* = 7.8 Hz, 2H), 2.69 (t, *J* = 7.8 Hz, 2H). <sup>13</sup>C NMR (100 MHz, CDCl<sub>3</sub>) δ: 170.5, 146.8, 136.6 (*J* = 2.0 Hz), 135.8, 130.5 (q, *J* = 32.6 Hz), 130.1, 127.2, 126.4, 125.5 (q, *J* = 3.8 Hz), 124.5, 124.2 (q, *J* = 270.1 Hz), 117.6, 111.4, 45.8, 30.6. HRMS (ESI) *m/z*: [M + H]<sup>+</sup> calcd for C<sub>18</sub>H<sub>14</sub>F<sub>3</sub>N<sub>2</sub>O 331.1058; found 331.1048.

*4-(3-Oxo-2, 3-dihydro-1H-pyrazolo[1, 2-a]cinnolin-5-yl)benzotrile (3af)*. Yellow solid (68 mg, 79% yield), ethyl acetate/petroleum ether = 1:4. mp 206-207 °C. <sup>1</sup>H NMR (400 MHz, CDCl<sub>3</sub>) δ: 7.65 (d, *J* = 8.4 Hz, 2H), 7.58 (d, *J* = 8.4 Hz, 2H), 7.23 (t, *J* = 7.8 Hz, 1H), 7.09 (d, *J* = 7.2 Hz, 1H), 6.94 (t, *J* = 7.6 Hz, 1H), 6.75 (d, *J* = 8.0 Hz, 1H), 6.58 (s, 1H), 4.01 (t, *J* = 7.8 Hz, 2H), 2.69 (t, *J* = 7.8 Hz, 2H). <sup>13</sup>C NMR (100 MHz, CDCl<sub>3</sub>) δ: 170.8, 146.8, 137.6, 135.3, 132.3, 130.5, 127.5, 126.6, 124.3, 122.9, 118.9, 118.6, 112.0, 111.5, 45.8, 30.5. HRMS (ESI) *m/z*: [M + H]<sup>+</sup> calcd for C<sub>18</sub>H<sub>14</sub>N<sub>3</sub>O 288.1137; found 288.1126.

*5-(4-Nitrophenyl)-1, 2-dihydro-3H-pyrazolo[1, 2-a]cinnolin-3-one (3ag)*. Orange solid

(58 mg, 63% yield), ethyl acetate/petroleum ether = 1:4. mp 190-191 °C. <sup>1</sup>H NMR (400 MHz, CDCl<sub>3</sub>) δ: 8.22 (d, *J* = 8.8 Hz, 2H), 7.63 (d, *J* = 8.8 Hz, 2H), 7.24 (t, *J* = 7.6 Hz, 1H), 7.10 (d, *J* = 7.2 Hz, 1H), 6.94 (t, *J* = 7.4 Hz, 1H), 6.75 (d, *J* = 8.0 Hz, 1H), 6.63 (s, 1H), 4.03 (t, *J* = 7.8 Hz, 2H), 2.71 (t, *J* = 7.8 Hz, 2H). <sup>13</sup>C NMR (100 MHz, CDCl<sub>3</sub>) δ: 170.8, 147.6, 146.8, 139.4, 134.9, 130.7, 127.6, 126.7, 124.1, 123.9, 122.9, 119.3, 111.6, 45.9, 30.5. HRMS (ESI) *m/z*: [M + H]<sup>+</sup> calcd for C<sub>17</sub>H<sub>14</sub>N<sub>3</sub>O<sub>3</sub> 308.1035; found 308.1024.

*5-(2-Bromophenyl)-1, 2-dihydro-3H-pyrazolo[1, 2-a]cinnolin-3-one (3ah)*. Yellow solid (91 mg, 89% yield), ethyl acetate/petroleum ether = 1:4. mp 177-178 °C. <sup>1</sup>H NMR (400 MHz, CDCl<sub>3</sub>) δ: 7.57 (d, *J* = 7.6 Hz, 1H), 7.38 (dd, *J* = 7.2 Hz, *J* = 1.8 Hz, 1H), 7.34 (t, *J* = 7.4 Hz, 1H), 7.23 (td, *J* = 8.0 Hz, *J* = 2.0 Hz, 1H), 7.11 (t, *J* = 7.6 Hz, 1H), 6.89 (d, *J* = 6.0 Hz, 1H), 6.85 (t, *J* = 7.4 Hz, 1H), 6.53 (d, *J* = 8.0 Hz, 1H), 5.83 (s, 1H), 3.71 (t, *J* = 8.4 Hz, 2H), 2.74 (t, *J* = 8.4 Hz, 2H). <sup>13</sup>C NMR (100 MHz, CDCl<sub>3</sub>) δ: 164.3, 148.0, 136.5, 134.7, 132.6, 130.7, 130.2, 129.6, 127.6, 125.8, 124.2, 123.0, 122.4, 116.6, 111.4, 47.5, 30.9. HRMS (ESI) *m/z*: [M - H]<sup>-</sup> calcd for C<sub>17</sub>H<sub>12</sub>BrN<sub>2</sub>O 339.0133; found 339.0121.

*5-(3-Bromophenyl)-1, 2-dihydro-3H-pyrazolo[1, 2-a]cinnolin-3-one (3ai)*. Yellow solid (94 mg, 92% yield), ethyl acetate/petroleum ether = 1:4. mp 151-152 °C. <sup>1</sup>H NMR (400 MHz, CDCl<sub>3</sub>) δ: 7.64 (s, 1H), 7.44 (t, *J* = 9.6 Hz, 2H), 7.24 (t, *J* = 7.8 Hz, 1H), 7.18 (t, *J* = 7.8 Hz, 1H), 7.05 (d, *J* = 7.2 Hz, 1H), 6.92 (t, *J* = 7.6 Hz, 1H), 6.72 (d, *J* = 8.0 Hz, 1H), 6.46 (s, 1H), 3.98 (t, *J* = 7.8 Hz, 2H), 2.67 (t, *J* = 7.8 Hz, 2H). <sup>13</sup>C NMR (100 MHz, CDCl<sub>3</sub>) δ: 170.7, 146.6, 132.8, 135.3, 131.8, 130.0, 129.8, 129.0, 127.1, 124.9, 124.7, 122.8, 122.7, 116.8, 111.4, 45.7, 30.7. HRMS (ESI) *m/z*: [M + H]<sup>+</sup> calcd for C<sub>17</sub>H<sub>14</sub>BrN<sub>2</sub>O 341.0290; found 341.0277.

*5-(4-Methoxyphenyl)-1, 2-dihydro-3H-pyrazolo[1, 2-a]cinnolin-3-one (3aj)*. Yellow solid

(74 mg, 85% yield), ethyl acetate/petroleum ether = 1:4. mp 170-171 °C. <sup>1</sup>H NMR (400 MHz, CDCl<sub>3</sub>) δ: 7.45 (d, *J* = 8.4 Hz, 2H), 7.14 (t, *J* = 7.6 Hz, 1H), 7.04 (d, *J* = 7.2 Hz, 1H), 6.92-6.88 (m, 3H), 6.71 (d, *J* = 8.0 Hz, 1H), 6.36 (s, 1H), 3.97 (t, *J* = 7.8 Hz, 2H), 3.82 (s, 3H), 2.67 (t, *J* = 7.8 Hz, 2H). <sup>13</sup>C NMR (100 MHz, CDCl<sub>3</sub>) δ: 170.5, 160.3, 146.3, 137.2, 128.9, 127.6, 126.5, 125.6, 125.5, 122.7, 114.0, 113.7, 111.2, 54.4, 45.4, 30.9. HRMS (ESI) *m/z*: [M + Na]<sup>+</sup> calcd for C<sub>18</sub>H<sub>16</sub>N<sub>2</sub>NaO<sub>2</sub> 315.1109; found 315.1093.

*5-(p-Tolyl)-1, 2-dihydro-3H-pyrazolo[1, 2-a]cinnolin-3-one (3ak)*. Yellow solid (77 mg, 93% yield), ethyl acetate/petroleum ether = 1:4. mp 150-151 °C. <sup>1</sup>H NMR (400 MHz, CDCl<sub>3</sub>) δ: 7.40 (d, *J* = 8.0 Hz, 2H), 7.18 (d, *J* = 8.0 Hz, 2H), 7.14 (t, *J* = 8.0 Hz, 1H), 7.03 (d, *J* = 7.2 Hz, 1H), 6.90 (t, *J* = 7.4 Hz, 1H), 6.70 (d, *J* = 8.0 Hz, 1H), 6.41 (s, 1H), 3.96 (t, *J* = 8.0 Hz, 2H), 2.67 (t, *J* = 7.8 Hz, 2H), 2.36 (s, 3H). <sup>13</sup>C NMR (100 MHz, CDCl<sub>3</sub>) δ: 170.3, 146.5, 139.1, 137.5, 130.3, 129.3, 129.1, 126.7, 126.2, 125.3, 122.7, 114.7, 111.2, 45.5, 30.9, 21.5. HRMS (ESI) *m/z*: [M - H]<sup>-</sup> calcd for C<sub>18</sub>H<sub>15</sub>N<sub>2</sub>O 275.1184; found 275.1171.

*5-(o-Tolyl)-1, 2-dihydro-3H-pyrazolo[1, 2-a]cinnolin-3-one (3al)*. Yellow solid (75 mg, 91% yield), ethyl acetate/petroleum ether = 1:4. mp 127-128 °C. <sup>1</sup>H NMR (400 MHz, CDCl<sub>3</sub>) δ 7.31-7.25 (m, 2H), 7.23-7.17 (m, 2H), 7.11 (t, *J* = 7.6 Hz, 1H), 6.89 (d, *J* = 7.2 Hz, 1H), 6.85 (t, *J* = 7.2 Hz, 1H), 6.54 (d, *J* = 8.0 Hz, 1H), 5.81 (s, 1H), 3.73 (t, *J* = 8.4 Hz, 2H), 2.68 (t, *J* = 8.2 Hz, 2H), 2.39 (s, 3H). <sup>13</sup>C NMR (100 MHz, CDCl<sub>3</sub>) δ: 164.9, 147.5, 137.5, 136.0, 133.7, 130.0, 129.2, 128.9, 128.9, 126.0, 125.6, 124.6, 122.9, 115.8, 111.2, 47.1, 31.0, 19.9. HRMS (ESI) *m/z*: [M - H]<sup>-</sup> calcd for C<sub>18</sub>H<sub>15</sub>N<sub>2</sub>O 275.1185; found 275.1172.

*5-(m-Tolyl)-1, 2-dihydro-3H-pyrazolo[1, 2-a]cinnolin-3-one (3am)*. Yellow solid (76 mg, 92% yield), ethyl acetate/petroleum ether = 1:4. mp 134-135 °C. <sup>1</sup>H NMR (400 MHz, CDCl<sub>3</sub>)

$\delta$ : 7.31 (d,  $J = 7.2$  Hz, 2H), 7.27 (t,  $J = 7.8$  Hz, 1H), 7.17-7.13 (m, 2H), 7.05 (d,  $J = 7.2$  Hz, 1H), 6.90 (t,  $J = 7.4$  Hz, 1H), 6.71 (d,  $J = 8.0$  Hz, 1H), 6.44 (s, 1H), 3.97 (t,  $J = 7.8$  Hz, 2H), 2.67 (t,  $J = 7.8$  Hz, 2H), 2.38 (s, 3H).  $^{13}\text{C}$  NMR (100 MHz,  $\text{CDCl}_3$ )  $\delta$ : 170.4, 146.6, 138.1, 137.5, 133.1, 129.9, 129.3, 128.4, 126.8, 125.2, 123.5, 122.7, 115.5, 111.3, 45.6, 30.9, 21.7. HRMS (ESI)  $m/z$ :  $[\text{M} + \text{H}]^+$  calcd for  $\text{C}_{18}\text{H}_{17}\text{N}_2\text{O}$  277.1341; found 277.1328.

*5-(Thiophen-2-yl)-1, 2-dihydro-3H-pyrazolo[1, 2-a]cinnolin-3-one (3an)*. Yellow solid (64 mg, 79% yield), ethyl acetate/petroleum ether = 1:4. mp 126-127 °C.  $^1\text{H}$  NMR (400 MHz,  $\text{CDCl}_3$ )  $\delta$ : 7.30 (d,  $J = 4.8$  Hz, 1H), 7.23 (d,  $J = 3.6$  Hz, 1H), 7.17 (t,  $J = 7.2$  Hz, 1H), 7.06 (d,  $J = 7.2$  Hz, 1H), 7.03 (t,  $J = 4.6$  Hz, 1H), 6.92 (t,  $J = 7.4$  Hz, 1H), 6.76 (d,  $J = 8.0$  Hz, 1H), 6.52 (s, 1H), 4.0 (t,  $J = 7.8$  Hz, 2H), 2.65 (t,  $J = 7.6$  Hz, 2H).  $^{13}\text{C}$  NMR (100 MHz,  $\text{CDCl}_3$ )  $\delta$ : 172.1, 146.1, 136.8, 132.0, 129.3, 127.7, 127.0, 126.4, 126.2, 125.1, 122.8, 114.7, 111.4, 45.2, 30.8. HRMS (ESI)  $m/z$ :  $[\text{M} + \text{H}]^+$  calcd for  $\text{C}_{15}\text{H}_{13}\text{N}_2\text{OS}$  269.0749; found 269.0736.

*5-Cyclohexyl-1, 2-dihydro-3H-pyrazolo[1, 2-a]cinnolin-3-one (3ao)*. Yellow solid (58 mg, 72% yield), ethyl acetate/petroleum ether = 1:4. mp 96-97 °C.  $^1\text{H}$  NMR (400 MHz,  $\text{CDCl}_3$ )  $\delta$ : 7.07-7.01 (m, 1H), 6.81 (s, 1H), 6.80 (s, 1H), 6.48 (d,  $J = 8.0$  Hz, 1H), 5.71 (s, 1H), 3.67 (t,  $J = 8.0$  Hz, 1H), 3.24 (t,  $J = 11.4$  Hz, 1H), 2.69 (t,  $J = 8.4$  Hz, 2H), 1.97 (d,  $J = 12.0$  Hz, 2H), 1.80-1.70 (m, 3H), 1.44-1.33 (m, 2H), 1.27-1.14 (m, 3H).  $^{13}\text{C}$  NMR (100 MHz,  $\text{CDCl}_3$ )  $\delta$ : 166.4, 146.7, 145.6, 128.4, 125.0, 124.3, 122.7, 110.8, 109.9, 46.4, 37.0, 31.9, 31.7, 26.5, 26.3. HRMS (ESI)  $m/z$ :  $[\text{M} - \text{H}]^-$  calcd for  $\text{C}_{17}\text{H}_{19}\text{N}_2\text{O}$  267.1497; found 267.1488.

*5-Isopropyl-1, 2-dihydro-3H-pyrazolo[1, 2-a]cinnolin-3-one (3ap)*. Yellow solid (54 mg, 78% yield), ethyl acetate/petroleum ether = 1:4. mp 74-75 °C.  $^1\text{H}$  NMR (400 MHz,  $\text{CDCl}_3$ )  $\delta$ : 7.07-7.03 (m, 1H), 6.84-6.80 (m, 2H), 6.48 (d,  $J = 8.0$  Hz, 1H), 5.75 (s, 1H), 3.68 (t,  $J = 8.4$  Hz,

2H), 3.63-3.56 (m, 1H), 2.71(t,  $J = 8.4$  Hz, 2H), 1.17 (d,  $J = 6.8$  Hz, 6H).  $^{13}\text{C}$  NMR (100 MHz,  $\text{CDCl}_3$ )  $\delta$ : 166.4, 146.6, 146.5, 128.5, 125.1, 124.2, 122.7, 110.8, 109.6, 46.4, 31.7, 27.5, 21.1. HRMS (ESI)  $m/z$ :  $[\text{M} - \text{H}]^-$  calcd for  $\text{C}_{14}\text{H}_{15}\text{N}_2\text{O}$  227.1184; found 227.1174.

*8-Bromo-5-(4-bromophenyl)-1,2-dihydro-3H-pyrazolo[1,2-a]cinnolin-3-one* (**3dd**).

Yellow solid (115 mg, 92% yield), ethyl acetate/petroleum ether = 1:4. mp 179-180 °C.  $^1\text{H}$  NMR (400 MHz,  $\text{CDCl}_3$ )  $\delta$  7.51 (d,  $J = 8.4$  Hz, 2H), 7.34 (d,  $J = 8.4$  Hz, 2H), 7.26 (d,  $J = 8.4$  Hz, 1H), 7.14 (s, 1H), 6.57 (d,  $J = 8.4$  Hz, 1H), 6.32 (s, 1H), 3.94 (t,  $J = 8.0$  Hz, 2H), 2.68 (t,  $J = 7.8$  Hz, 2H).  $^{13}\text{C}$  NMR (100 MHz,  $\text{CDCl}_3$ )  $\delta$  170.0, 145.5, 137.5, 131.8, 131.7, 131.6, 129.1, 127.8, 126.7, 123.5, 115.2, 114.4, 112.9, 45.7, 30.6. HRMS (ESI)  $m/z$ :  $[\text{M} + \text{H}]^+$  calcd for  $\text{C}_{17}\text{H}_{13}\text{Br}_2\text{N}_2\text{O}$  420.9374; found 420.9359.

*8-Bromo-5-(p-tolyl)-1,2-dihydro-3H-pyrazolo[1,2-a]cinnolin-3-one* (**3dk**). Yellow solid (103 mg, 97% yield), ethyl acetate/petroleum ether = 1:4. mp 195-196 °C.  $^1\text{H}$  NMR (400 MHz,  $\text{CDCl}_3$ )  $\delta$  7.38 (d,  $J = 8.0$  Hz, 2H), 7.23 (d,  $J = 8.8$  Hz, 1H), 7.19 (d,  $J = 7.6$  Hz, 2H), 7.13 (s, 1H), 6.55 (d,  $J = 8.4$  Hz, 1H), 6.29 (s, 1H), 3.92 (t,  $J = 7.8$  Hz, 2H), 2.68 (t,  $J = 8.0$  Hz, 2H), 2.37 (s, 3H).  $^{13}\text{C}$  NMR (100 MHz,  $\text{CDCl}_3$ )  $\delta$  169.9, 145.5, 139.6, 138.7, 131.3, 129.9, 129.3, 128.8, 127.3, 126.3, 115.2, 113.2, 112.8, 45.6, 30.8, 21.5. HRMS (ESI)  $m/z$ :  $[\text{M} + \text{H}]^+$  calcd for  $\text{C}_{18}\text{H}_{16}\text{BrN}_2\text{O}$  355.0446; found 355.0435.

*5-(4-Bromophenyl)-9-methyl-1,2-dihydro-3H-pyrazolo[1,2-a]cinnolin-3-one* (**3ld**).

Yellow solid (87 mg, 82% yield), ethyl acetate/petroleum ether = 1:4. mp 227-228 °C.  $^1\text{H}$  NMR (400 MHz,  $\text{CDCl}_3$ )  $\delta$  7.49 (d,  $J = 8.4$  Hz, 2H), 7.36 (d,  $J = 8.4$  Hz, 2H), 6.95 (d,  $J = 7.6$  Hz, 1H), 6.73 (d,  $J = 7.6$  Hz, 1H), 6.55 (s, 1H), 6.45 (s, 1H), 3.98 (t,  $J = 7.8$  Hz, 2H), 2.67 (t,  $J = 7.8$  Hz, 2H), 2.33 (s, 3H).  $^{13}\text{C}$  NMR (100 MHz,  $\text{CDCl}_3$ )  $\delta$  170.6, 146.5, 140.1, 135.2, 132.2, 131.6,

127.6, 126.9, 123.4, 122.7, 122.2, 116.2, 112.2, 45.7, 30.7, 22.0. HRMS (ESI) m/z: [M + Na]<sup>+</sup> calcd for C<sub>18</sub>H<sub>15</sub>BrN<sub>2</sub>NaO 377.0265; found 377.0254.

*9-Methyl-5-(p-tolyl)-1,2-dihydro-3H-pyrazolo[1,2-a]cinnolin-3-one (3lk)*. Yellow solid (63 mg, 73% yield), ethyl acetate/petroleum ether = 1:4. mp 204-205 °C. <sup>1</sup>H NMR (400 MHz, CDCl<sub>3</sub>) δ 7.39 (d, *J* = 8.0 Hz, 2H), 7.18 (d, *J* = 8.0 Hz, 2H), 6.93 (d, *J* = 7.8 Hz, 1H), 6.71 (d, *J* = 7.6 Hz, 1H), 6.54 (s, 1H), 6.41 (s, 1H), 3.97 (t, *J* = 7.8 Hz, 2H), 2.67 (t, *J* = 7.8 Hz, 2H), 2.36 (s, 3H), 2.32 (s, 3H). <sup>13</sup>C NMR (100 MHz, CDCl<sub>3</sub>) δ 170.3, 146.5, 139.4, 138.8, 136.4, 130.4, 129.2, 126.6, 126.0, 123.2, 122.6, 114.8, 112.1, 45.6, 30.9, 22.0, 21.5. HRMS (ESI) m/z: [M - H]<sup>-</sup> calcd for C<sub>19</sub>H<sub>17</sub>N<sub>2</sub>O 289.1341; found 289.1327.

*2,2-Dimethyl-5-phenyl-1,2-dihydro-3H-pyrazolo[1,2-a]cinnolin-3-one (3oa)*. Yellow solid (84 mg, 96% yield), ethyl acetate/petroleum ether = 1:4. mp 187-188 °C. <sup>1</sup>H NMR (400 MHz, CDCl<sub>3</sub>) δ 7.40-7.33 (m, 5H), 7.11 (t, *J* = 7.8 Hz, 1H), 6.97 (d, *J* = 7.2 Hz, 1H), 6.85 (t, *J* = 7.6 Hz, 1H), 6.61 (d, *J* = 8.0 Hz, 1H), 6.22 (s, 1H), 3.66 (s, 2H), 1.30 (s, 6H). <sup>13</sup>C NMR (100 MHz, CDCl<sub>3</sub>) δ 172.5, 147.8, 137.1, 133.0, 129.2, 128.9, 128.3, 126.5, 126.3, 124.2, 122.5, 115.6, 111.4, 59.9, 40.7, 23.9. HRMS (ESI) m/z: [M + H]<sup>+</sup> calcd for C<sub>19</sub>H<sub>19</sub>N<sub>2</sub>O 291.1497; found 291.1484.

*5-(4-Bromophenyl)-2,2-dimethyl-1,2-dihydro-3H-pyrazolo[1,2-a]cinnolin-3-one (3od)*. Yellow solid (107 mg, 97% yield), ethyl acetate/petroleum ether = 1:4. mp 192-193 °C. <sup>1</sup>H NMR (400 MHz, CDCl<sub>3</sub>) δ 7.49 (d, *J* = 8.4 Hz, 2H), 7.25 (d, *J* = 7.6 Hz, 2H), 7.13 (t, *J* = 7.8 Hz, 1H), 6.97 (d, *J* = 7.6 Hz, 1H), 6.86 (t, *J* = 7.4 Hz, 1H), 6.62 (d, *J* = 8.0 Hz, 1H), 6.22 (s, 1H), 3.67 (s, 2H), 1.29 (s, 6H). <sup>13</sup>C NMR (100 MHz, CDCl<sub>3</sub>) δ 172.7, 147.7, 136.0, 132.0, 131.5, 129.5, 128.0, 126.5, 123.9, 122.9, 122.6, 116.0, 111.5, 59.8, 40.7, 23.8. HRMS (ESI) m/z: [M

+ H]<sup>+</sup> calcd for C<sub>19</sub>H<sub>18</sub>BrN<sub>2</sub>O 369.0603; found 369.0587.

*2,2-Dimethyl-5-(4-(trifluoromethyl)phenyl)-1,2-dihydro-3H-pyrazolo[1,2-a]cinnolin-3-one (3oe)*. Yellow solid (96 mg, 90% yield), ethyl acetate/petroleum ether = 1:4. mp 146-147 °C. <sup>1</sup>H NMR (400 MHz, CDCl<sub>3</sub>) δ 7.61 (d, *J* = 8.0 Hz, 2H), 7.48 (d, *J* = 8.4 Hz, 2H), 7.15 (t, *J* = 7.6 Hz, 1H), 6.99 (d, *J* = 7.6 Hz, 1H), 6.87 (t, *J* = 7.4 Hz, 1H), 6.63 (d, *J* = 8.0 Hz, 1H), 6.29 (s, 1H), 3.68 (s, 2H), 1.30 (s, 6H). <sup>13</sup>C NMR (100 MHz, CDCl<sub>3</sub>) δ 172.8, 147.8, 136.5 (q, *J* = 1.6 Hz), 135.5, 130.4 (q, *J* = 32.3 Hz), 129.9, 126.8, 126.7, 125.3 (q, *J* = 4.0 Hz), 124.2 (q, *J* = 270.7 Hz), 123.6, 122.6, 117.4, 111.5, 59.9, 40.7, 23.8. HRMS (ESI) *m/z*: [M + H]<sup>+</sup> calcd for C<sub>20</sub>H<sub>18</sub>F<sub>3</sub>N<sub>2</sub>O 359.1371; found 359.1356.

*4-(2,2-Dimethyl-3-oxo-2,3-dihydro-1H-pyrazolo[1,2-a]cinnolin-5-yl)benzotrile (3of)*. Yellow solid (86 mg, 91% yield), ethyl acetate/petroleum ether = 1:4. mp 190-191 °C. <sup>1</sup>H NMR (400 MHz, CDCl<sub>3</sub>) δ 7.64 (d, *J* = 8.0 Hz, 2H), 7.47 (d, *J* = 8.0 Hz, 2H), 7.17 (t, *J* = 7.8 Hz, 1H), 7.01 (d, *J* = 7.2 Hz, 1H), 6.88 (t, *J* = 7.6 Hz, 1H), 6.64 (d, *J* = 8.0 Hz, 1H), 6.36 (s, 1H), 3.70 (s, 2H), 1.30 (s, 6H). <sup>13</sup>C NMR (100 MHz, CDCl<sub>3</sub>) δ 173.2, 147.9, 137.5, 135.0, 132.1, 130.3, 127.1, 126.9, 123.3, 122.6, 118.9, 118.4, 111.9, 111.6, 59.9, 40.6, 23.8. HRMS (ESI) *m/z*: [M + H]<sup>+</sup> calcd for C<sub>20</sub>H<sub>18</sub>N<sub>3</sub>O 316.1450; found 316.1439.

*2,2-Dimethyl-5-(thiophen-2-yl)-1,2-dihydro-3H-pyrazolo[1,2-a]cinnolin-3-one (3on)*. Yellow solid (69 mg, 78% yield), ethyl acetate/petroleum ether = 1:4. mp 171-172 °C. <sup>1</sup>H NMR (400 MHz, CDCl<sub>3</sub>) δ 7.29 (d, *J* = 5.2 Hz, 1H), 7.15-7.09 (m, 2H), 7.01 (t, *J* = 4.4 Hz, 1H), 6.98 (d, *J* = 7.2 Hz, 1H), 6.85 (t, *J* = 7.6 Hz, 1H), 6.65 (d, *J* = 8.0 Hz, 1H), 6.38 (s, 1H), 3.70 (s, 2H), 1.28 (s, 6H). <sup>13</sup>C NMR (100 MHz, CDCl<sub>3</sub>) δ 174.4, 147.5, 136.0, 131.4, 129.2, 127.4, 126.7, 126.6, 126.0, 124.0, 122.4, 115.2, 111.5, 58.9, 40.6, 24.1. HRMS (ESI) *m/z*: [M + H]<sup>+</sup> calcd

for C<sub>17</sub>H<sub>17</sub>N<sub>2</sub>OS 297.1062; found 297.1051.

*5-Cyclohexyl-2,2-dimethyl-1,2-dihydro-3H-pyrazolo[1,2-a]cinnolin-3-one (3oo)*. Yellow solid (63 mg, 71% yield), ethyl acetate/petroleum ether = 1:4. mp 103-104 °C. <sup>1</sup>H NMR (400 MHz, CDCl<sub>3</sub>) δ 7.04-7.00 (m, 1H), 6.82-6.79 (m, 2H), 6.43 (d, *J* = 7.6 Hz, 1H), 5.66 (s, 1H), 3.39 (s, 2H), 3.30 (t, *J* = 11.4 Hz, 1H), 1.92 (d, *J* = 12.0 Hz, 2H), 1.80-1.70 (m, 3H), 1.44-1.33 (m, 2H), 1.28 (s, 6H), 1.26-1.16 (m, 3H). <sup>13</sup>C NMR (100 MHz, CDCl<sub>3</sub>) δ 170.77, 146.8, 145.4, 128.3, 124.8, 124.0, 122.6, 110.9, 109.1, 60.3, 41.3, 36.6, 31.9, 26.5, 26.4, 23.4. HRMS (ESI) *m/z*: [M + Na]<sup>+</sup> calcd for C<sub>19</sub>H<sub>24</sub>N<sub>2</sub>NaO 319.1786; found 319.1775.

*5-Isopropyl-2,2-dimethyl-1,2-dihydro-3H-pyrazolo[1,2-a]cinnolin-3-one (3op)*. Yellow solid (56 mg, 73% yield), ethyl acetate/petroleum ether = 1:4. <sup>1</sup>H NMR (400 MHz, CDCl<sub>3</sub>) δ 7.04-7.44 (m, 1H), 6.80-6.77 (m, 2H), 6.44 (d, *J* = 8.0 Hz, 1H), 5.71 (s, 1H), 3.70-3.62 (m, 1H), 3.40 (s, 2H), 1.29 (s, 6H), 1.15 (d, *J* = 6.8 Hz, 6H). <sup>13</sup>C NMR (100 MHz, CDCl<sub>3</sub>) δ 170.8, 146.9, 146.3, 128.5, 124.9, 123.9, 122.6, 110.9, 109.1, 60.3, 41.3, 29.8, 27.0, 23.4, 21.0. HRMS (ESI) *m/z*: [M + H]<sup>+</sup> calcd for C<sub>16</sub>H<sub>21</sub>N<sub>2</sub>O 257.1654; found 257.1642.

**3. Gram-Scale Synthesis of 3aa.** To a solution of compound **1a** (324 mg, 2.0 mmol) and compound **2a** (588 mg, 3.0 mmol) in DCE (14 mL) were added [RuCl<sub>2</sub>(*p*-cymene)]<sub>2</sub> (122.5 mg, 0.2 mmol) and Zn(OTf)<sub>2</sub> (727 mg, 2.0 mmol). The reaction mixture was stirred at 100 °C on a heating block for 10 min. After cooling to room temperature, the solvent was removed in vacuo and the residue was purified using column chromatography to afford the compound **3aa** as a yellow solid (417 mg, 80% yield).

**4. Procedure for the Synthesis of Compound 4.** To a solution of compound **3aa** (52.4 mg, 0.2 mmol) in toluene (2 mL) was added Lawesson's reagent (162 mg, 0.4 mmol). The



reaction mixture was stirred at 100 °C for 2 h. After cooling to room temperature, water (5 mL) was added and the mixture was extracted with ethyl acetate (3 × 5 mL). The combined organic layers were dried and concentrated under reduced pressure. The residue was purified using preparative TLC to afford the compound **4**.

*5-Phenyl-1,2-dihydro-3H-pyrazolo[1,2-*a*]cinnoline-3-thione (4)*. Yellow solid (30 mg, 54% yield), dichloromethane/petroleum ether = 1:2. mp 224-225 °C. <sup>1</sup>H NMR (400 MHz, CDCl<sub>3</sub>) δ 7.43 (d, *J* = 7.2 Hz, 2H), 7.38 (t, *J* = 7.4 Hz, 2H), 7.33 (t, *J* = 6.8 Hz, 1H), 7.22 (t, *J* = 7.8 Hz, 1H), 7.14 (d, *J* = 7.6 Hz, 1H), 6.96 (t, *J* = 7.4 Hz, 1H), 6.72 (d, *J* = 8.0 Hz, 1H), 6.64 (s, 1H), 4.00 (t, *J* = 8.2 Hz, 2H), 3.29 (t, *J* = 8.4 Hz, 2H). <sup>13</sup>C NMR (100 MHz, CDCl<sub>3</sub>) δ 189.3, 146.3, 138.2, 132.8, 129.9, 128.6, 128.4, 127.2, 126.3, 123.7, 122.9, 121.0, 110.8, 47.4, 44.2. HRMS (ESI) *m/z*: [M + H]<sup>+</sup> calcd for C<sub>17</sub>H<sub>15</sub>N<sub>2</sub>S 279.0956; found 279.0968.

**5. Procedure for the Synthesis of Compound 5.** To a solution of **3da** (68 mg, 0.2 mmol) in THF/H<sub>2</sub>O (5 mL) was added Pd(PPh<sub>3</sub>)<sub>4</sub> (185 mg, 0.16 mmol), and K<sub>2</sub>CO<sub>3</sub> (248 mg, 1.8 mmol). After 1 h at 45 °C in an oil bath, phenylboronic acid (30 mg, 0.24 mmol) was added. The resulting mixture was stirred at 65 °C in an oil bath for 8 h under N<sub>2</sub>. After cooling to room temperature, water (5 mL) was added and the mixture was extracted with ethyl acetate (3 × 5 mL). The combined organic layers were dried and concentrated under reduced pressure followed by silica gel column chromatography purification to give the coupling product **5**.

*5,8-Diphenyl-1,2-dihydro-3H-pyrazolo[1,2-*a*]cinnolin-3-one (5)*. Yellow solid (55 mg, 81% yield), ethyl acetate/petroleum ether = 1:4. mp 191-192 °C. <sup>1</sup>H NMR (400 MHz, CDCl<sub>3</sub>) δ 7.55-7.52 (m, 4H), 7.45-7.32 (m, 7H), 7.30 (s, 1H), 6.79 (d, *J* = 8.4 Hz, 1H), 6.51 (s, 1H), 4.02 (t, *J* = 7.8 Hz, 2H), 2.72 (t, *J* = 7.8 Hz, 2H). <sup>13</sup>C NMR (100 MHz, CDCl<sub>3</sub>) δ 170.2, 145.9, 140.2,

137.7, 135.8, 133.1, 129.1, 128.9, 128.5, 127.9, 127.3, 126.7, 126.3, 125.5, 125.4, 115.5, 111.7, 45.8, 30.9. HRMS (ESI)  $m/z$ :  $[M + H]^+$  calcd for  $C_{23}H_{19}N_2O$  339.1497; found 339.1487.

## 6. H/D Exchange Experiments

To a solution of *N*-phenylpyrazolidin-3-one **1a** (49 mg, 0.3 mmol) in DCE (2 mL) and  $CD_3OD$  (0.122 mL, 3 mmol) were added  $[RuCl_2(p\text{-cymene})]_2$  (18.4 mg, 0.03 mmol) and  $Zn(OTf)_2$  (109 mg, 0.3 mmol). The reaction mixture was stirred at 100 °C on a heating block for 3 min. After cooling to room temperature, the solvent was removed in vacuo and the residue was purified using column chromatography (ethyl acetate/petroleum ether = 1:2) to afford **1a-d<sub>n</sub>** in 80% yield. Upon analyzing the  $^1H$  NMR spectrum of the product, the deuteration percentage was determined as 52%.

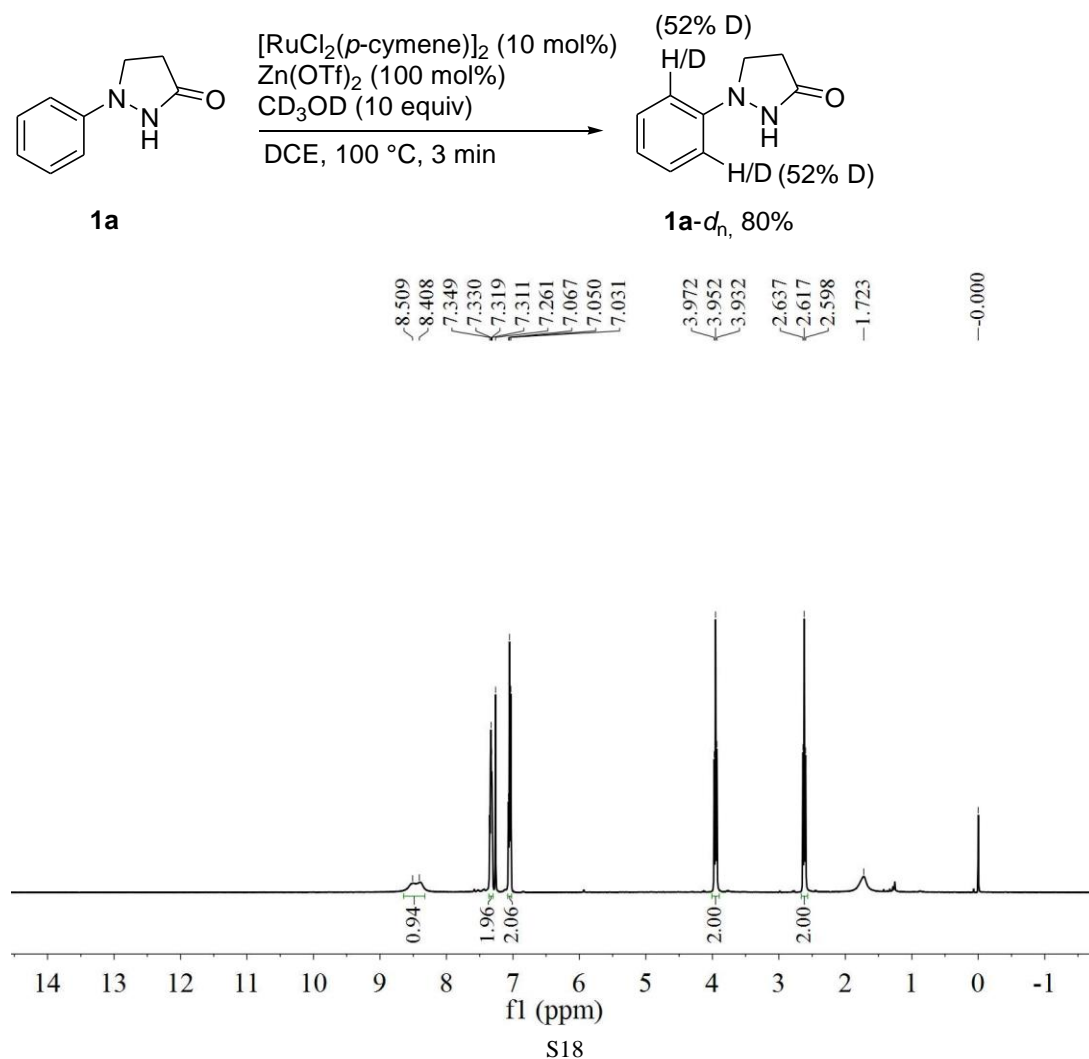

To a solution of phenylpyrazolidin-3-one **1a** (49 mg, 0.3 mmol) and sulfoxonium ylides **2** (88 mg, 0.45 mmol) in DCE (2 mL) and CD<sub>3</sub>OD (0.122 mL, 3 mmol) were added [RuCl<sub>2</sub>(*p*-cymene)]<sub>2</sub> (18.4 mg, 0.03 mmol) and Zn(OTf)<sub>2</sub> (109 mg, 0.3 mmol). The reaction mixture was stirred at 100 °C on a heating block for 10 min. After cooling to room temperature, the solvent was removed in vacuo and the residue was purified using column chromatography (ethyl acetate/petroleum ether = 1:4) to afford **3aa-d<sub>n</sub>** in 92% yield. Upon analyzing the <sup>1</sup>H NMR spectrum of the product, the deuteration percentage was determined as 65%.

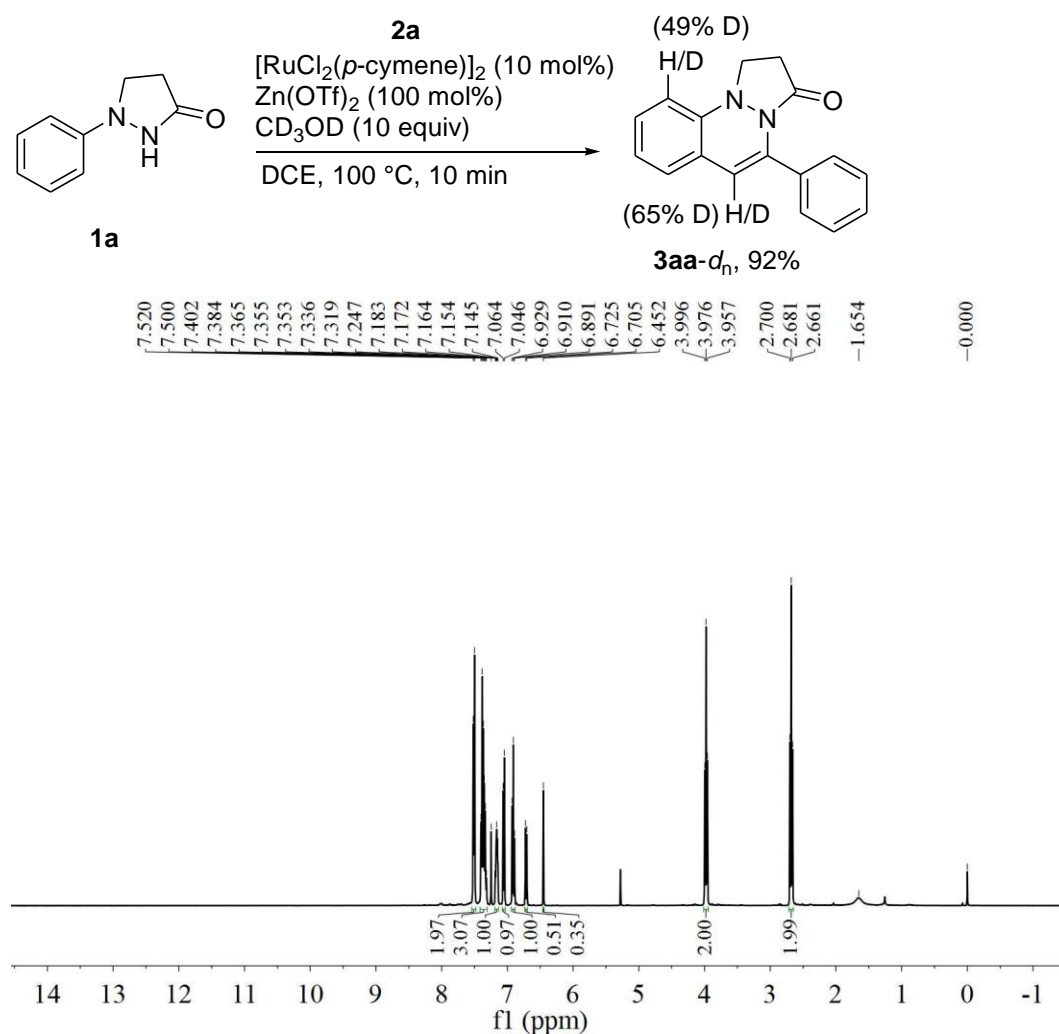

## 7. References

- (1) Zhang, Z.; Jiang, H.; Huang, Y. *Org. Lett.* **2014**, *16*, 5976-5979.
- (2) Zhu, S.; Shi, K.; Zhu, H.; Jia, Z.-K.; Xia, X.-F.; Wang, D.; Zou, L.-H. *Org. Lett.* **2020**, *22*, 1504-1509.

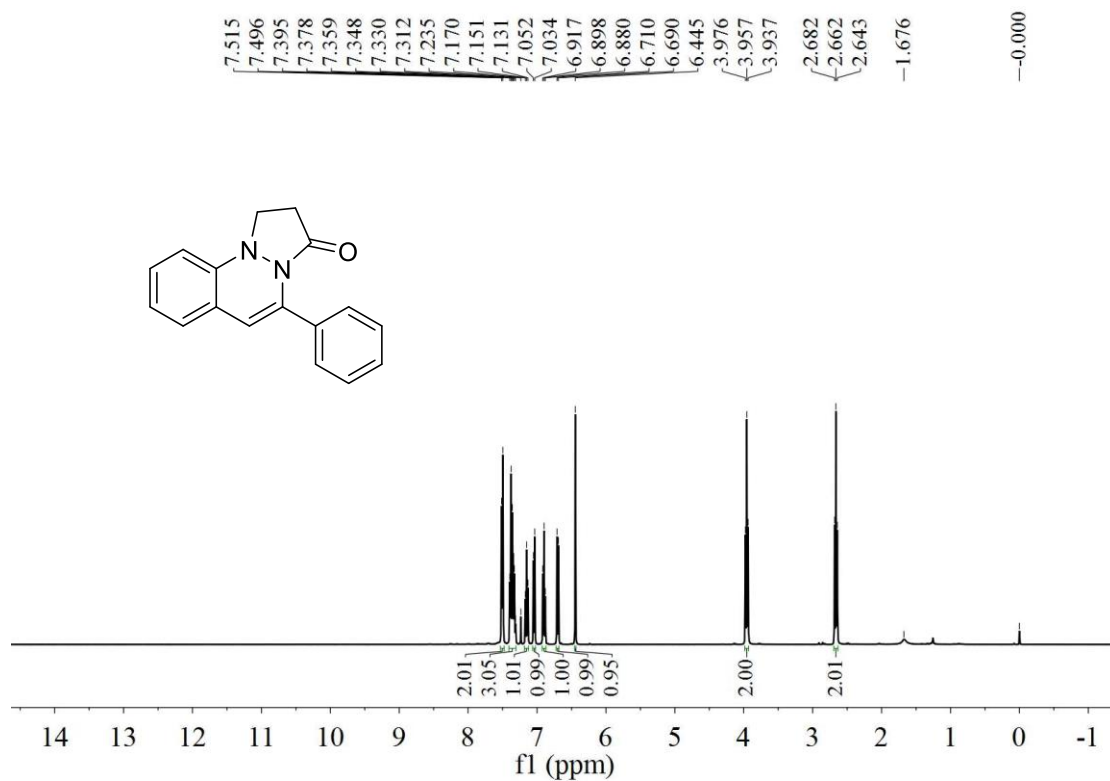

<sup>1</sup>H NMR Spectrum (400 MHz, CDCl<sub>3</sub>) of Compound 3aa

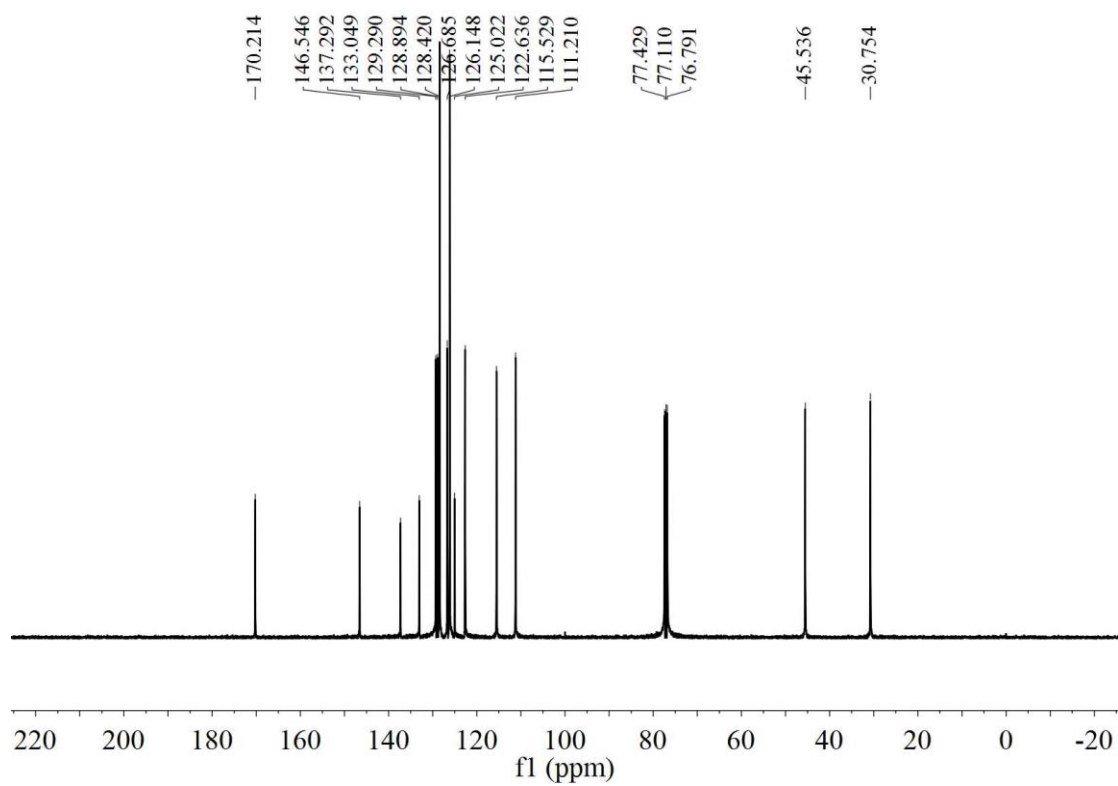

<sup>13</sup>C NMR Spectrum (100 MHz, CDCl<sub>3</sub>) of Compound 3aa

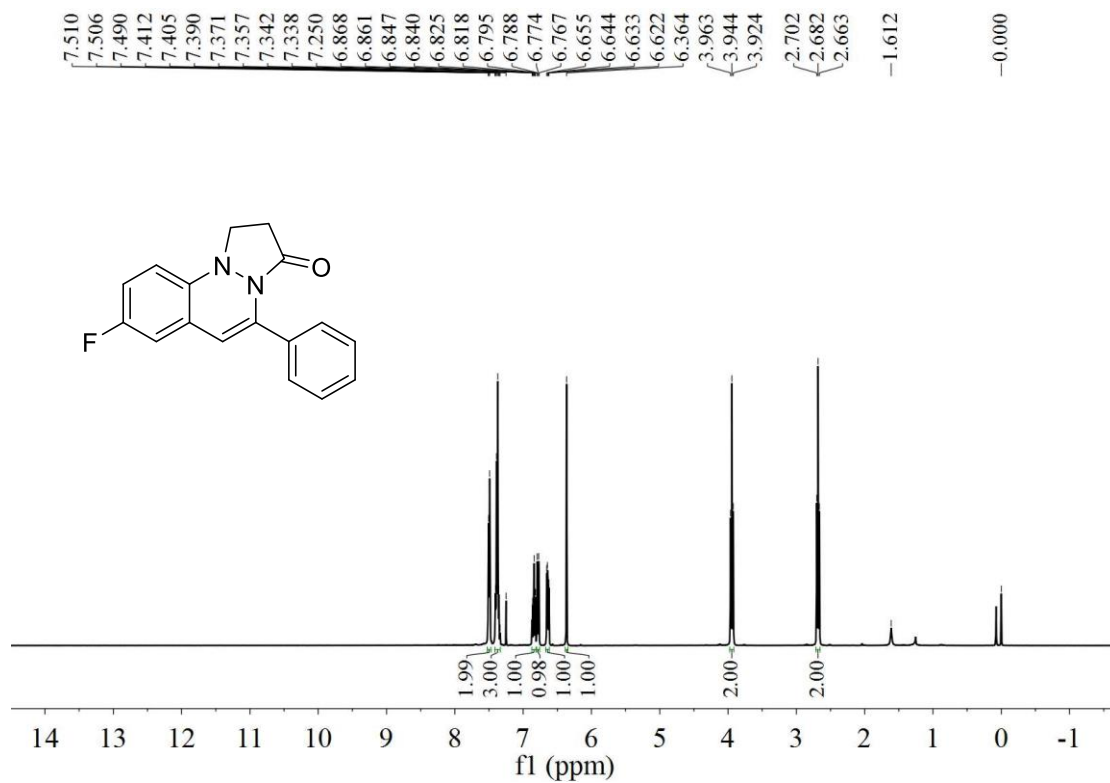

<sup>1</sup>H NMR Spectrum (400 MHz, CDCl<sub>3</sub>) of Compound **3ba**

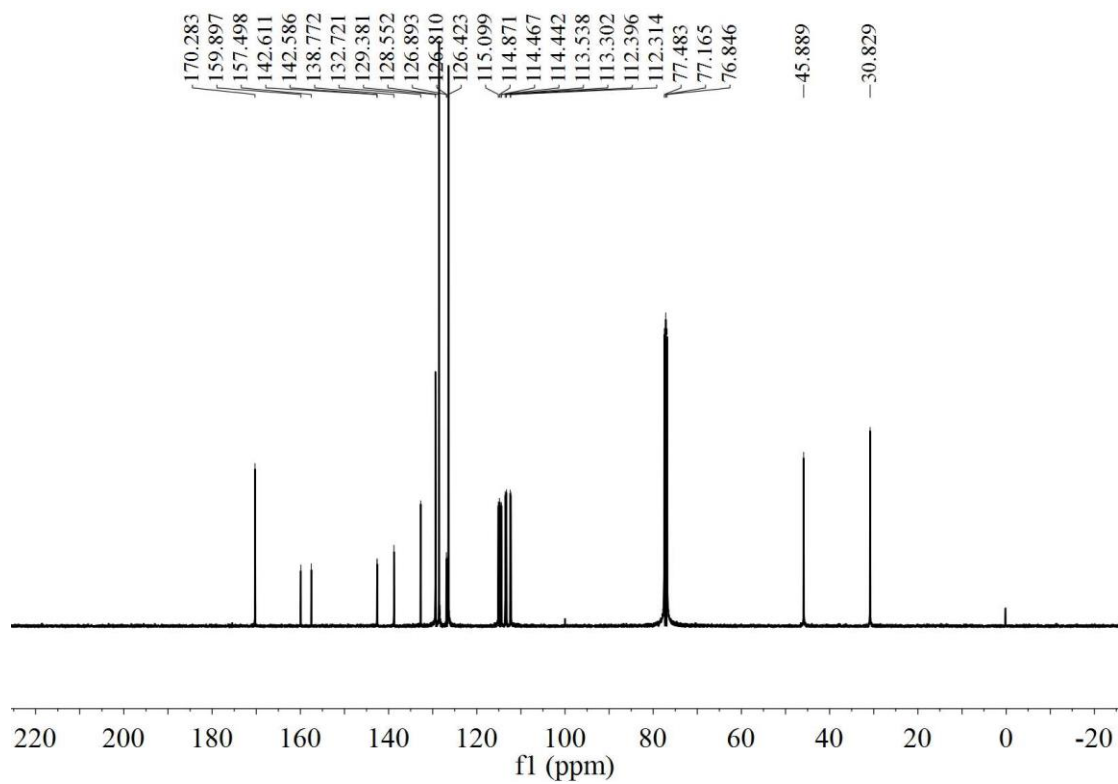

<sup>13</sup>C NMR Spectrum (100 MHz, CDCl<sub>3</sub>) of Compound **3ba**

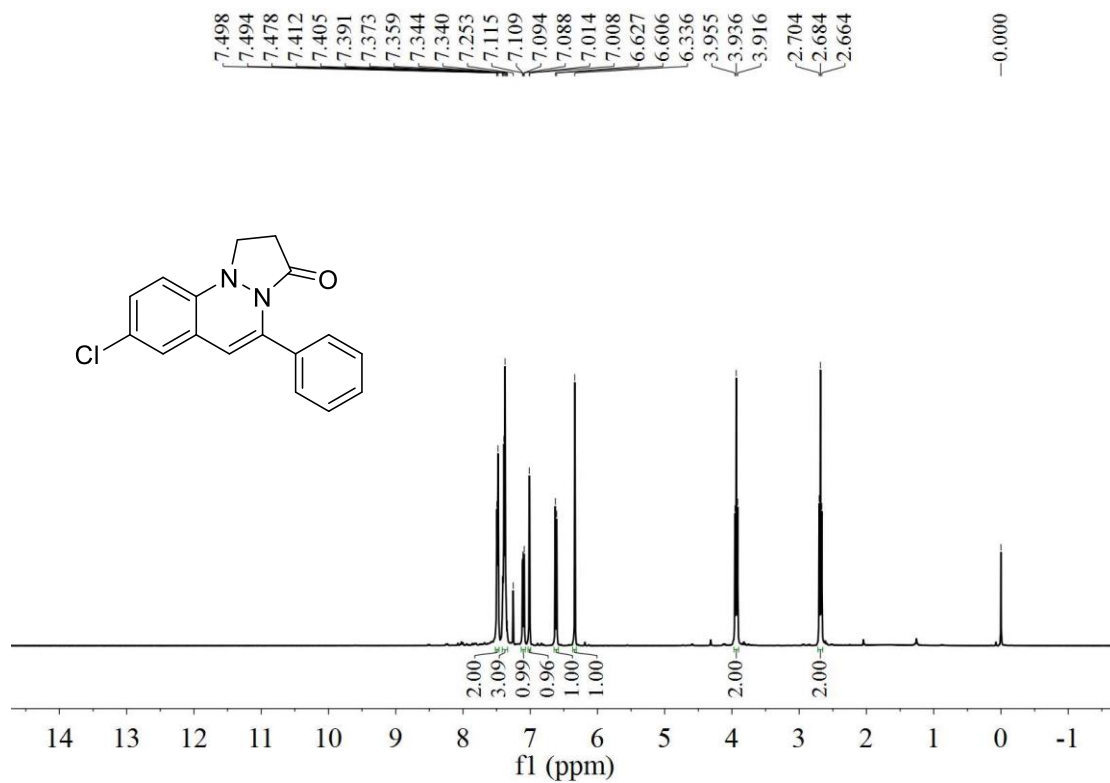

<sup>1</sup>H NMR Spectrum (400 MHz, CDCl<sub>3</sub>) of Compound 3ca

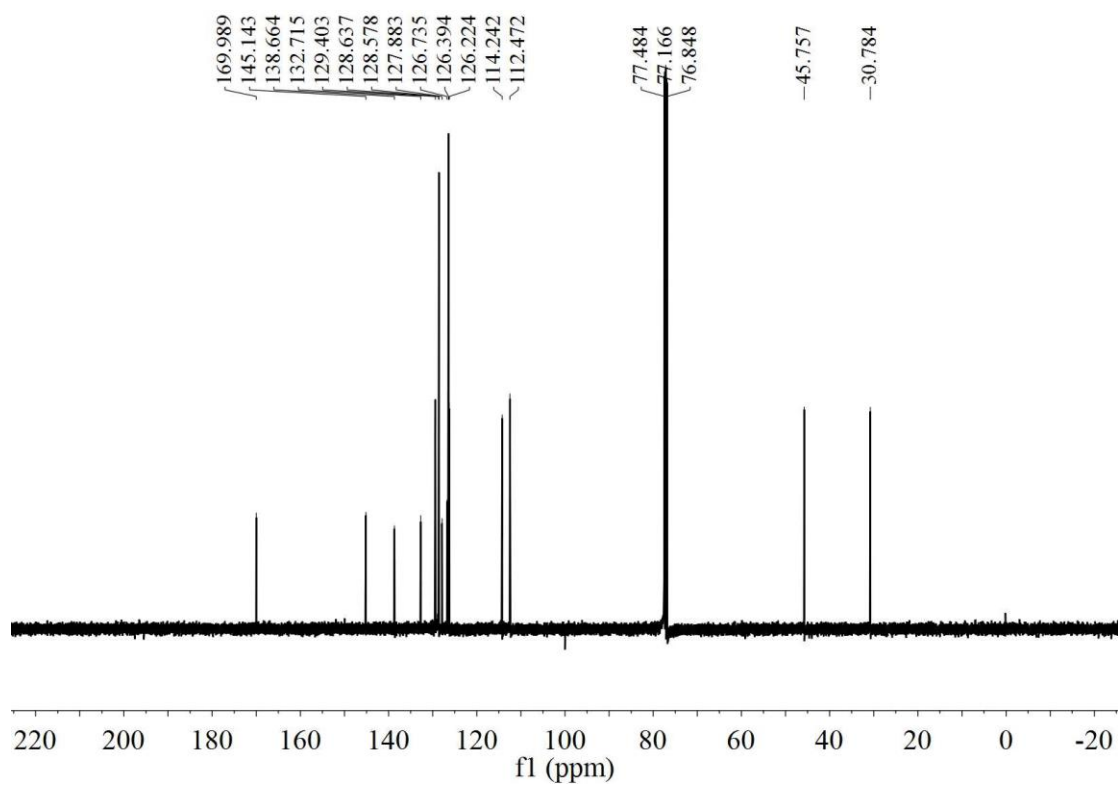

<sup>13</sup>C NMR Spectrum (100 MHz, CDCl<sub>3</sub>) of Compound 3ca

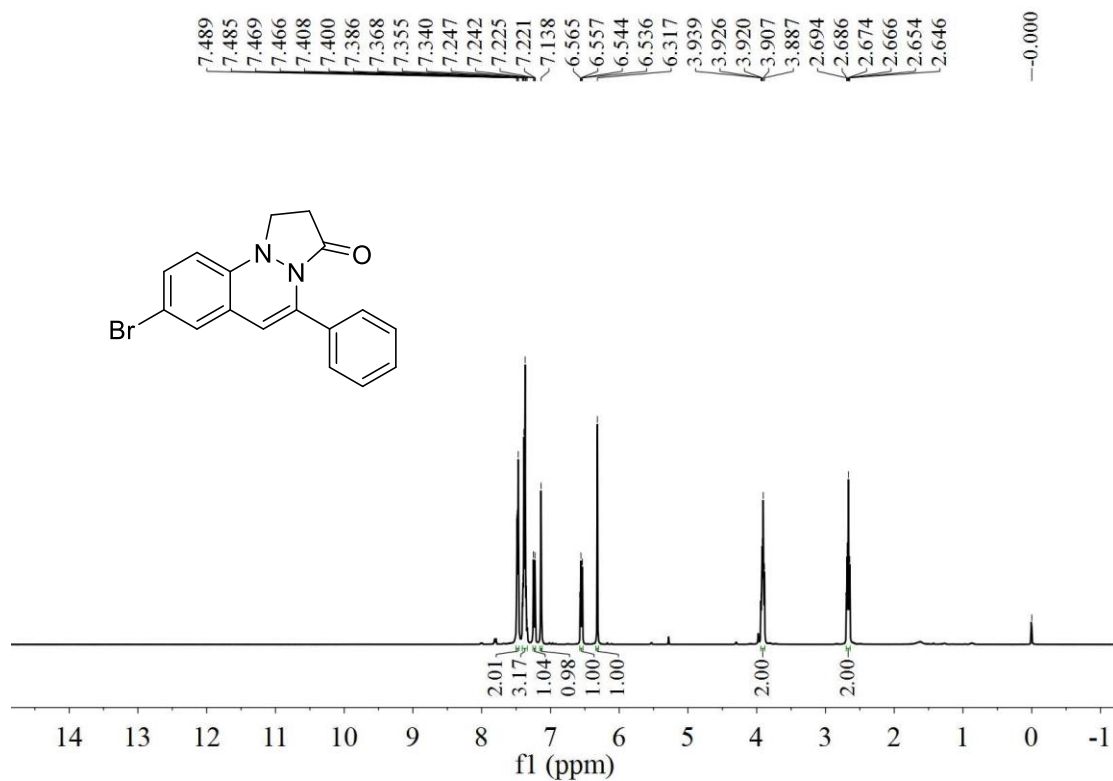

**<sup>1</sup>H NMR Spectrum (400 MHz, CDCl<sub>3</sub>) of Compound 3da**

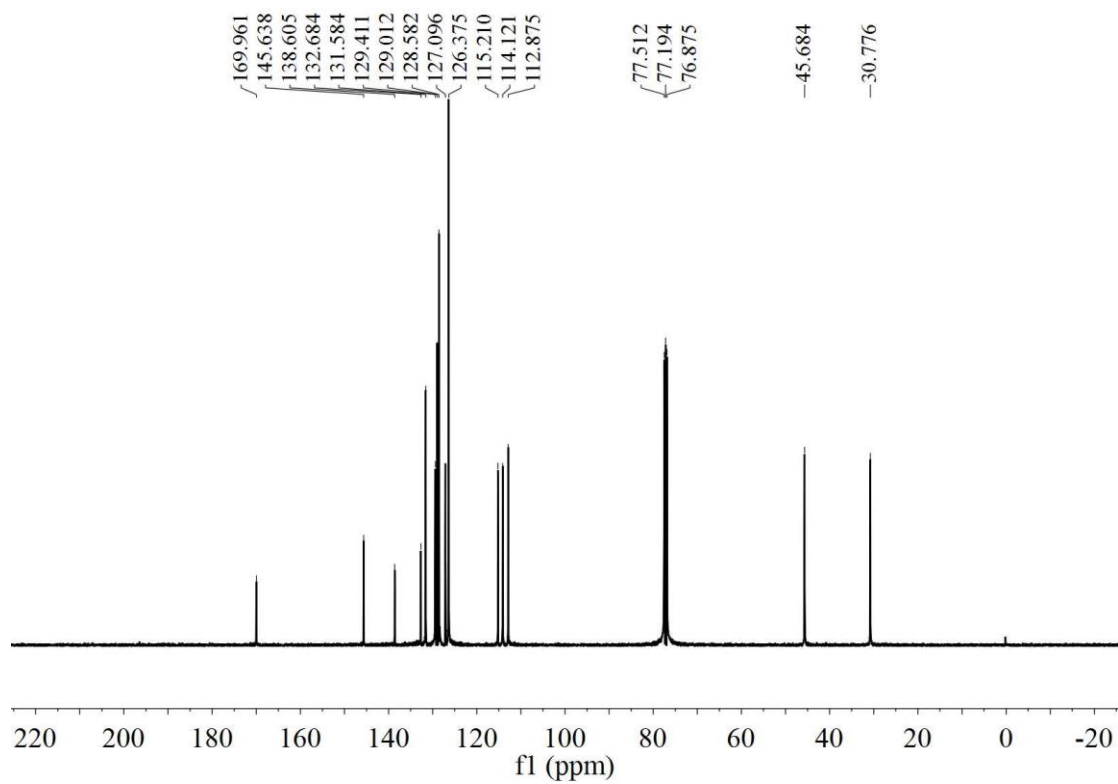

**<sup>13</sup>C NMR Spectrum (100 MHz, CDCl<sub>3</sub>) of Compound 3da**



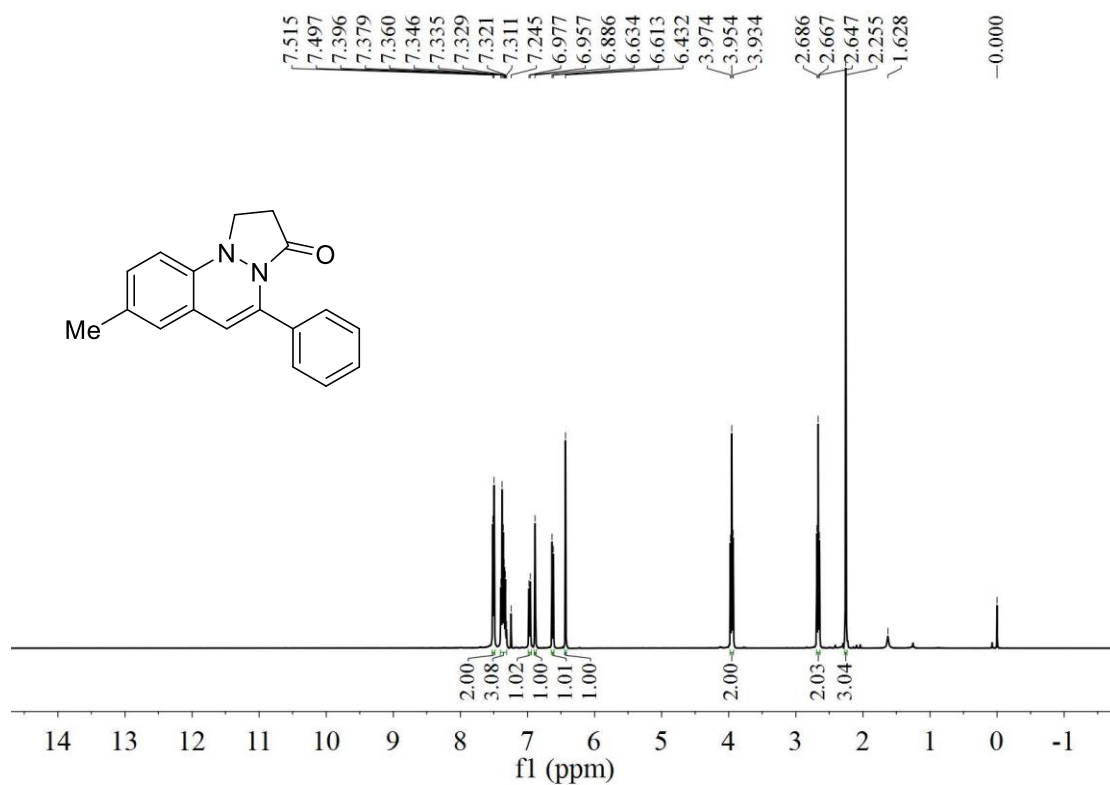

**<sup>1</sup>H NMR Spectrum (400 MHz, CDCl<sub>3</sub>) of Compound 3ea**

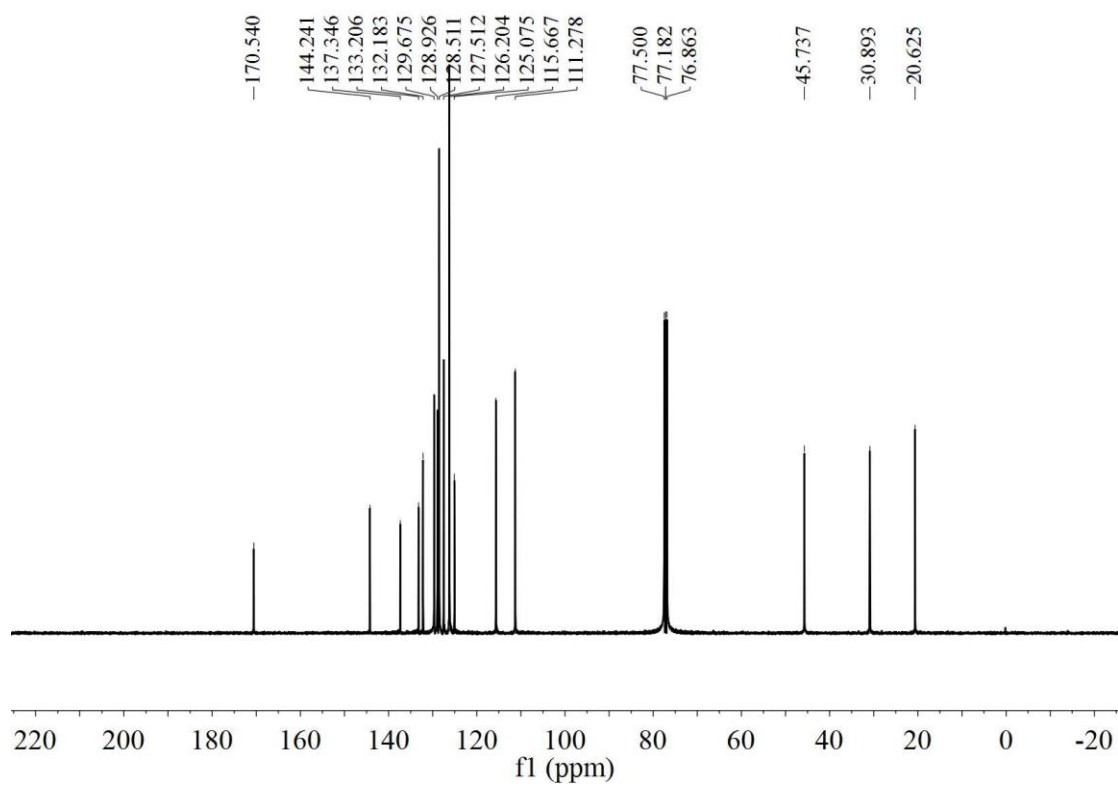

**<sup>13</sup>C NMR Spectrum (100 MHz, CDCl<sub>3</sub>) of Compound 3ea**

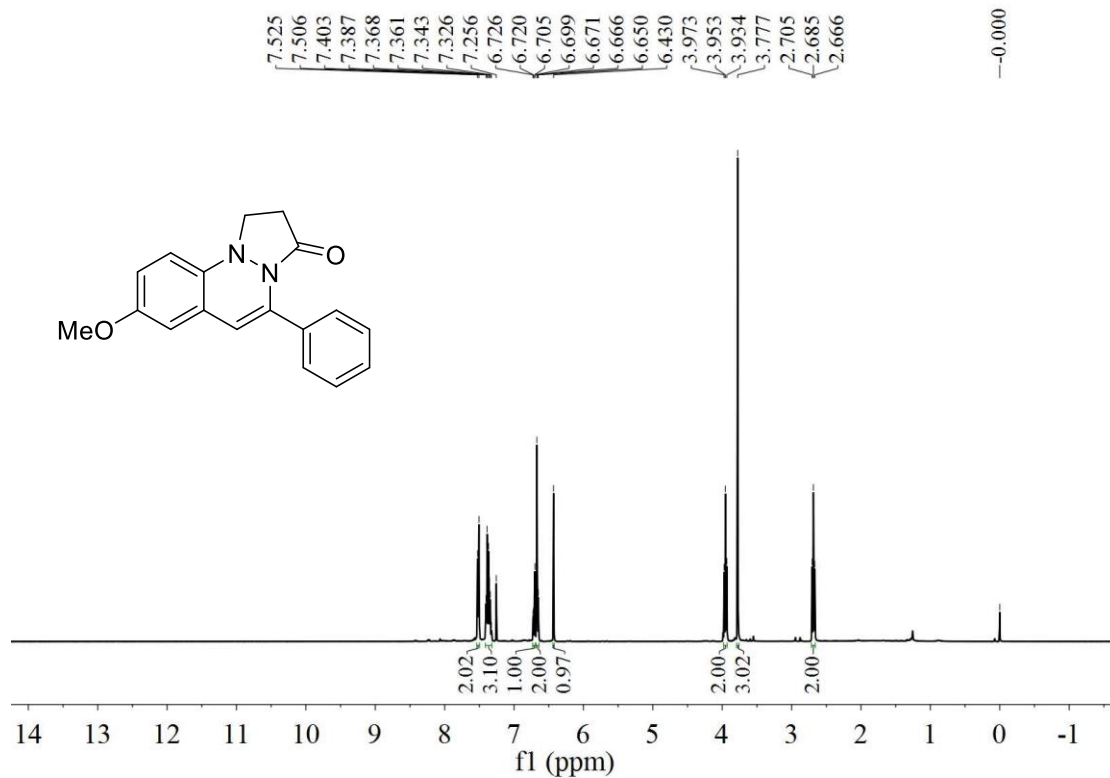

<sup>1</sup>H NMR Spectrum (400 MHz, CDCl<sub>3</sub>) of Compound 3fa

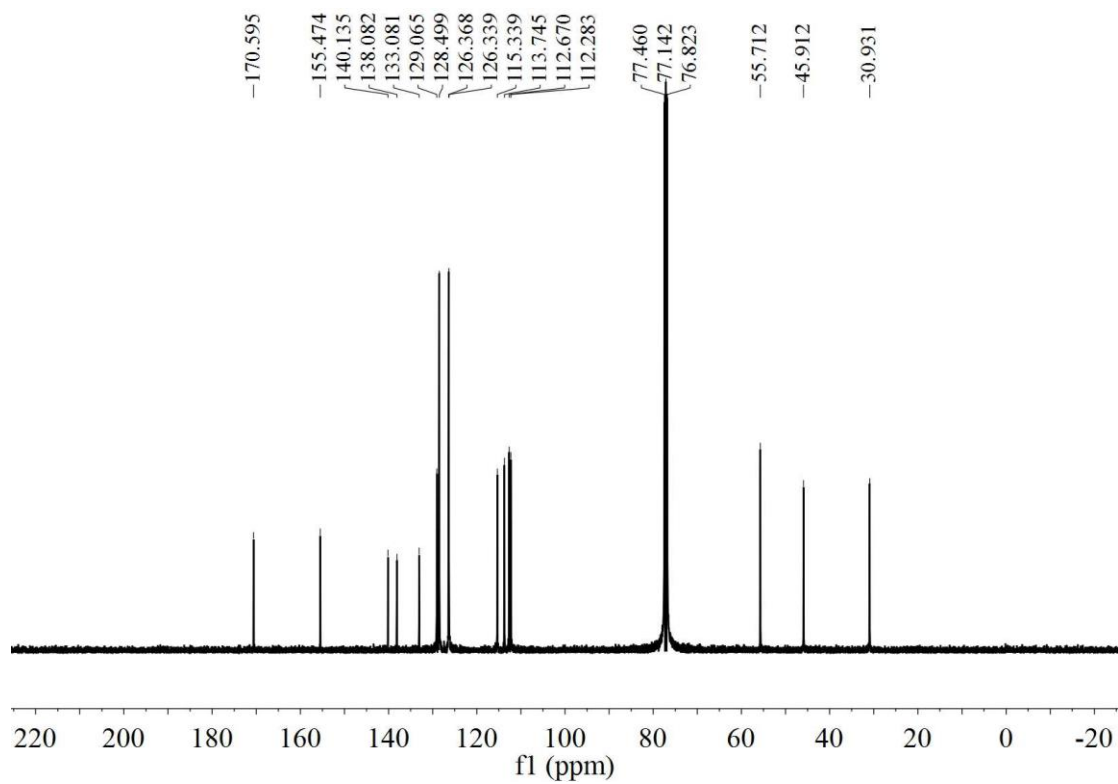

<sup>13</sup>C NMR Spectrum (100 MHz, CDCl<sub>3</sub>) of Compound 3fa

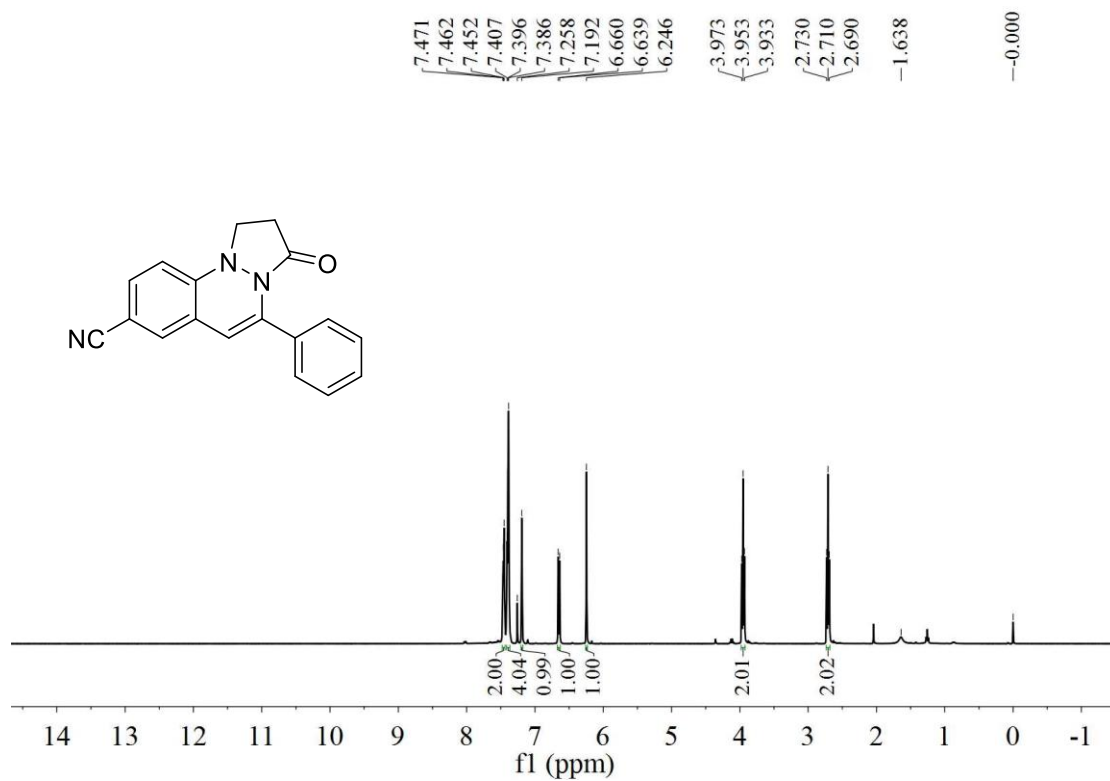

**<sup>1</sup>H NMR Spectrum (400 MHz, CDCl<sub>3</sub>) of Compound **3ga****

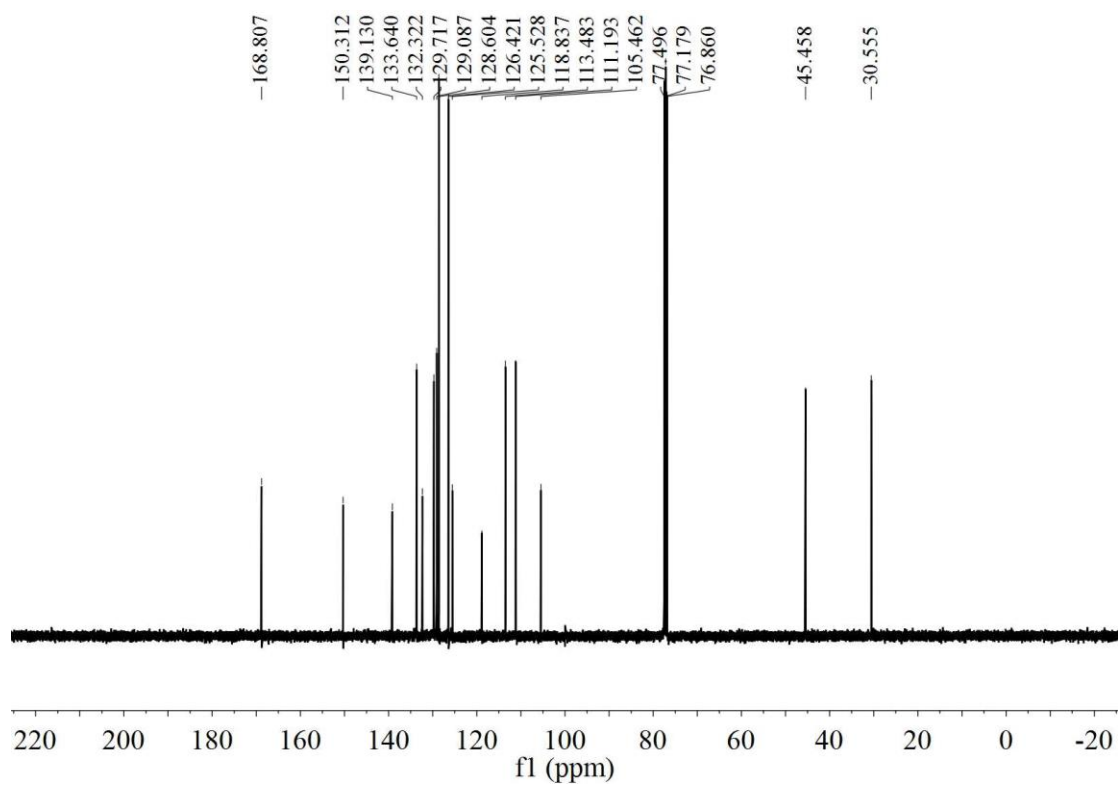

**<sup>13</sup>C NMR Spectrum (100 MHz, CDCl<sub>3</sub>) of Compound **3ga****

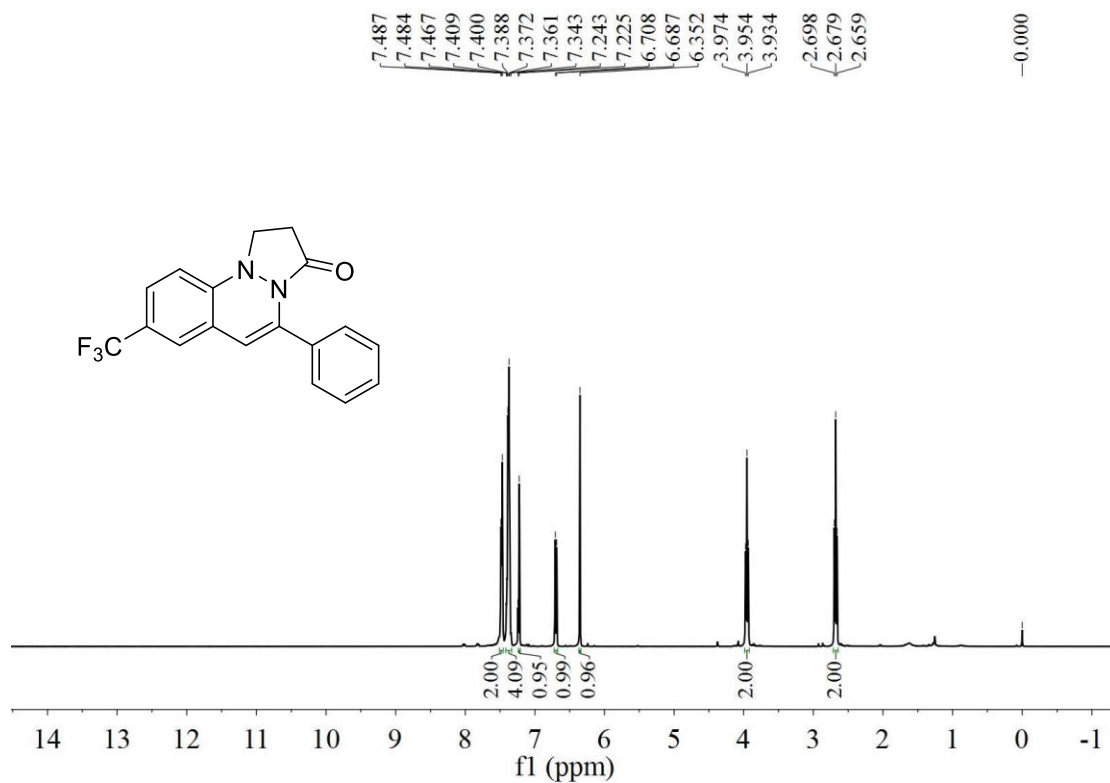

<sup>1</sup>H NMR Spectrum (400 MHz, CDCl<sub>3</sub>) of Compound **3ha**

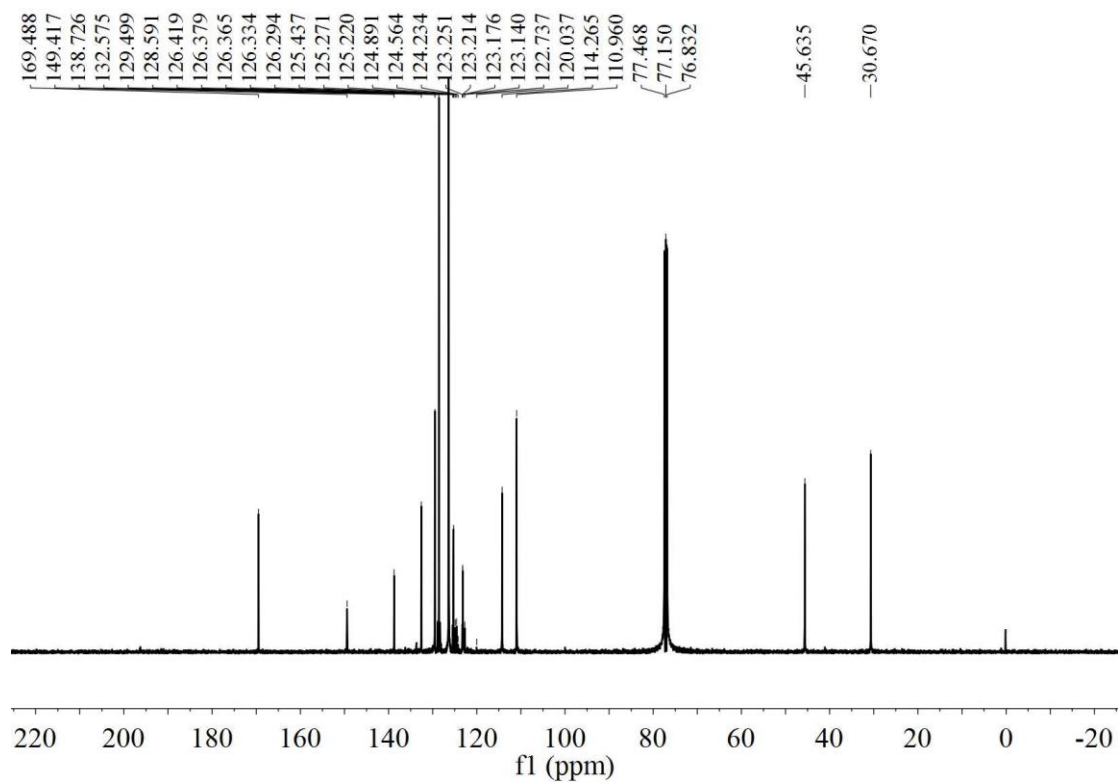

<sup>13</sup>C NMR Spectrum (100 MHz, CDCl<sub>3</sub>) of Compound **3ha**

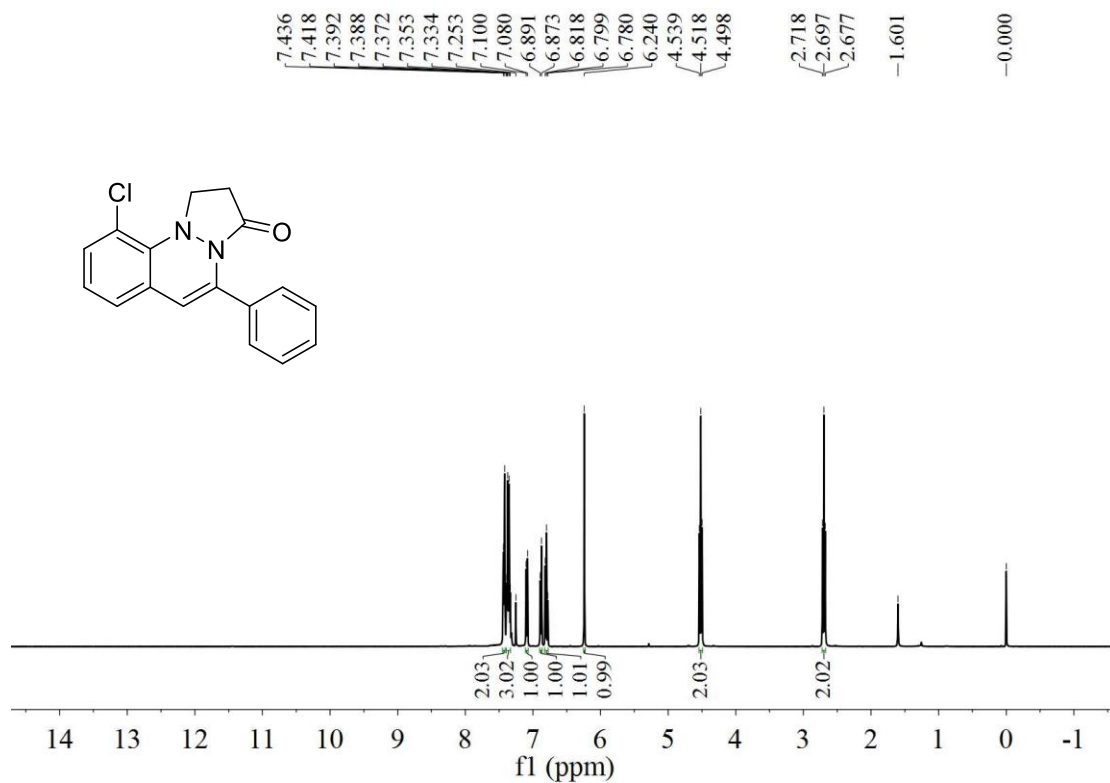

<sup>1</sup>H NMR Spectrum (400 MHz, CDCl<sub>3</sub>) of Compound **3ia**

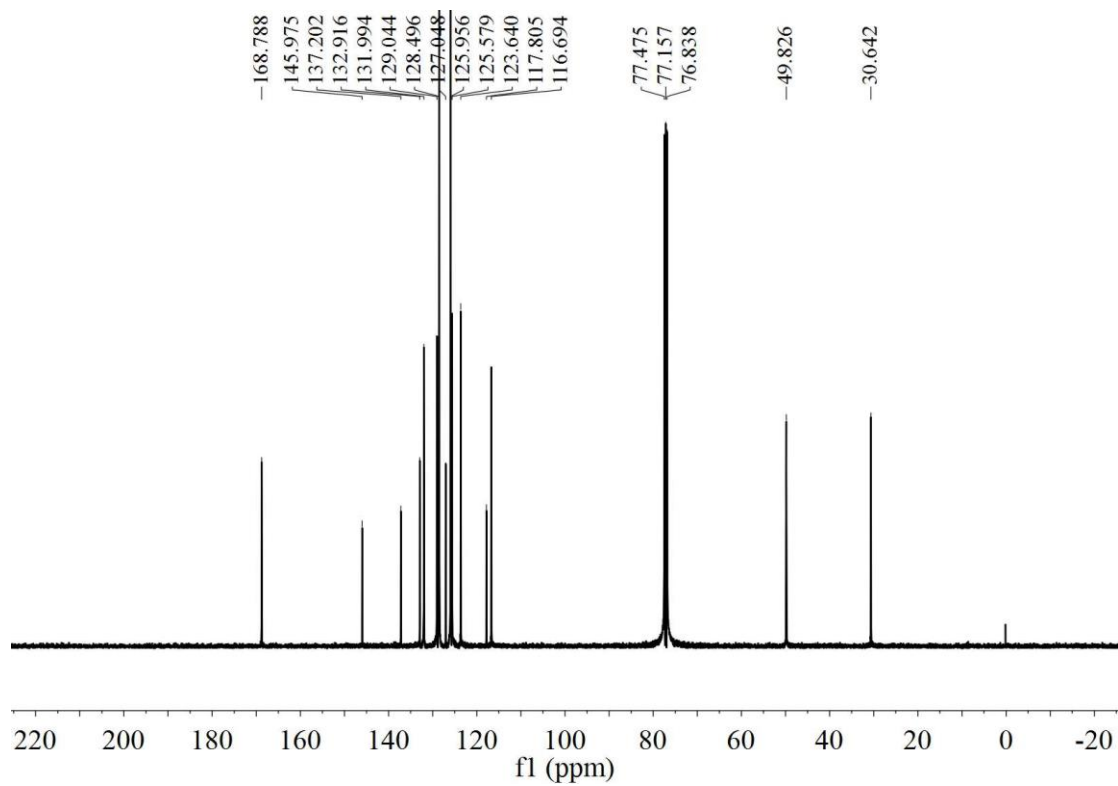

<sup>13</sup>C NMR Spectrum (100 MHz, CDCl<sub>3</sub>) of Compound **3ia**

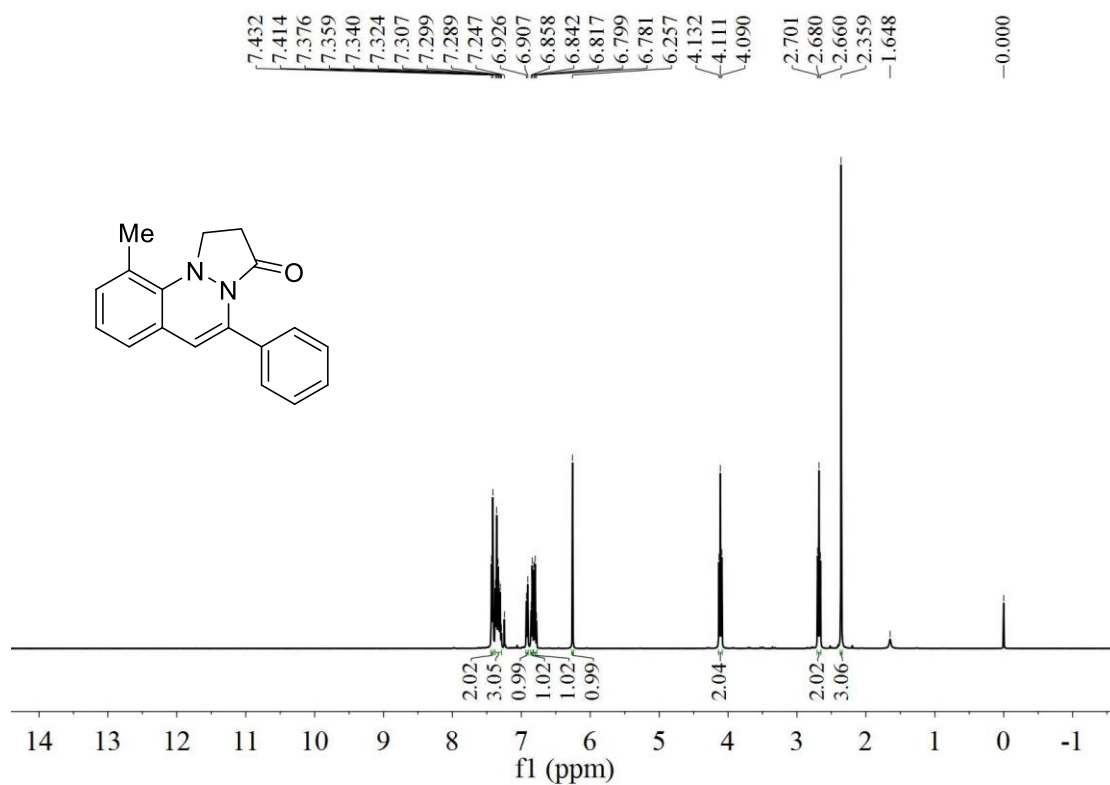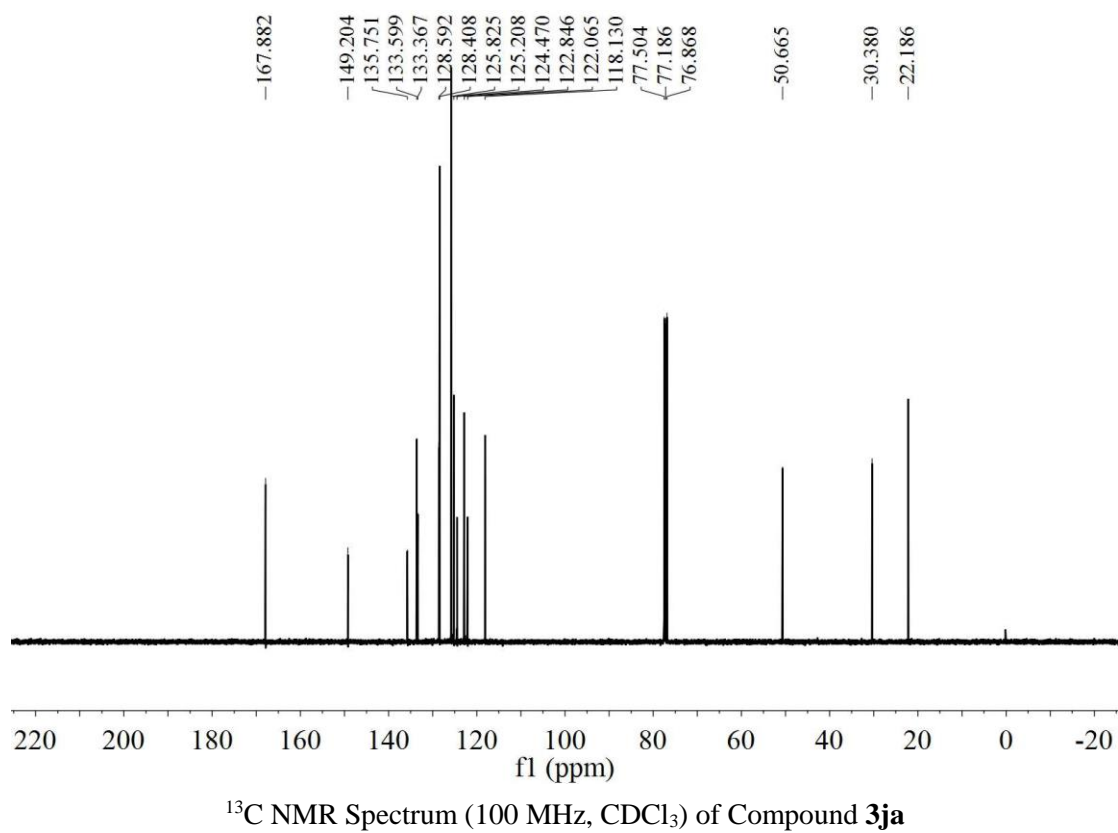

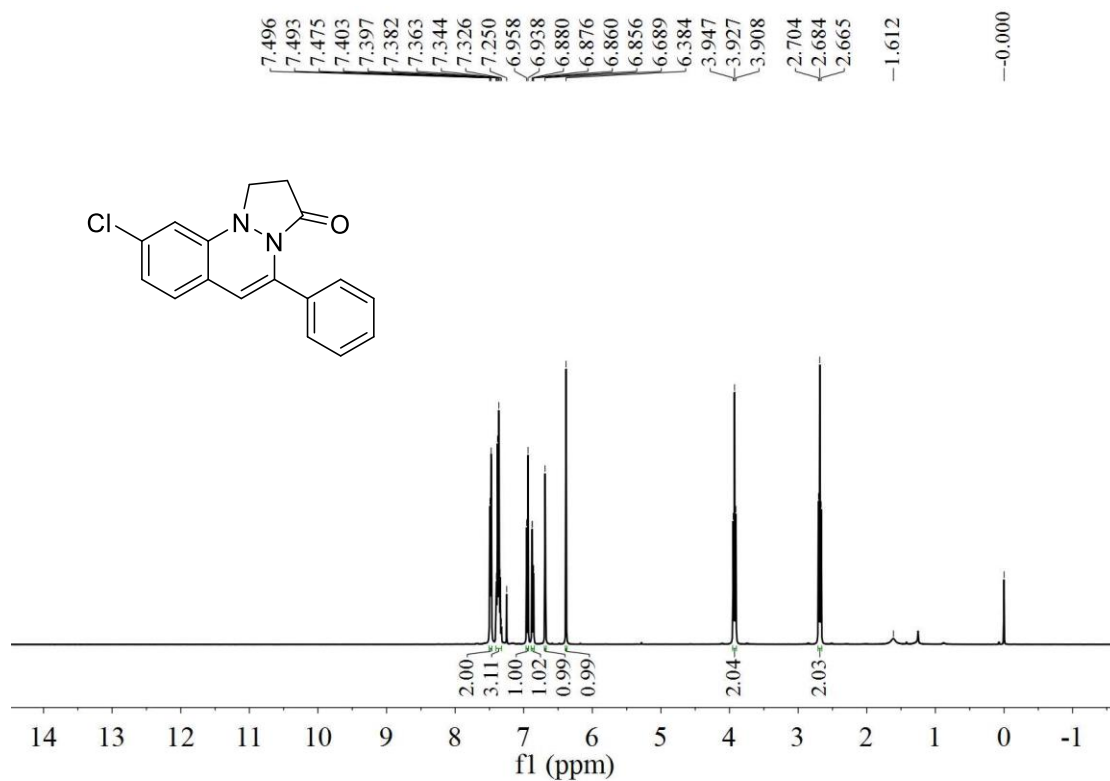

**<sup>1</sup>H NMR Spectrum (400 MHz, CDCl<sub>3</sub>) of Compound **3ka****

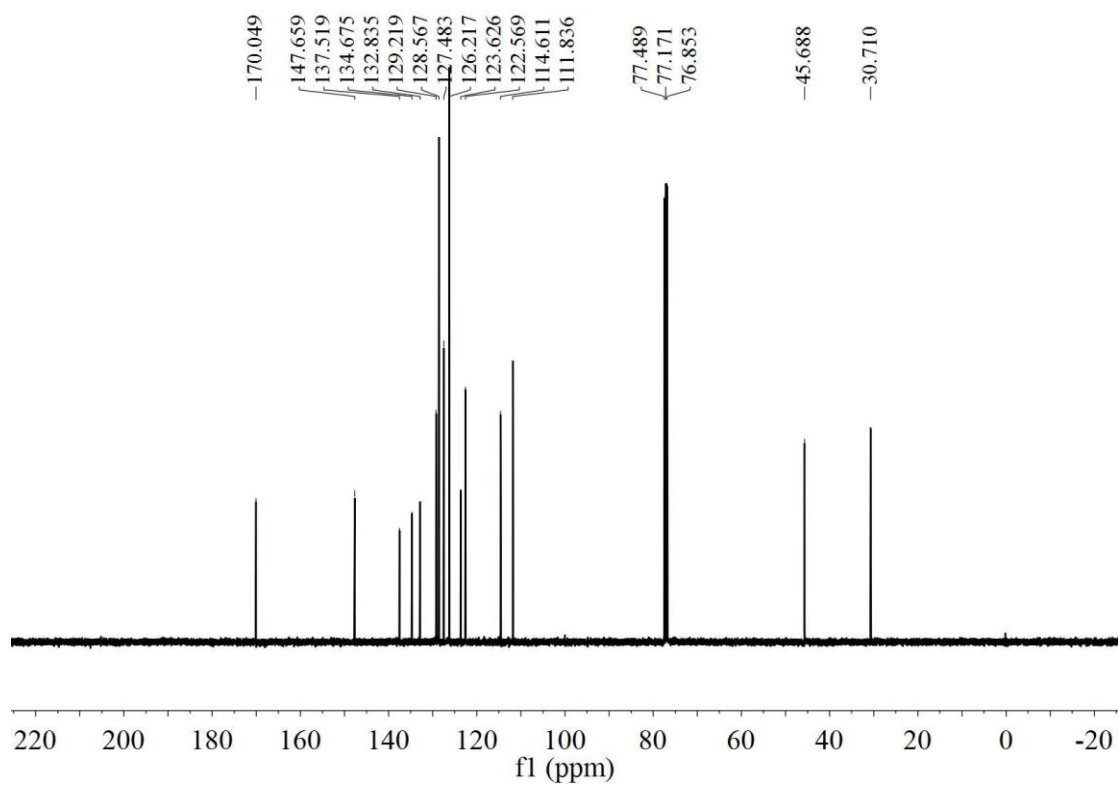

**<sup>13</sup>C NMR Spectrum (100 MHz, CDCl<sub>3</sub>) of Compound **3ka****

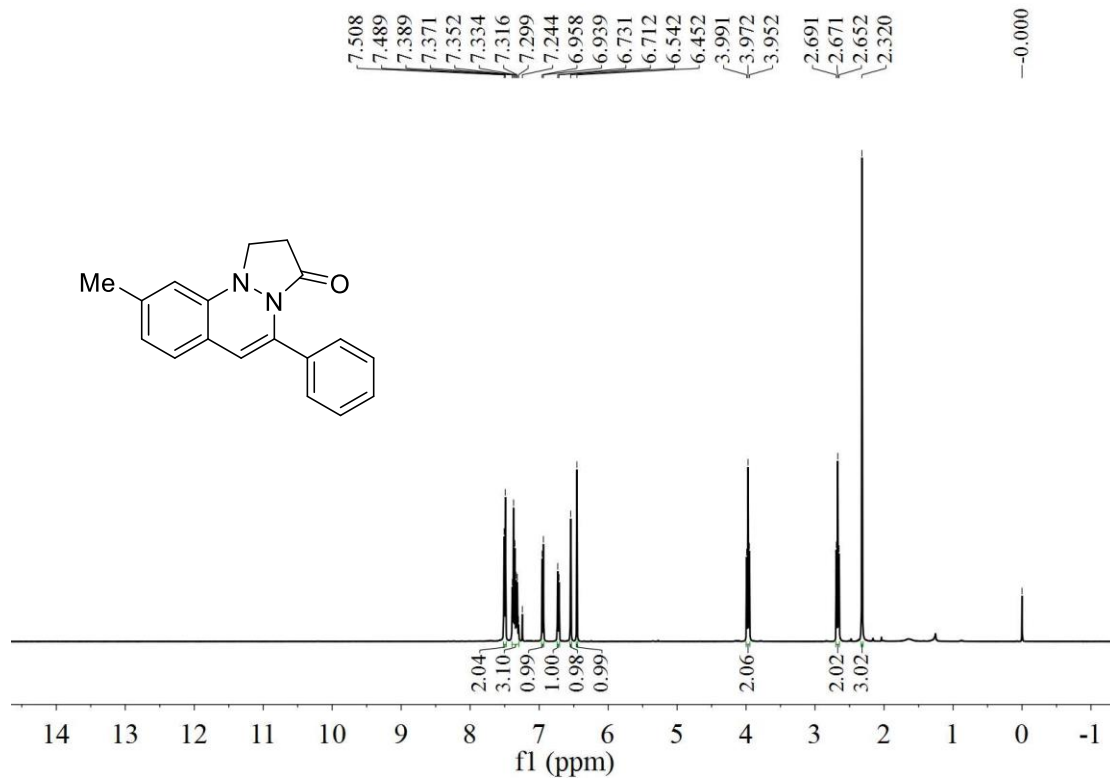

<sup>1</sup>H NMR Spectrum (400 MHz, CDCl<sub>3</sub>) of Compound **3la**

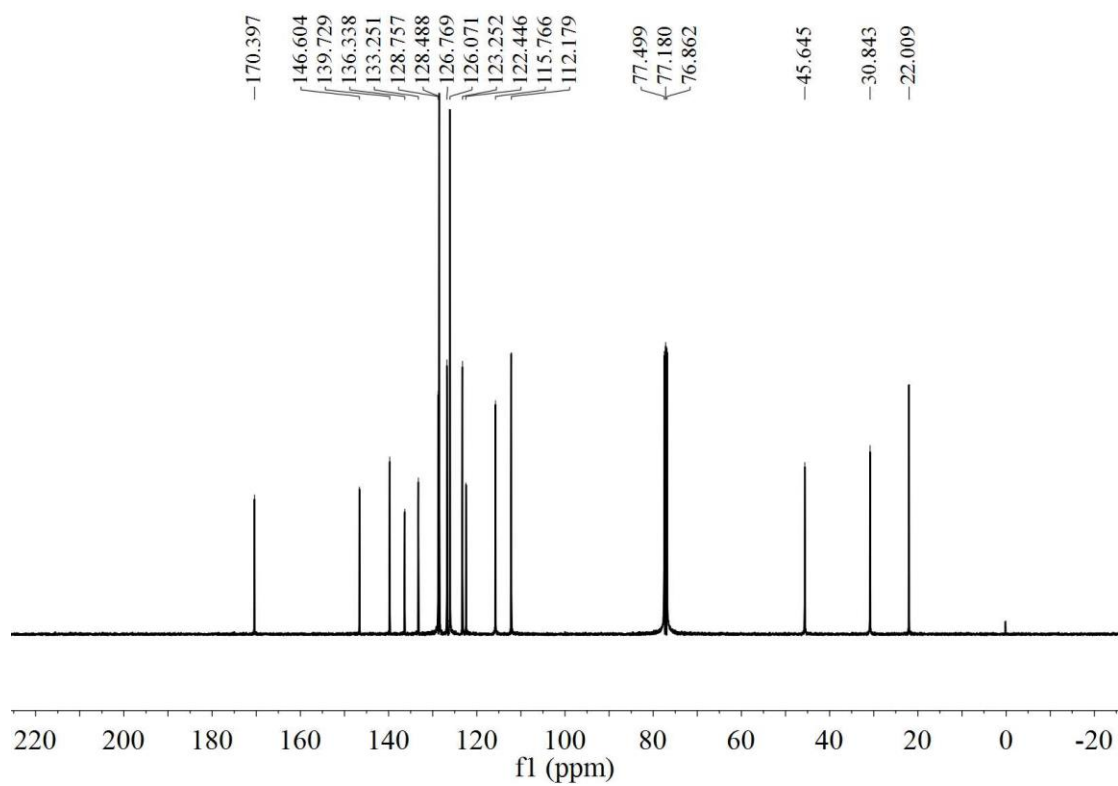

<sup>13</sup>C NMR Spectrum (100 MHz, CDCl<sub>3</sub>) of Compound **3la**



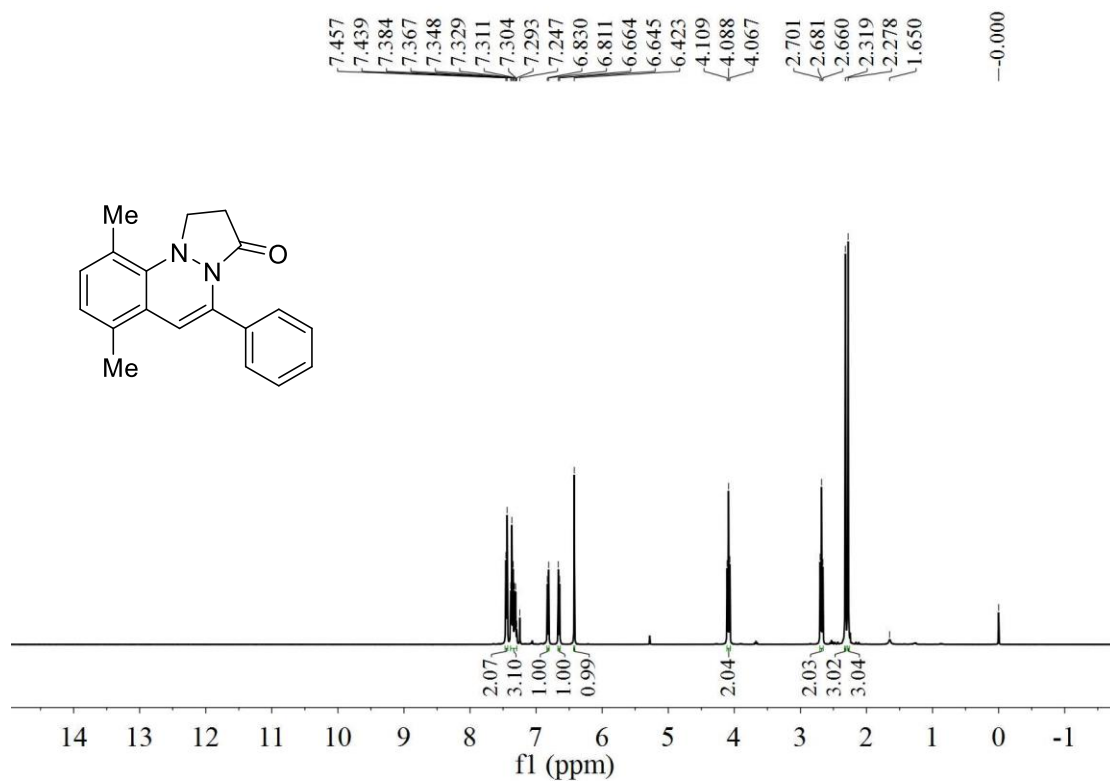

**<sup>1</sup>H NMR Spectrum (400 MHz, CDCl<sub>3</sub>) of Compound **3ma****

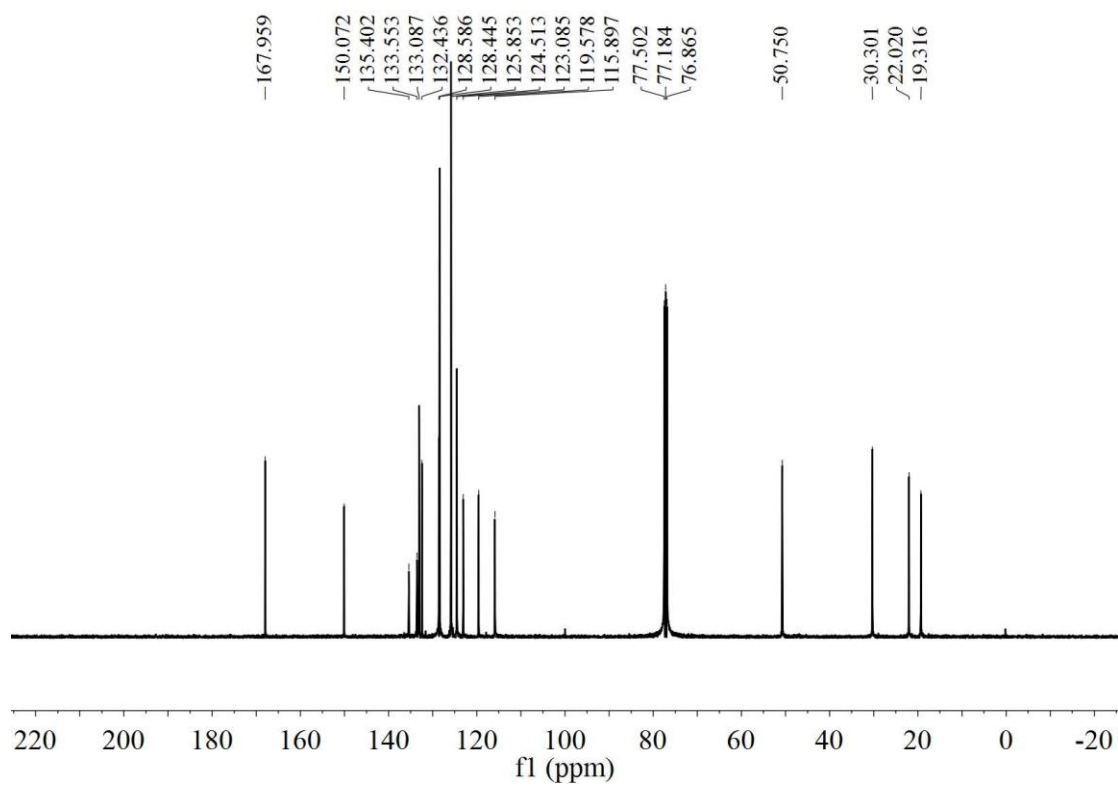

**<sup>13</sup>C NMR Spectrum (100 MHz, CDCl<sub>3</sub>) of Compound **3ma****

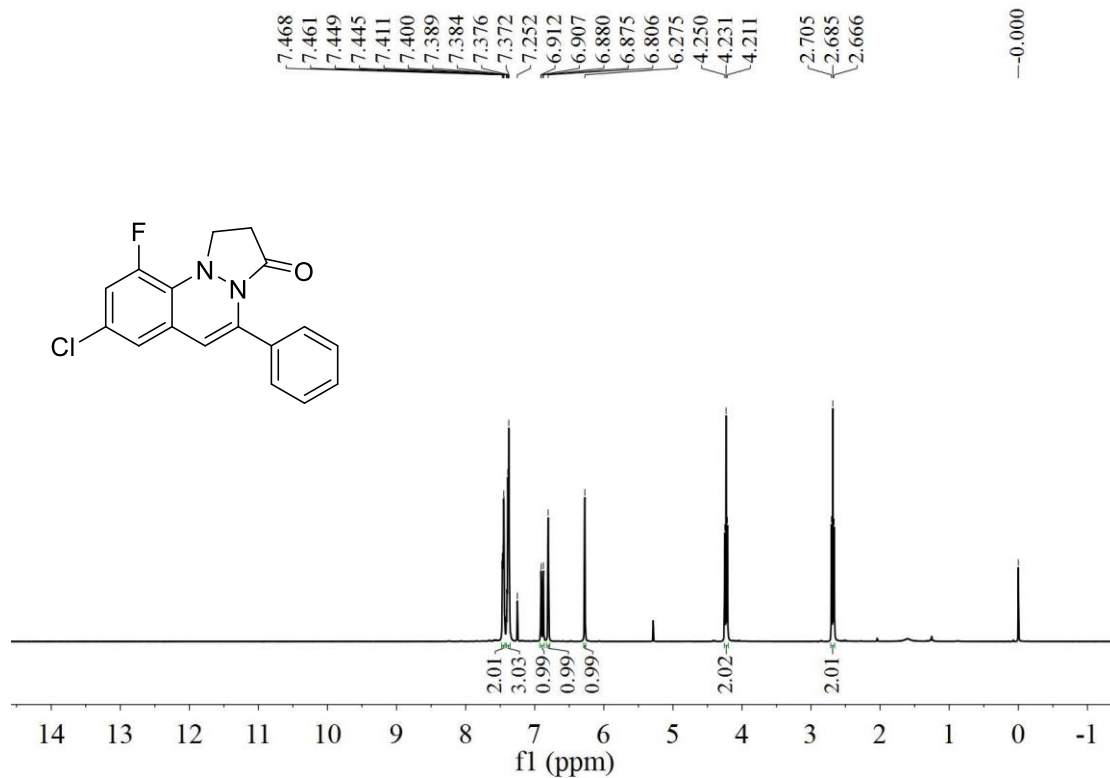

<sup>1</sup>H NMR Spectrum (400 MHz, CDCl<sub>3</sub>) of Compound 3na

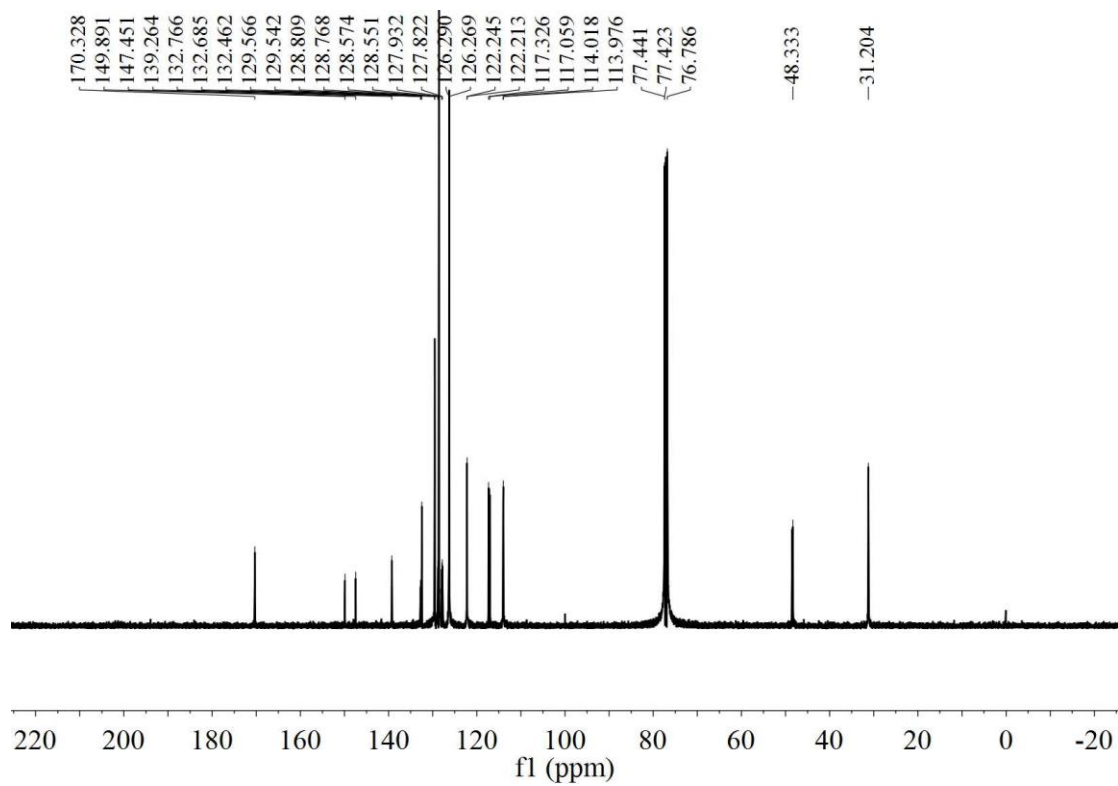

<sup>13</sup>C NMR Spectrum (100 MHz, CDCl<sub>3</sub>) of Compound 3na

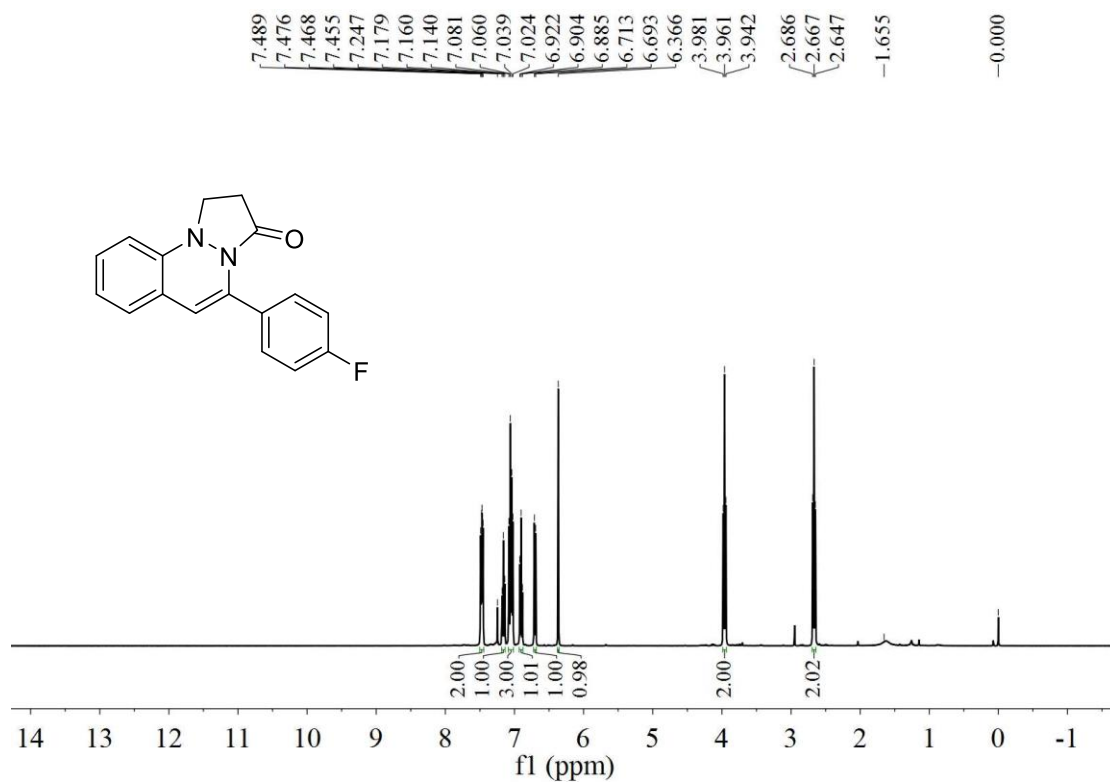

<sup>1</sup>H NMR Spectrum (400 MHz, CDCl<sub>3</sub>) of Compound **3ab**

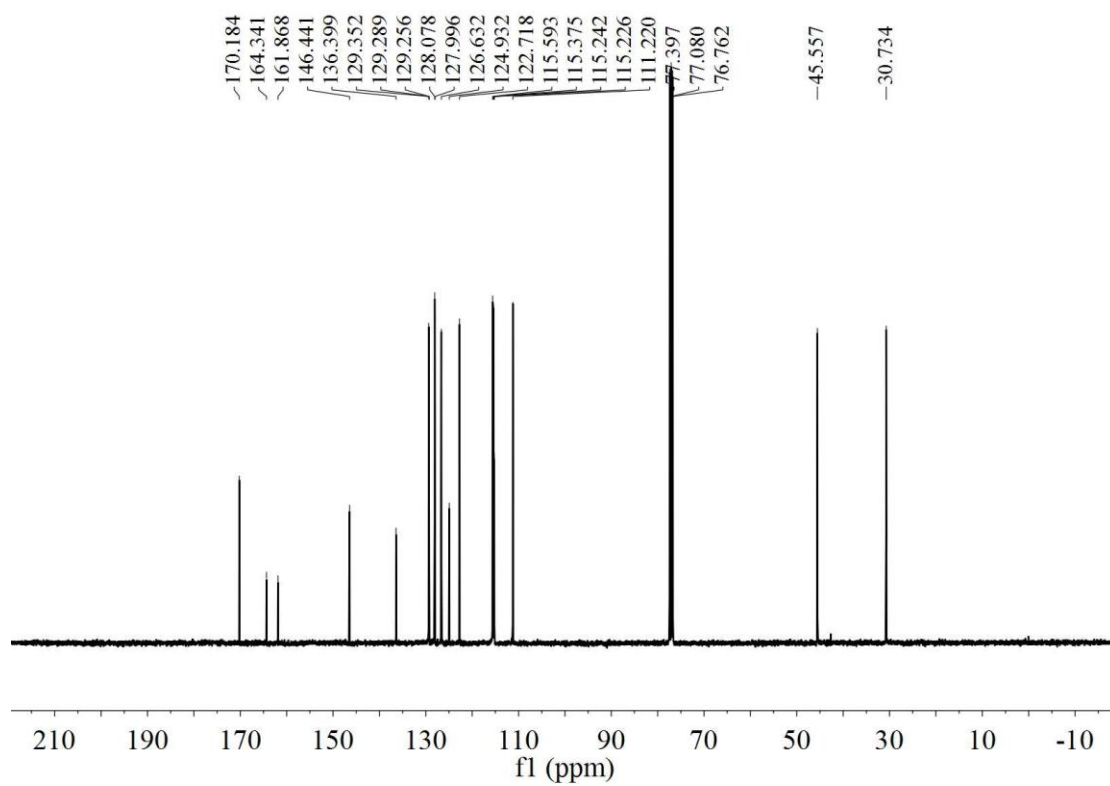

<sup>13</sup>C NMR Spectrum (100 MHz, CDCl<sub>3</sub>) of Compound **3ab**

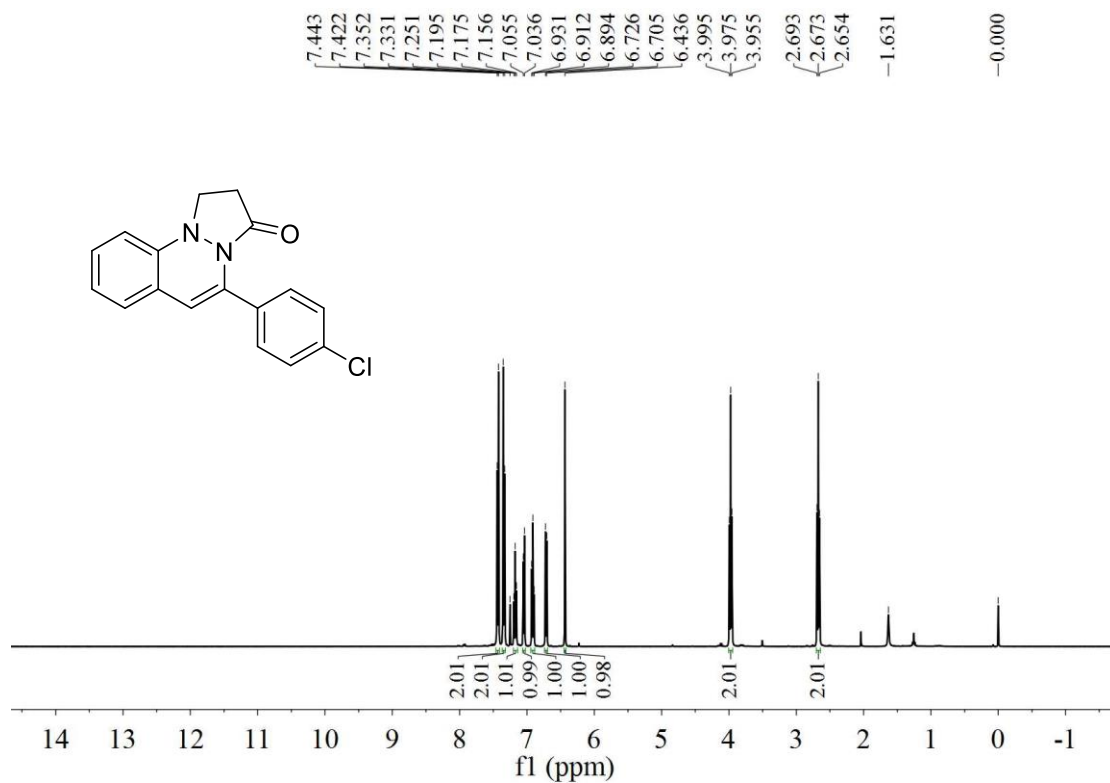

<sup>1</sup>H NMR Spectrum (400 MHz, CDCl<sub>3</sub>) of Compound 3ac

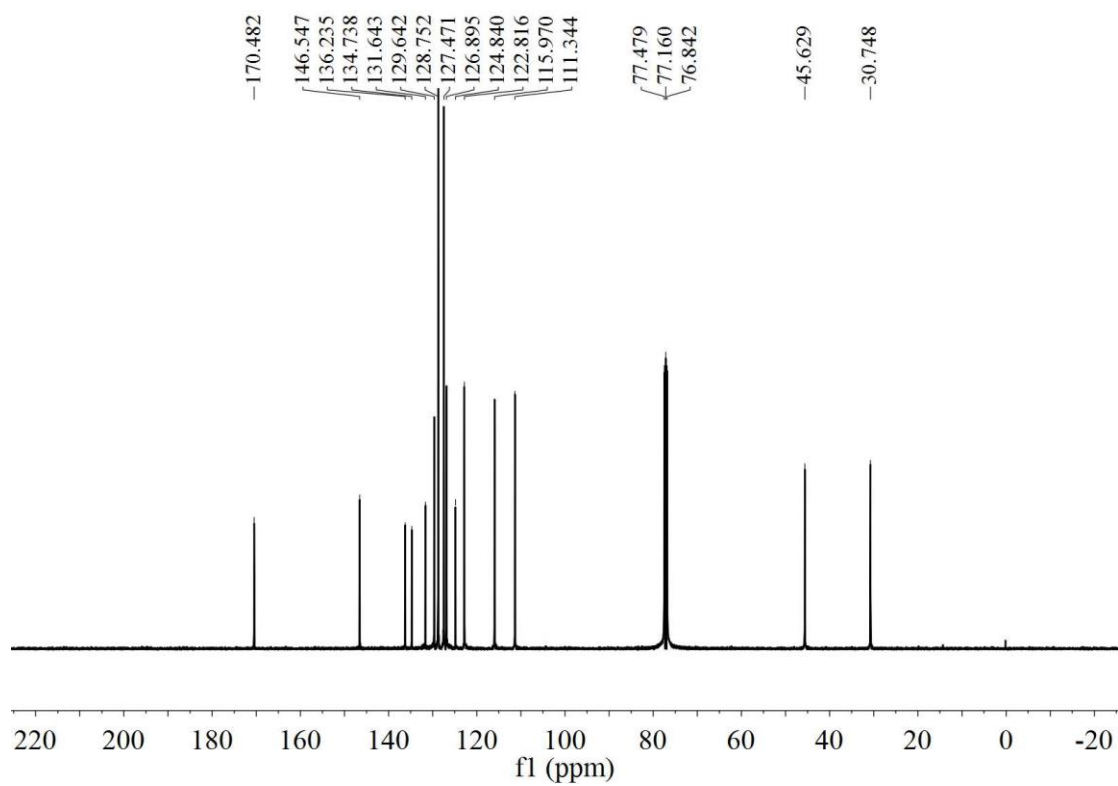

<sup>13</sup>C NMR Spectrum (100 MHz, CDCl<sub>3</sub>) of Compound 3ac

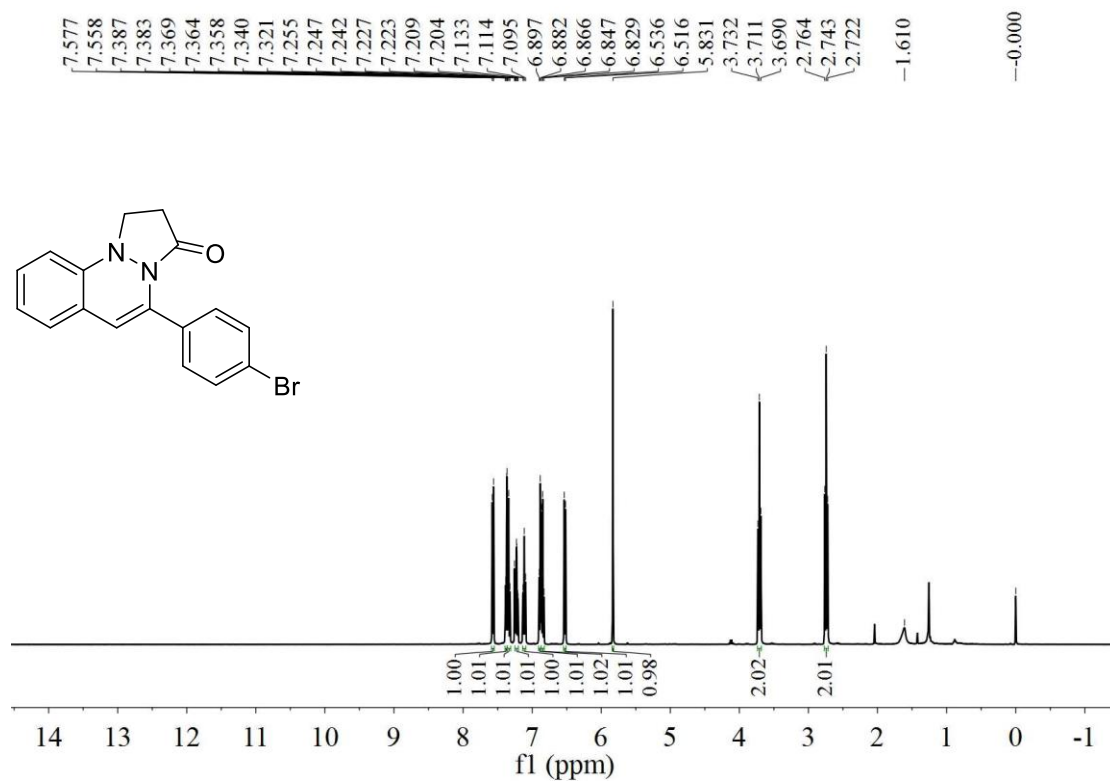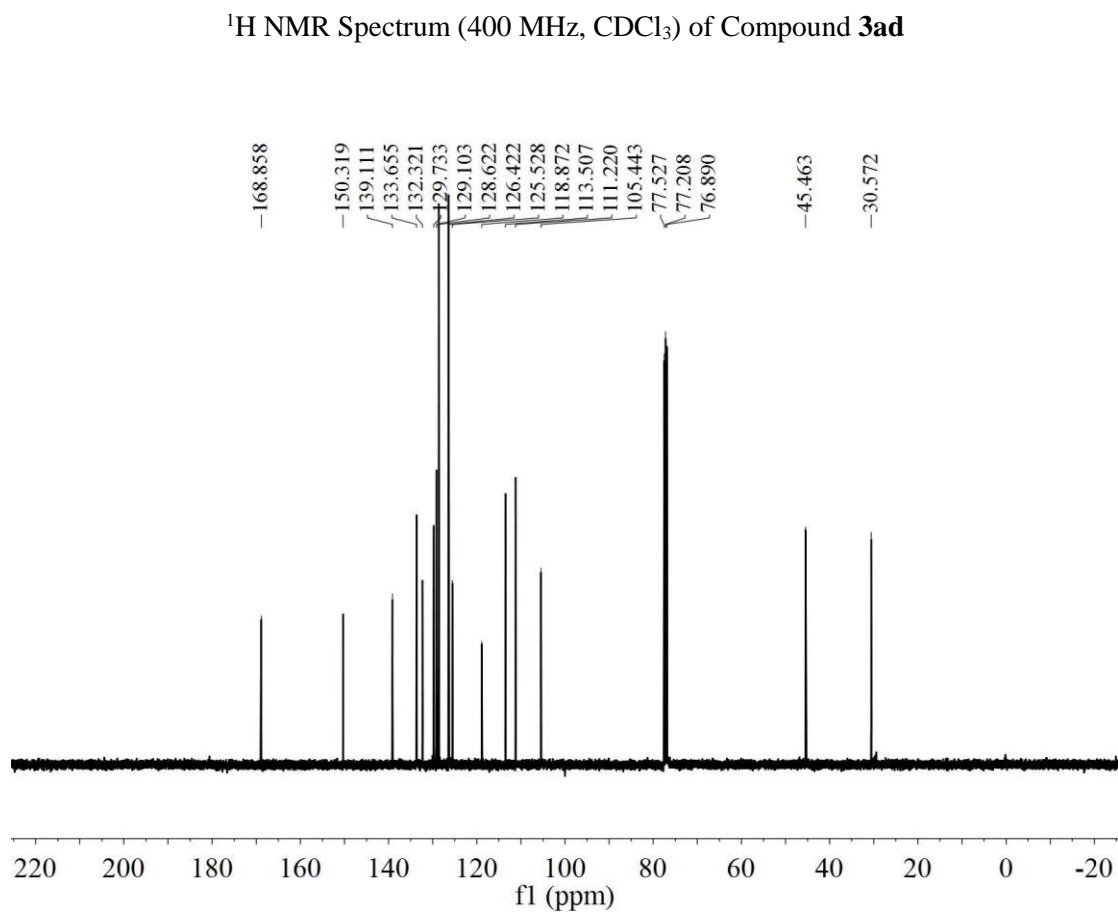

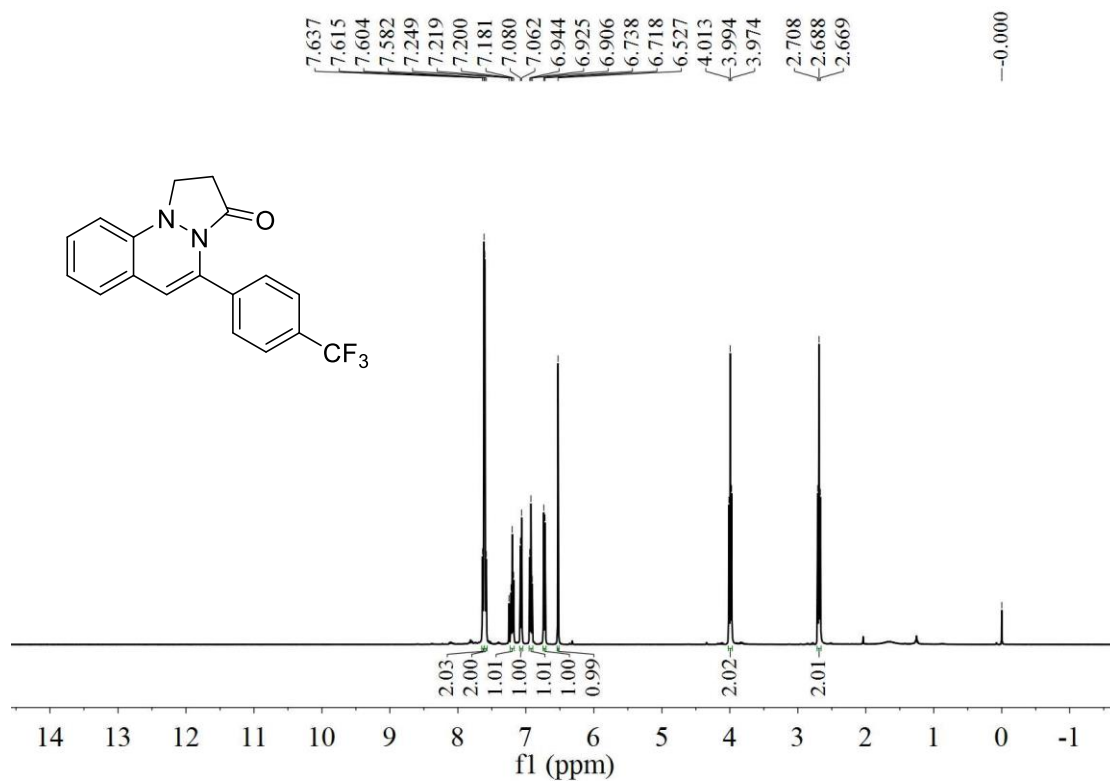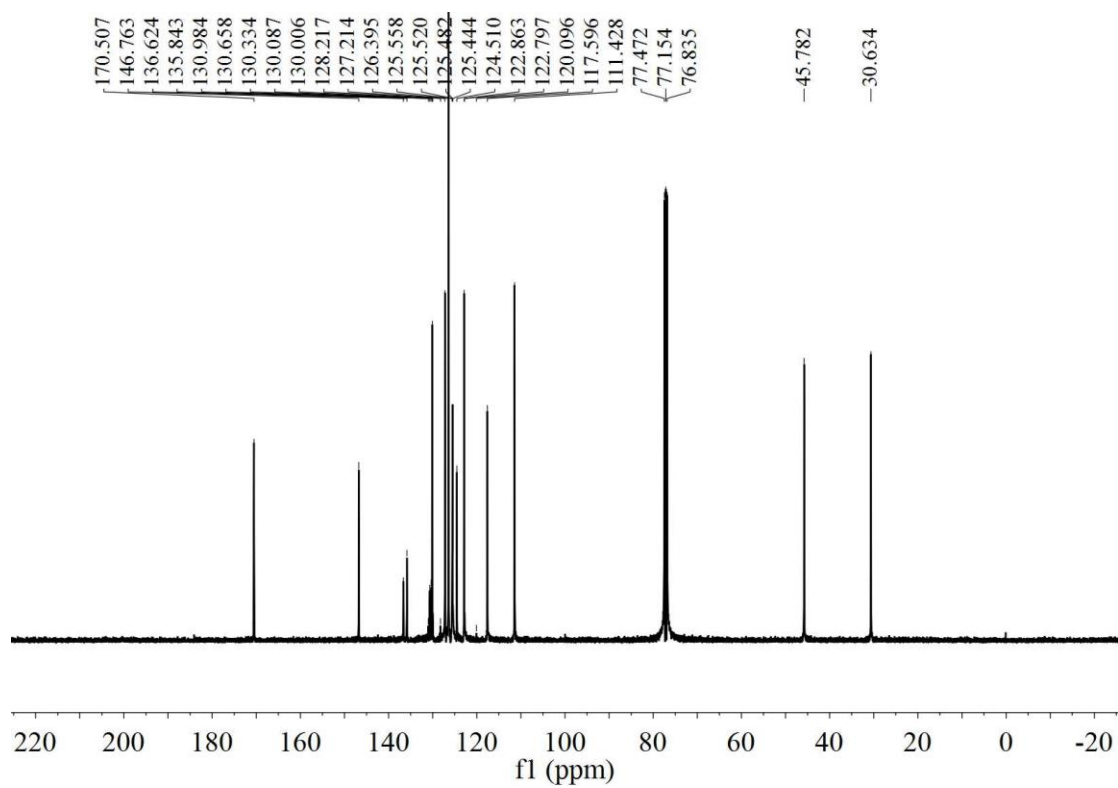

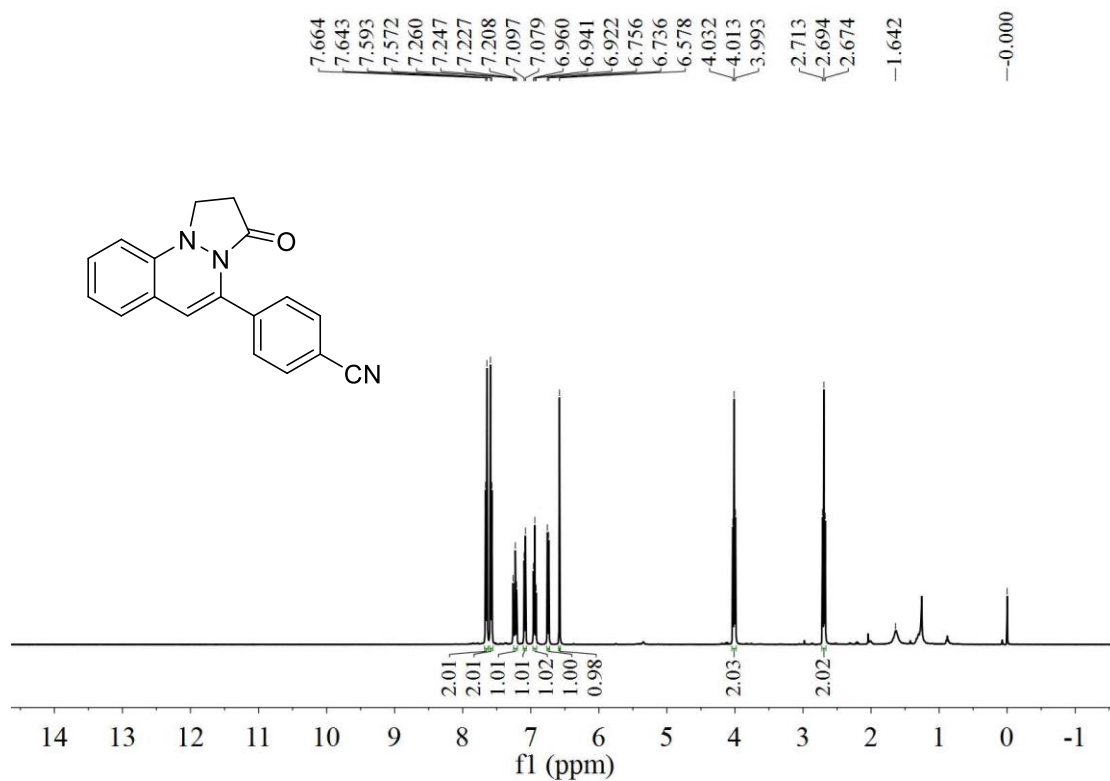

<sup>1</sup>H NMR Spectrum (400 MHz, CDCl<sub>3</sub>) of Compound **3af**

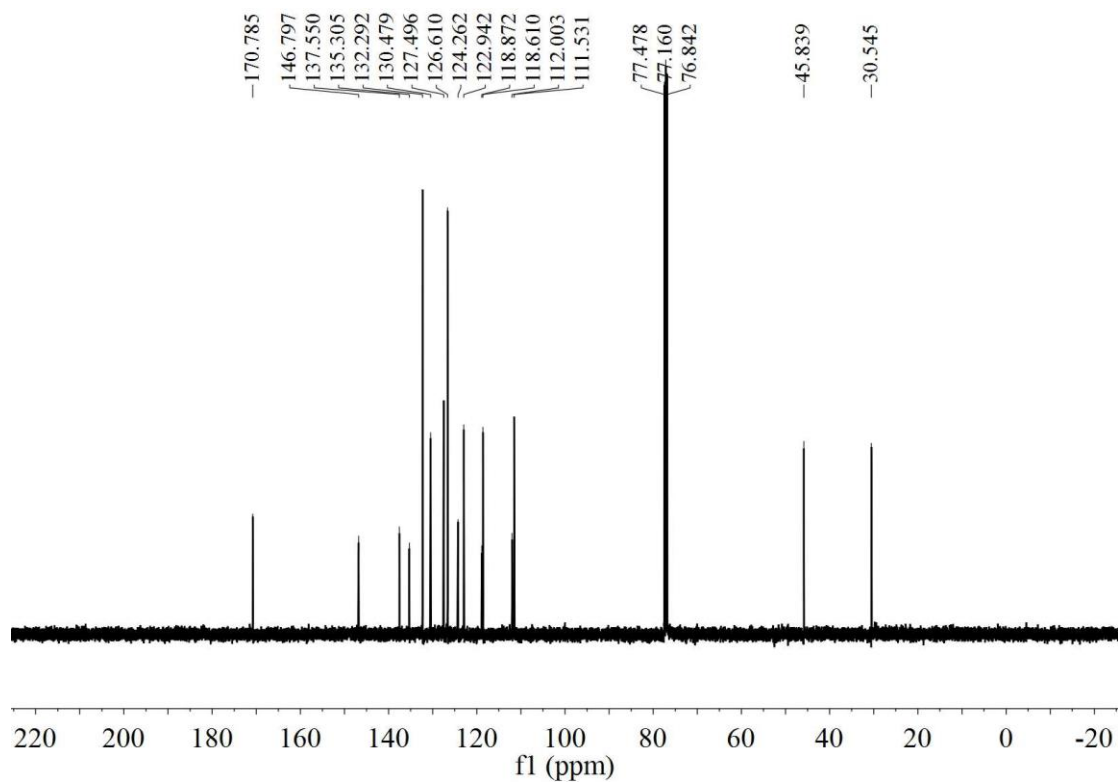

<sup>13</sup>C NMR Spectrum (100 MHz, CDCl<sub>3</sub>) of Compound **3af**

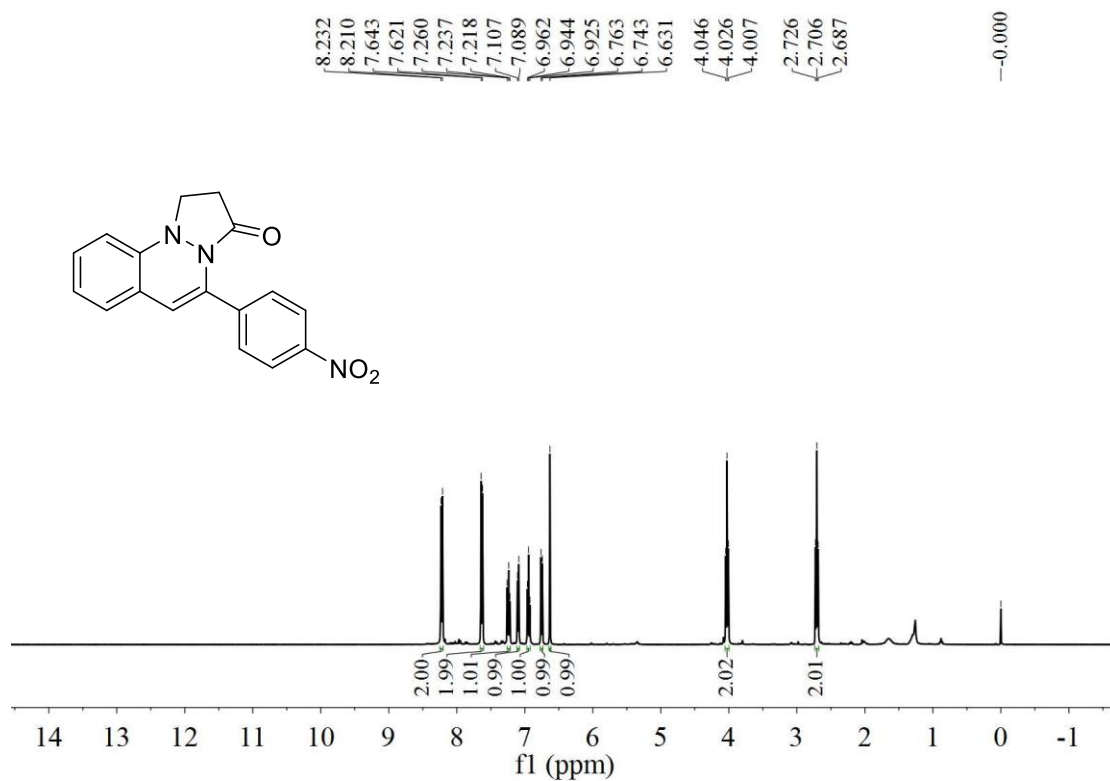

<sup>1</sup>H NMR Spectrum (400 MHz, CDCl<sub>3</sub>) of Compound **3ag**

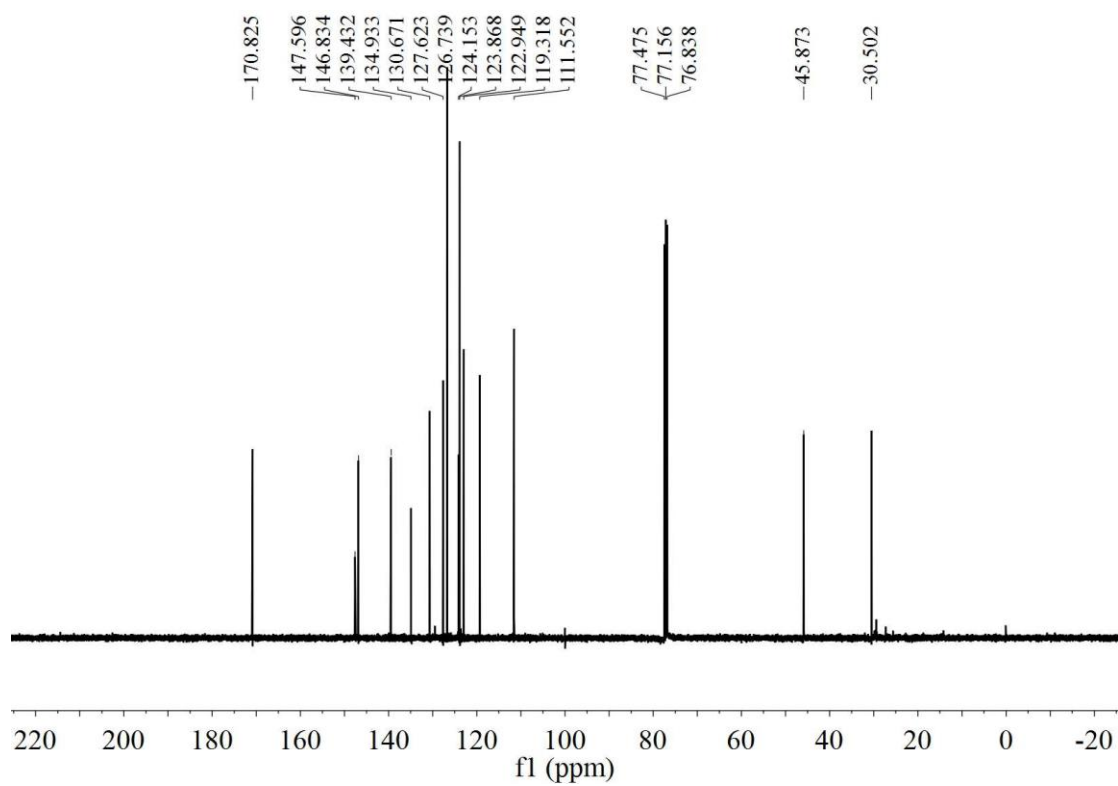

<sup>13</sup>C NMR Spectrum (100 MHz, CDCl<sub>3</sub>) of Compound **3ag**



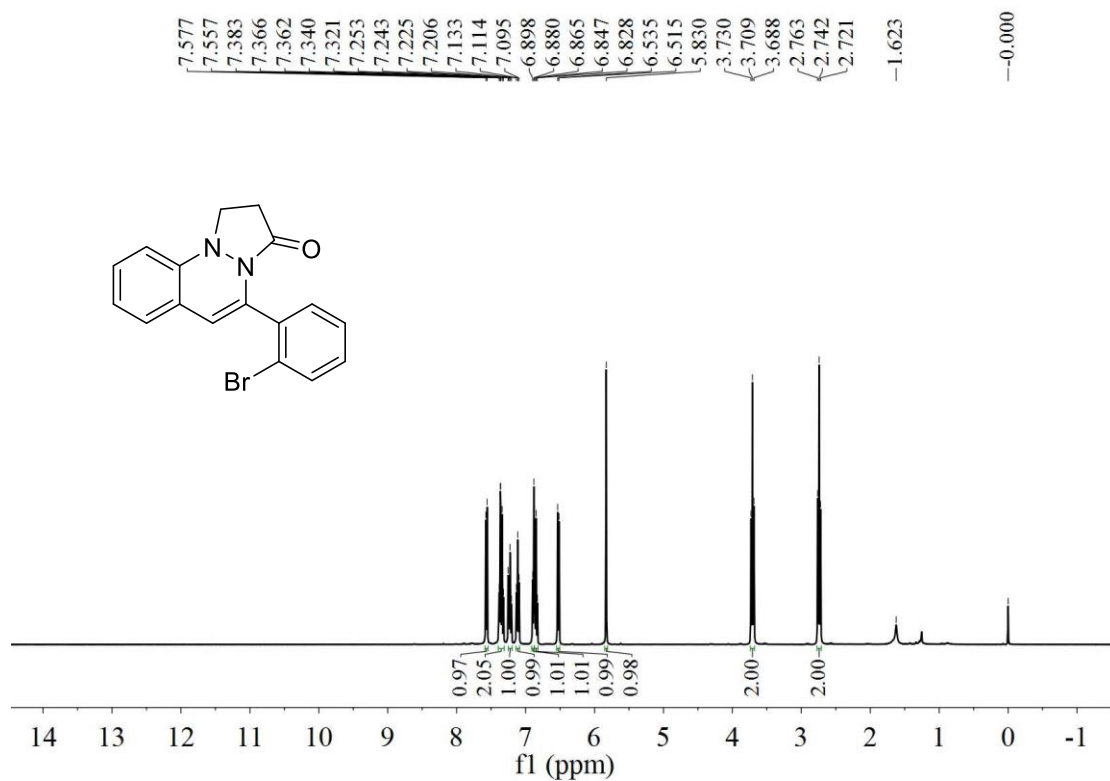

<sup>1</sup>H NMR Spectrum (400 MHz, CDCl<sub>3</sub>) of Compound **3ah**

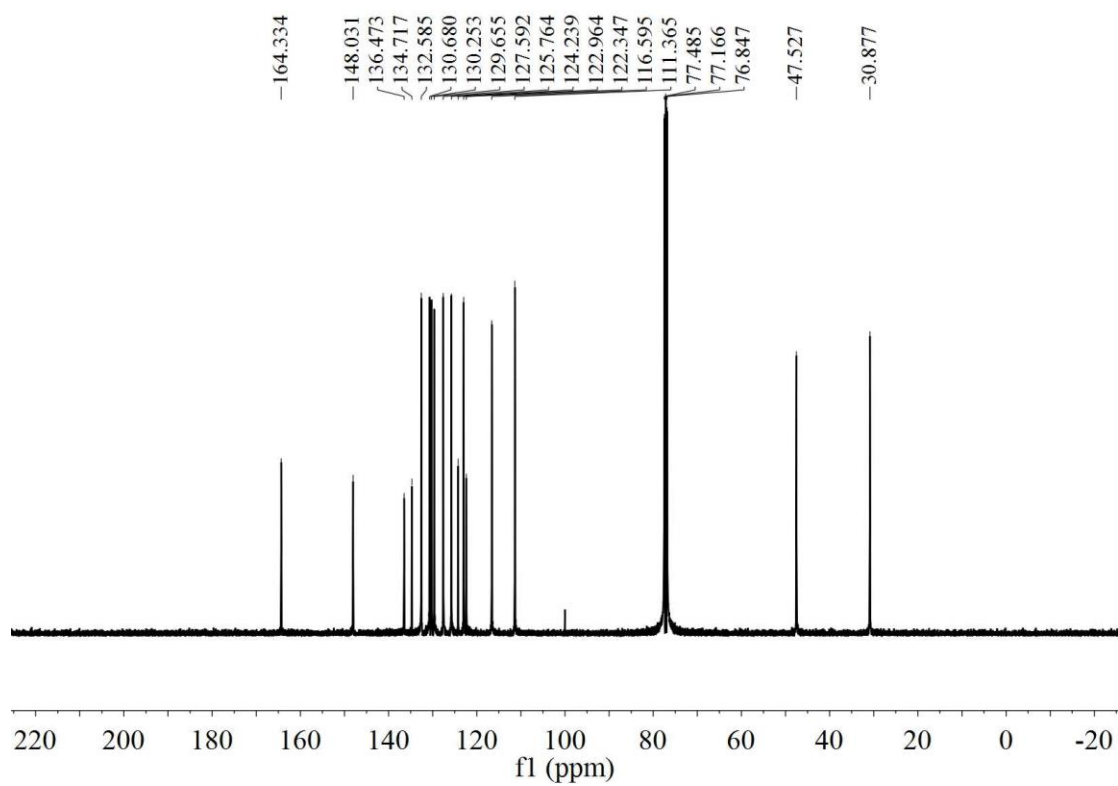

<sup>13</sup>C NMR Spectrum (100 MHz, CDCl<sub>3</sub>) of Compound **3ah**

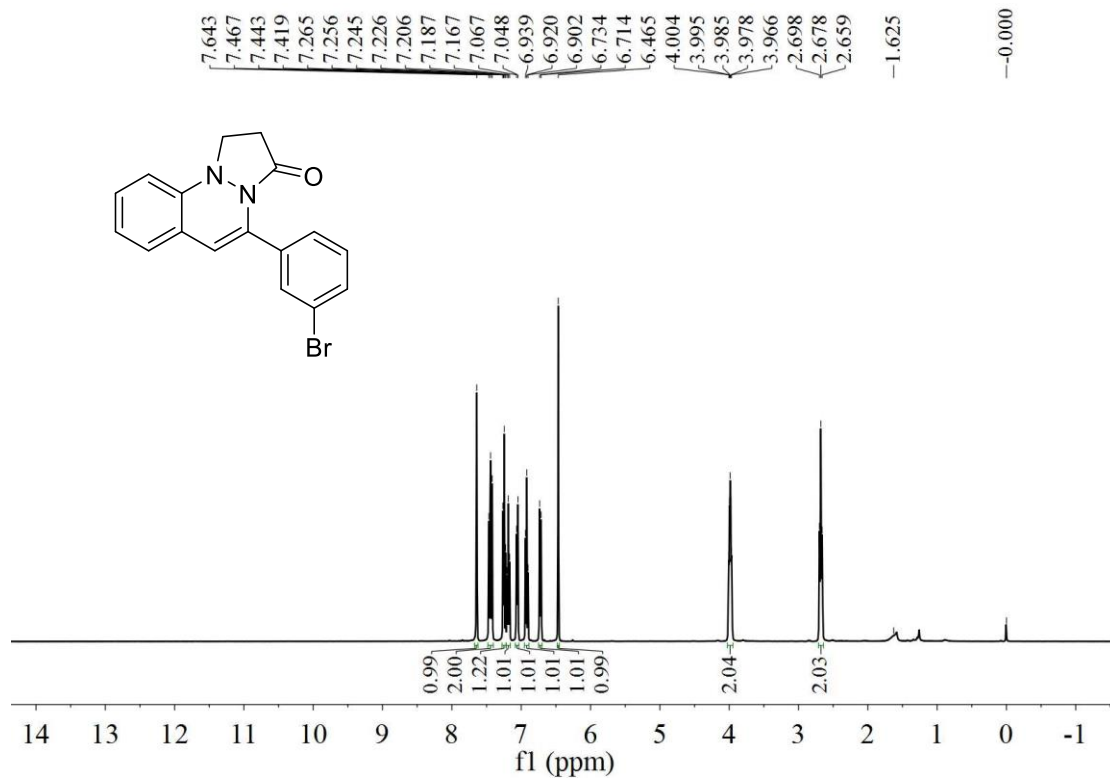

<sup>1</sup>H NMR Spectrum (400 MHz, CDCl<sub>3</sub>) of Compound **3ai**

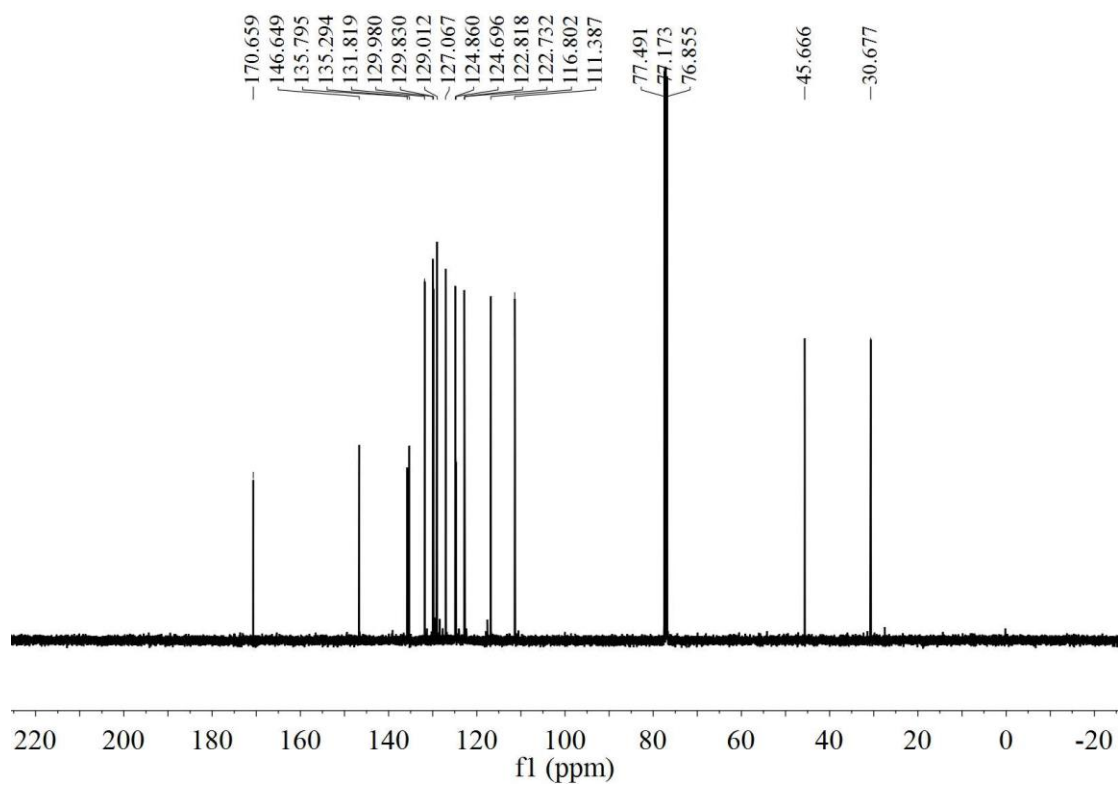

<sup>13</sup>C NMR Spectrum (100 MHz, CDCl<sub>3</sub>) of Compound **3ai**

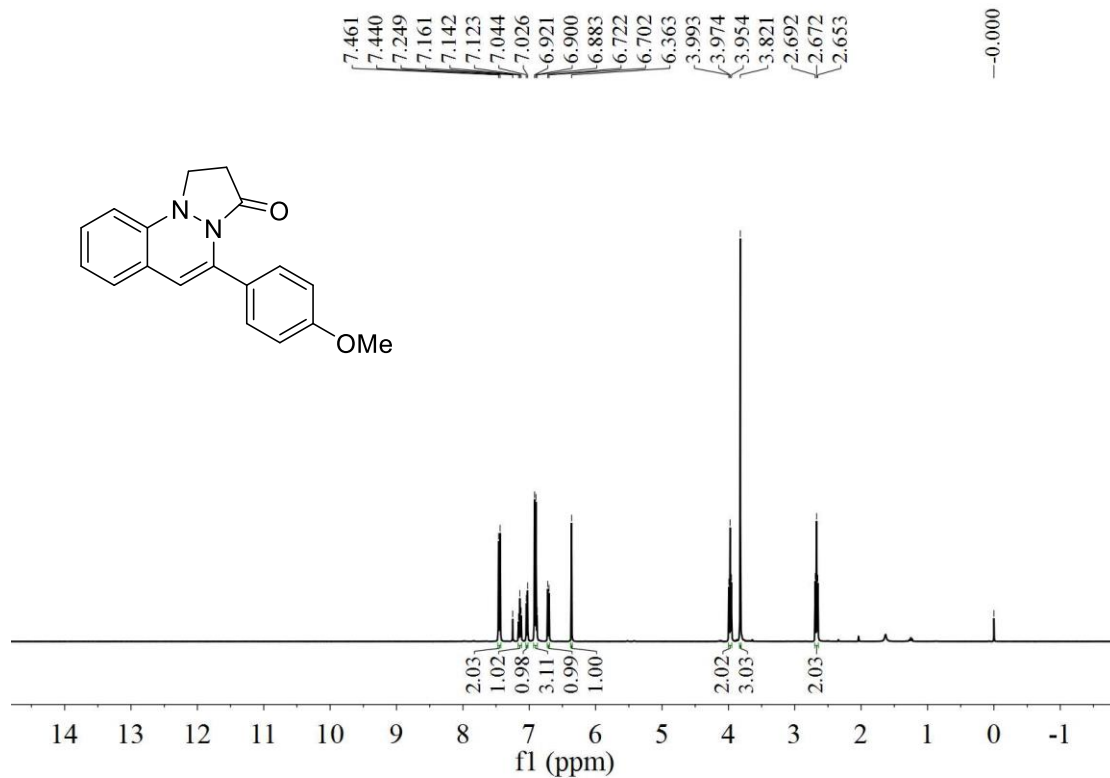

<sup>1</sup>H NMR Spectrum (400 MHz, CDCl<sub>3</sub>) of Compound 3aj

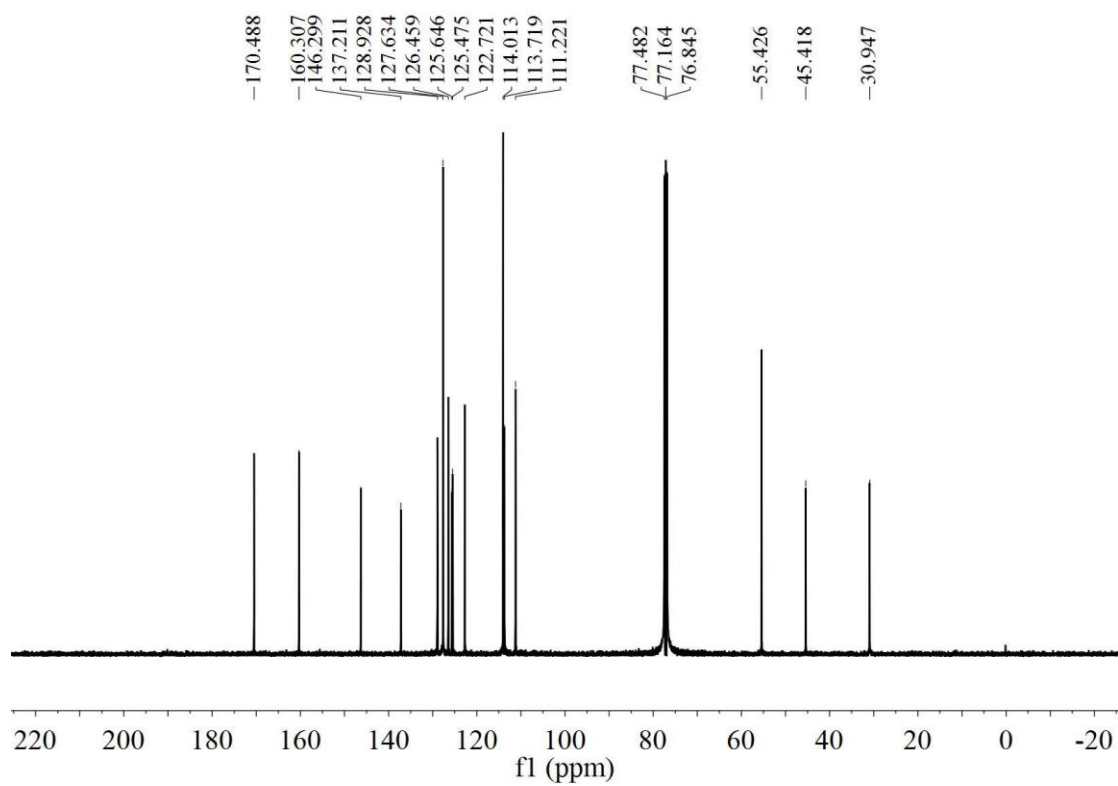

<sup>13</sup>C NMR Spectrum (100 MHz, CDCl<sub>3</sub>) of Compound 3aj

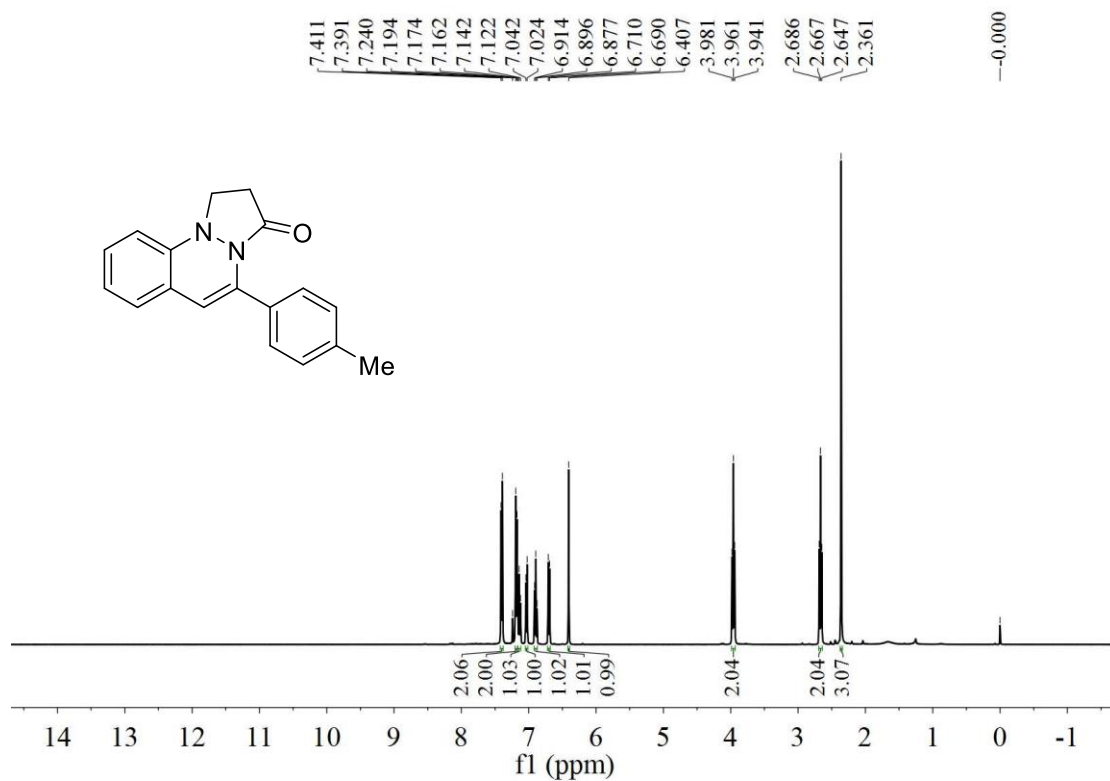

<sup>1</sup>H NMR Spectrum (400 MHz, CDCl<sub>3</sub>) of Compound **3ak**

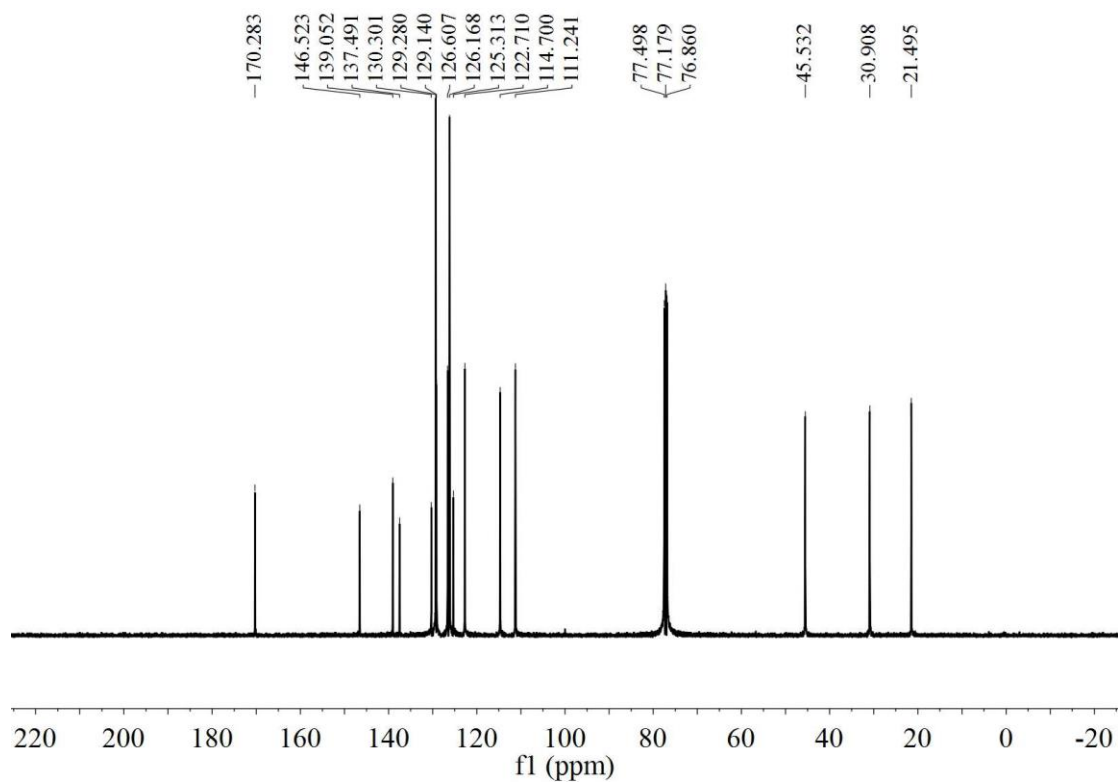

<sup>13</sup>C NMR Spectrum (100 MHz, CDCl<sub>3</sub>) of Compound **3ak**

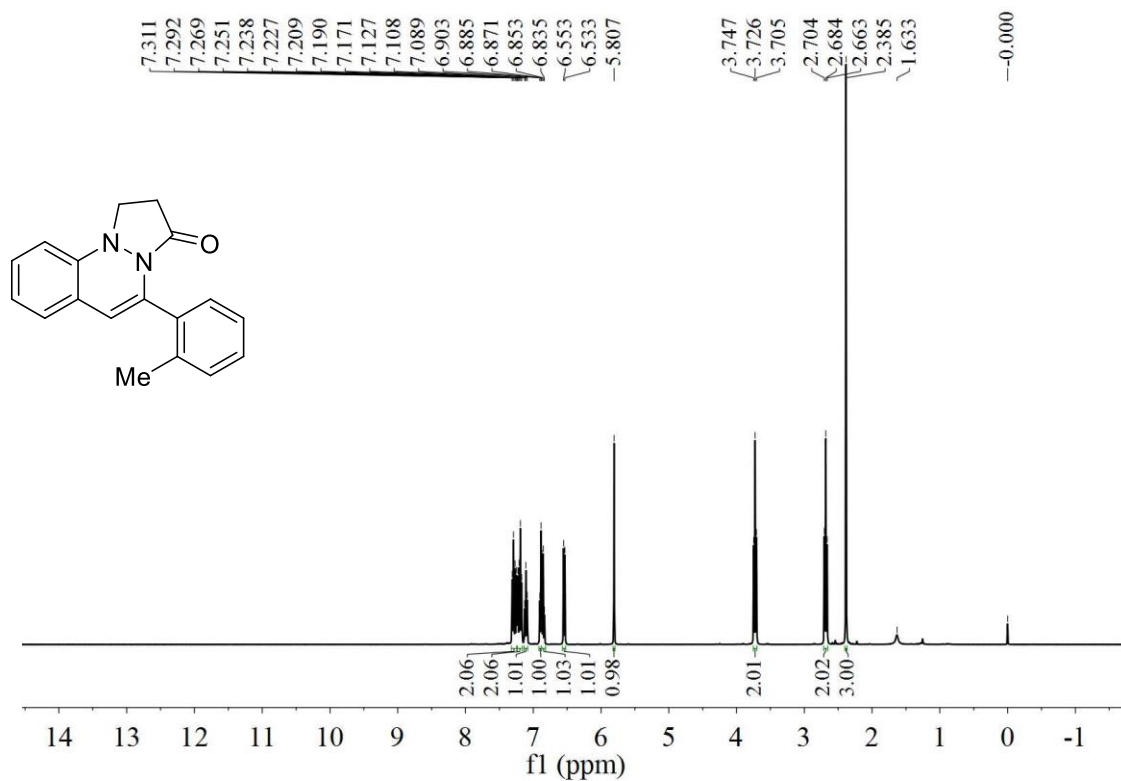

<sup>1</sup>H NMR Spectrum (400 MHz, CDCl<sub>3</sub>) of Compound **3al**

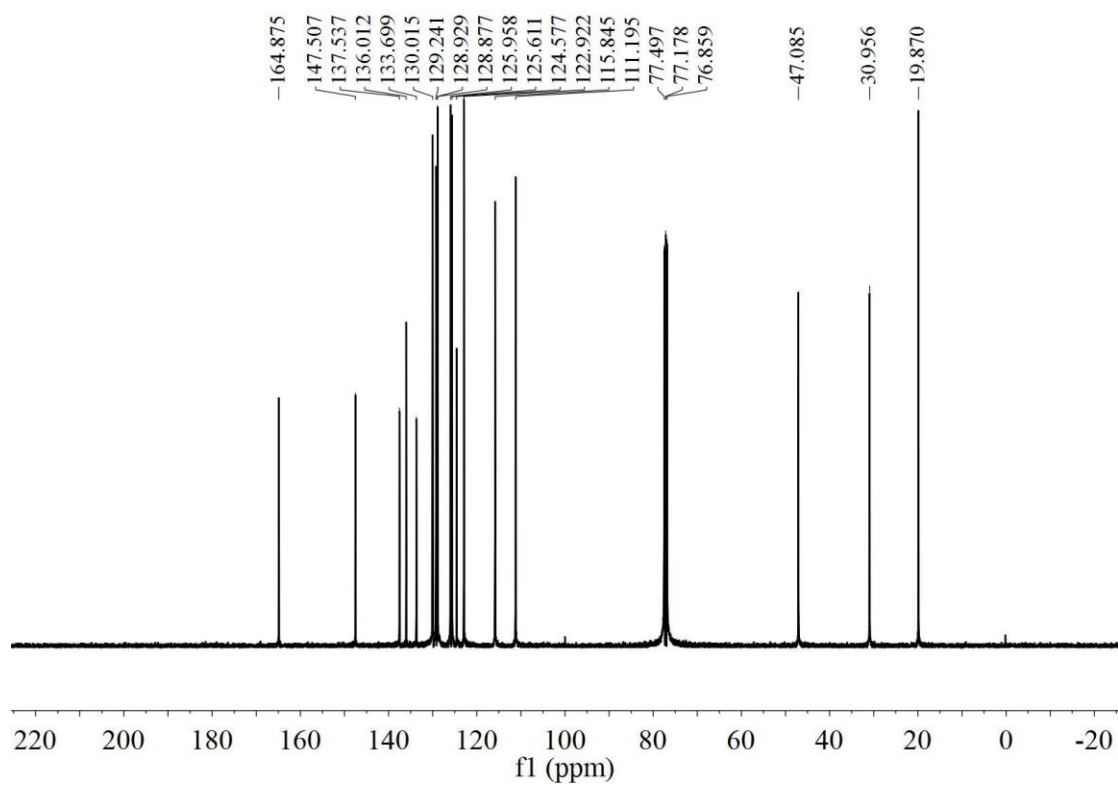

<sup>13</sup>C NMR Spectrum (100 MHz, CDCl<sub>3</sub>) of Compound **3al**

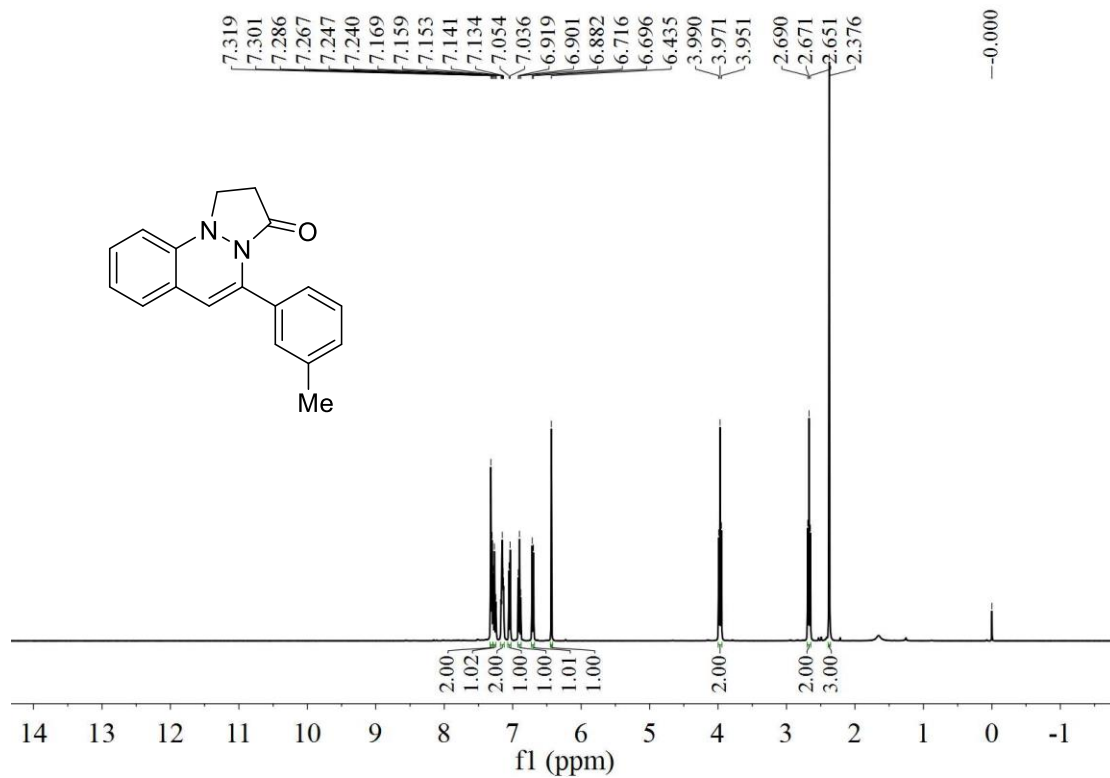

**<sup>1</sup>H NMR Spectrum (400 MHz, CDCl<sub>3</sub>) of Compound **3am****

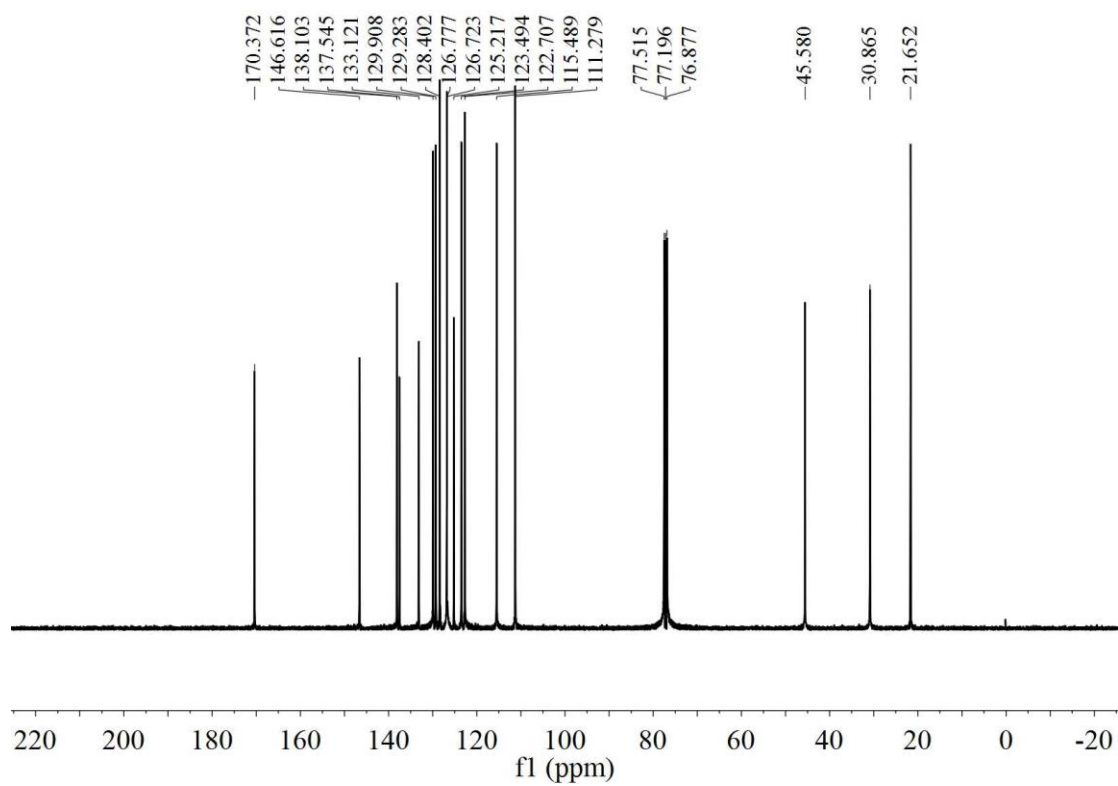

**<sup>13</sup>C NMR Spectrum (100 MHz, CDCl<sub>3</sub>) of Compound **3am****

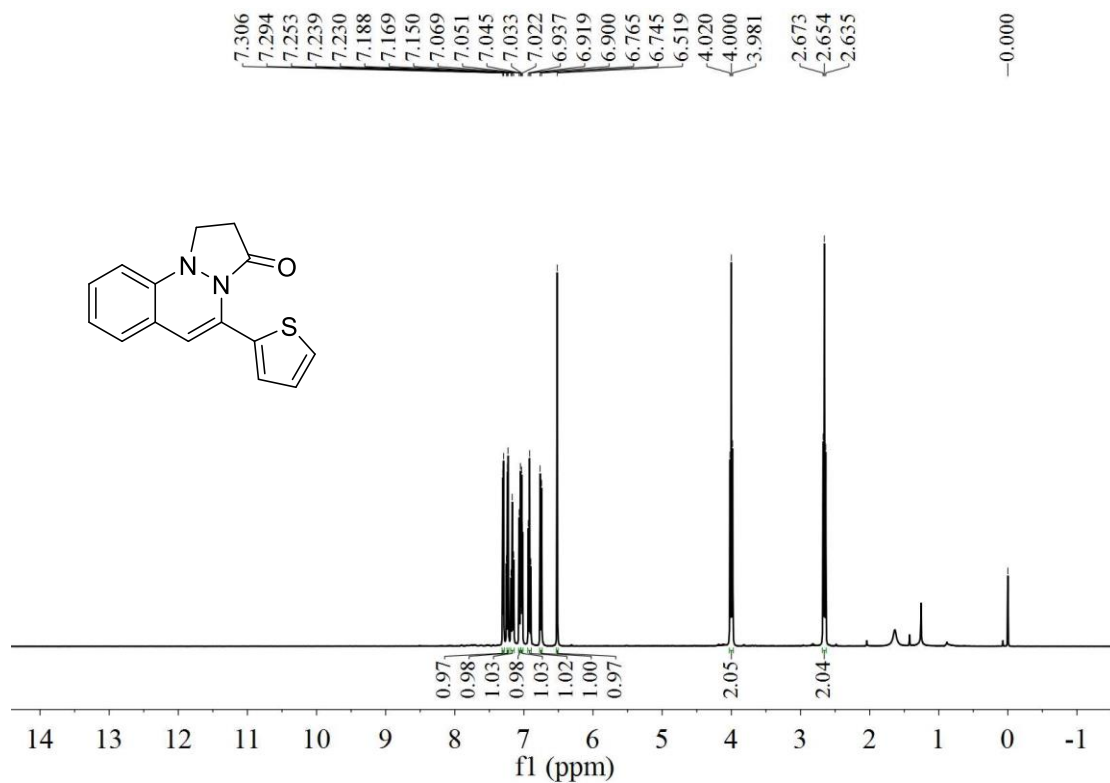

<sup>1</sup>H NMR Spectrum (400 MHz, CDCl<sub>3</sub>) of Compound **3an**

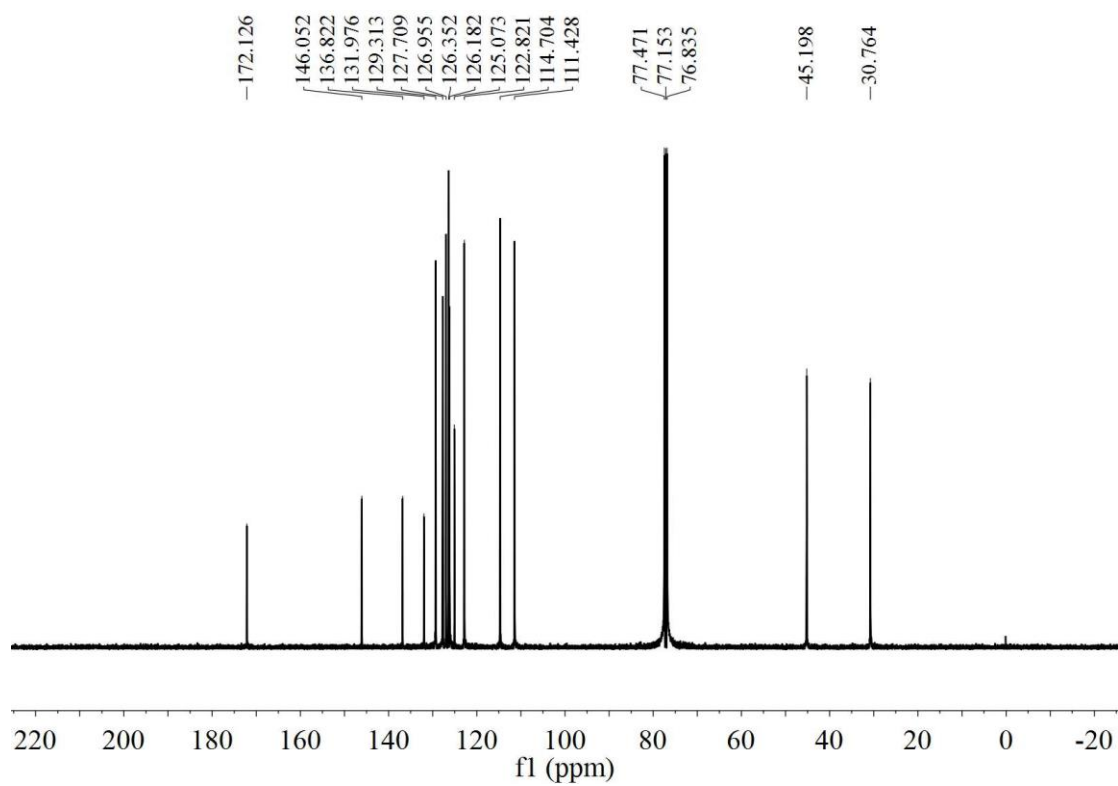

<sup>13</sup>C NMR Spectrum (100 MHz, CDCl<sub>3</sub>) of Compound **3an**

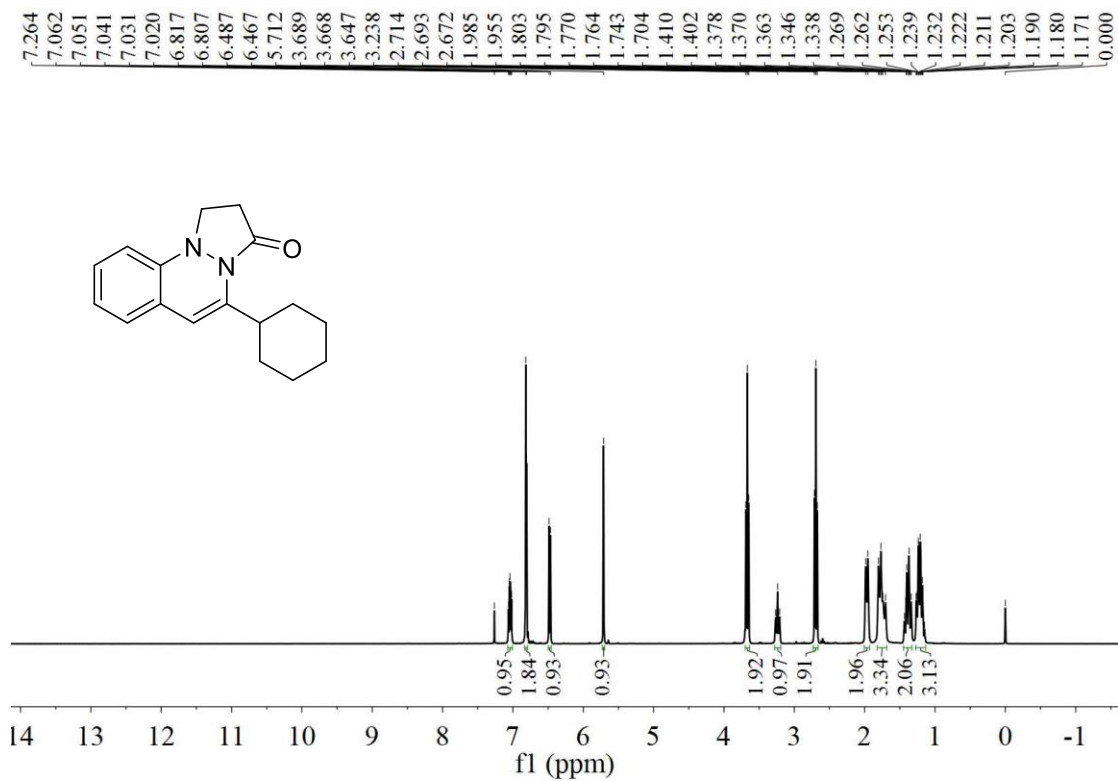

**<sup>1</sup>H NMR Spectrum (400 MHz, CDCl<sub>3</sub>) of Compound 3ao**

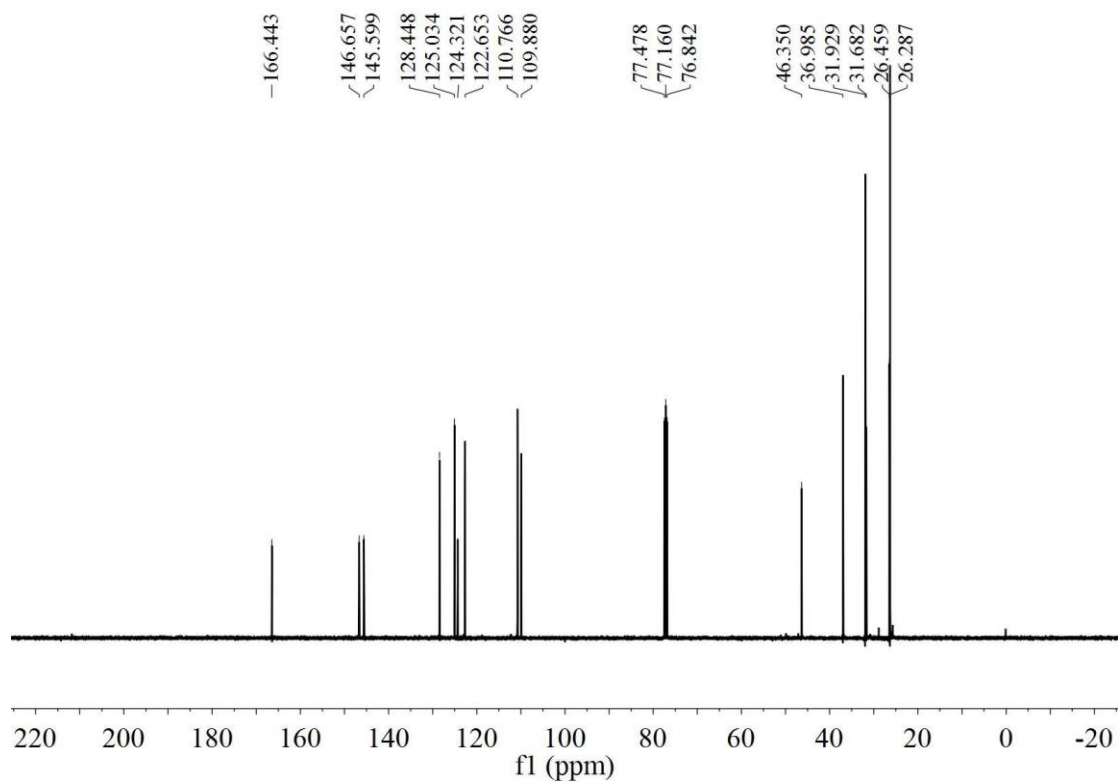

**<sup>13</sup>C NMR Spectrum (100 MHz, CDCl<sub>3</sub>) of Compound 3ao**



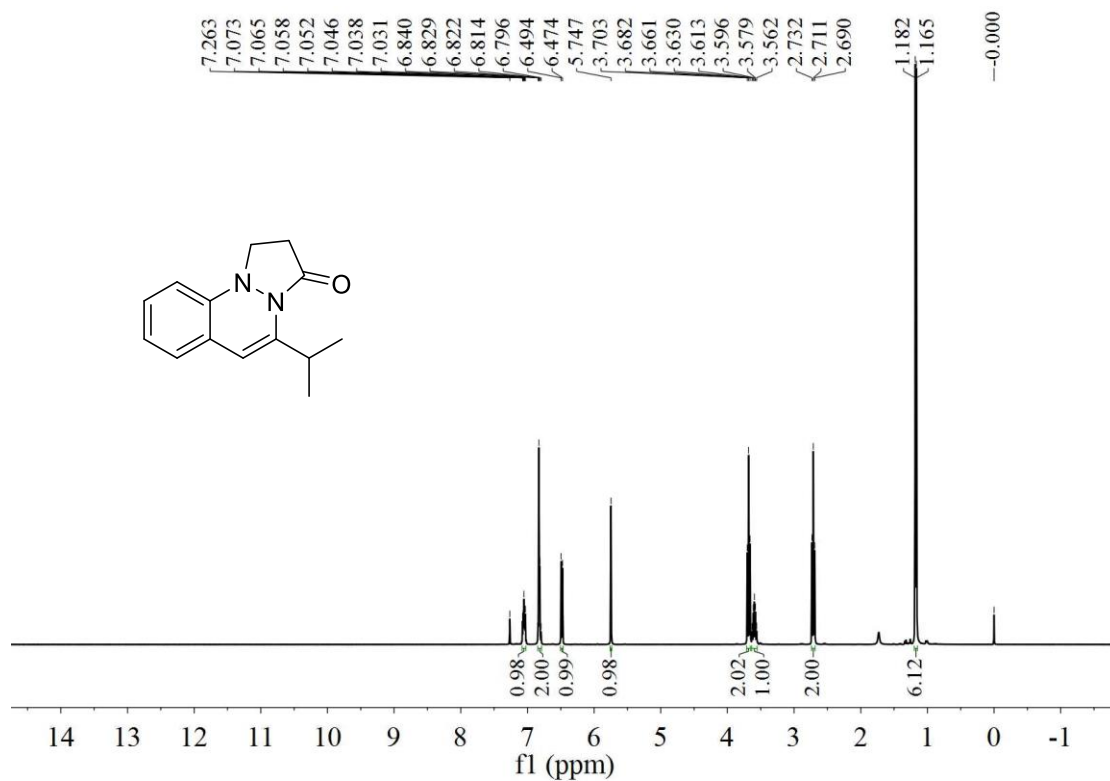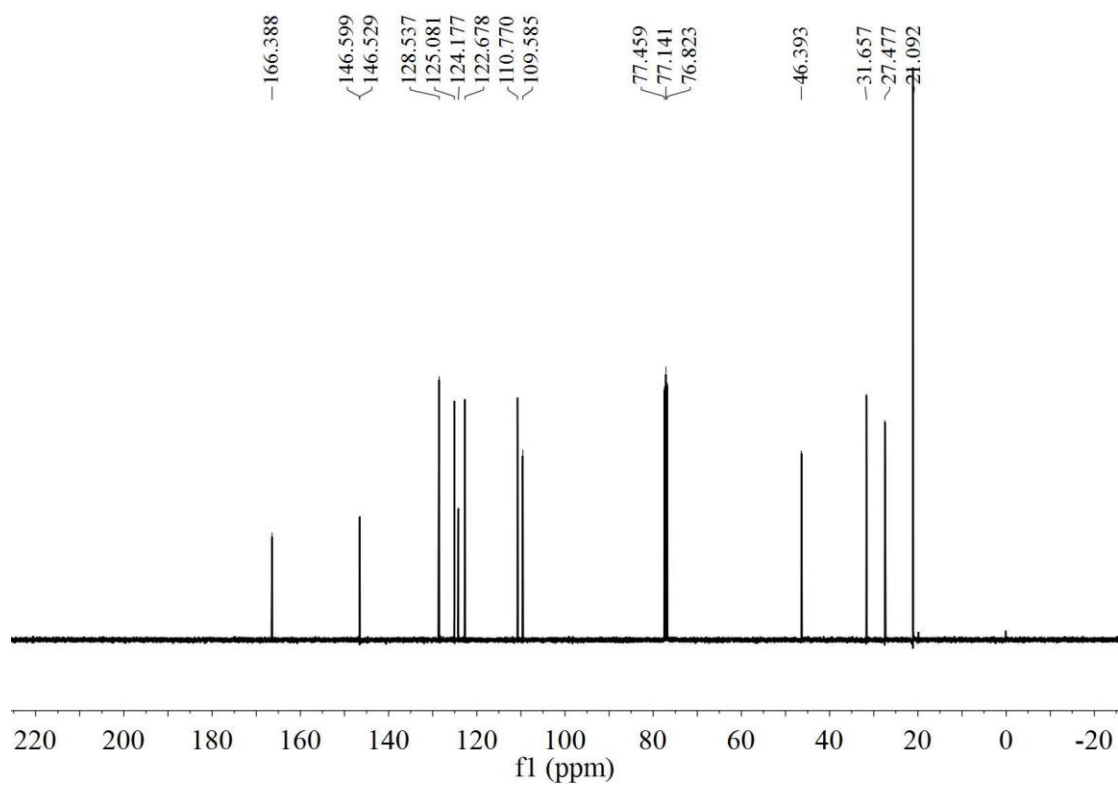

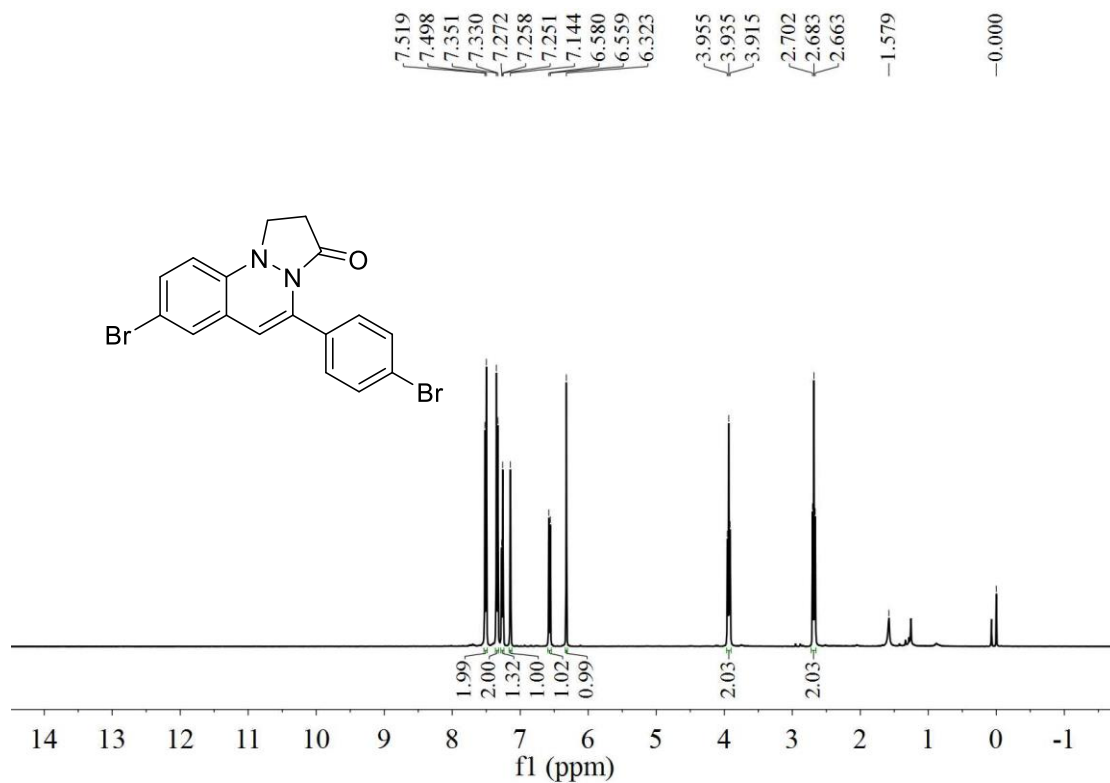

<sup>1</sup>H NMR Spectrum (400 MHz, CDCl<sub>3</sub>) of Compound **3dd**

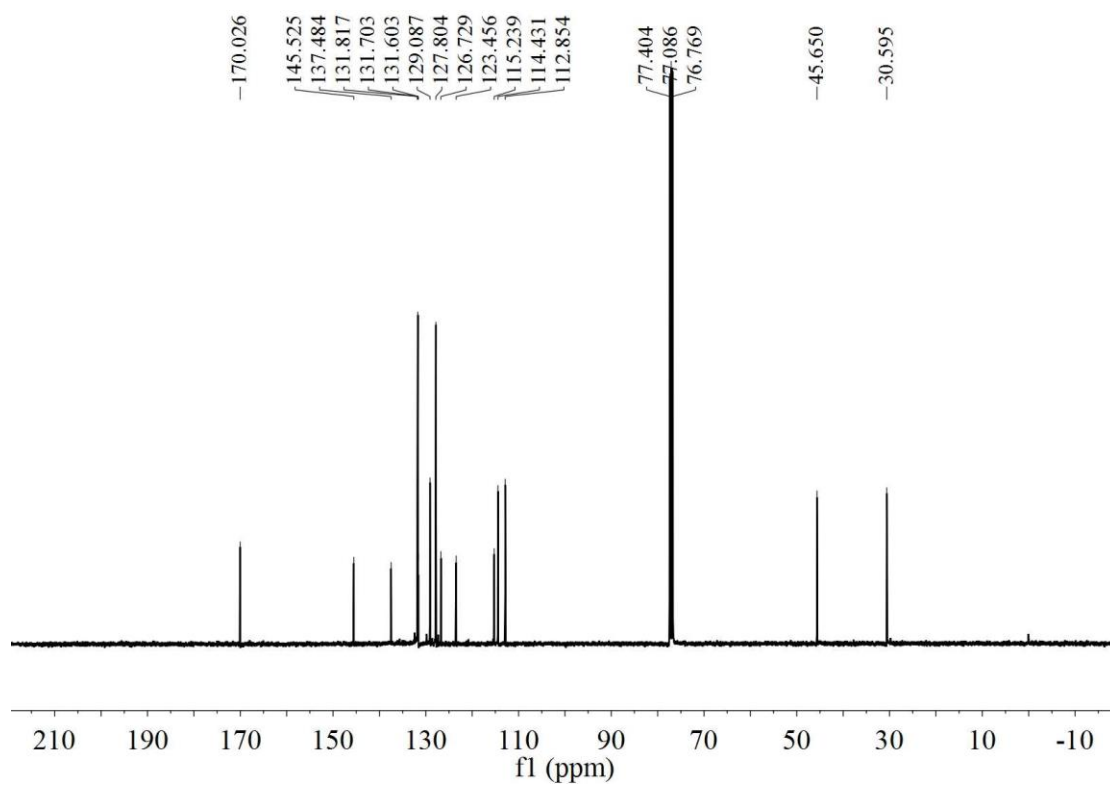

<sup>13</sup>C NMR Spectrum (100 MHz, CDCl<sub>3</sub>) of Compound **3dd**

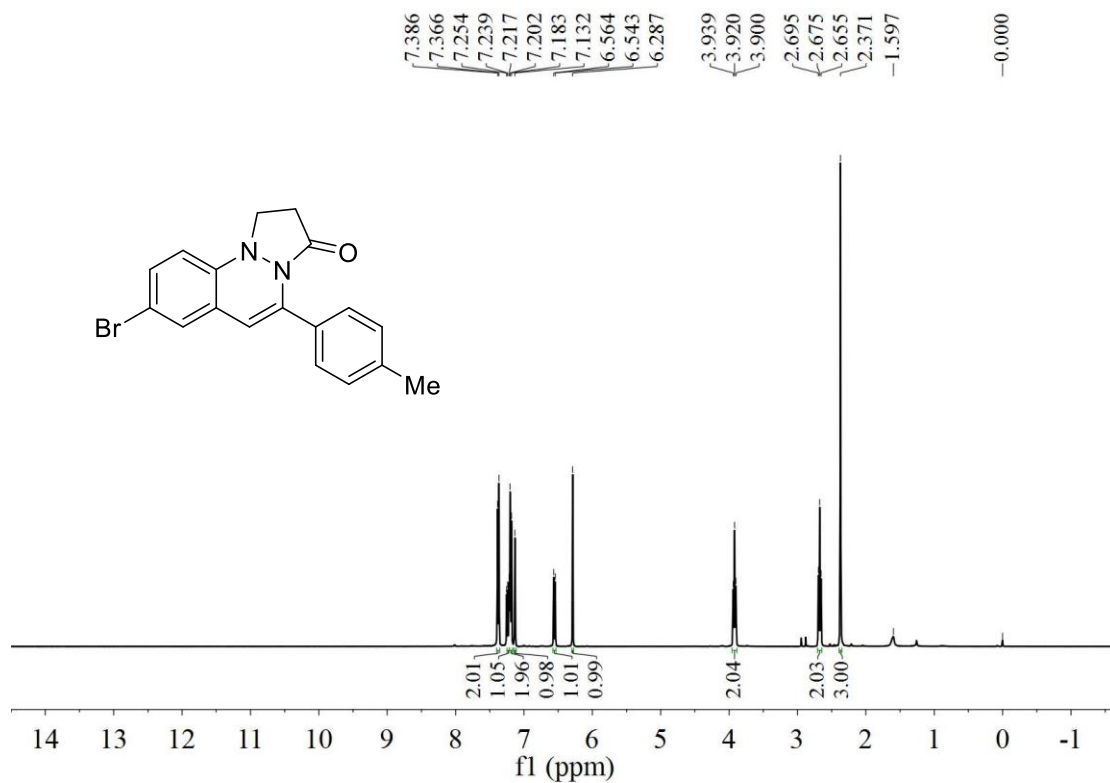

<sup>1</sup>H NMR Spectrum (400 MHz, CDCl<sub>3</sub>) of Compound **3dk**

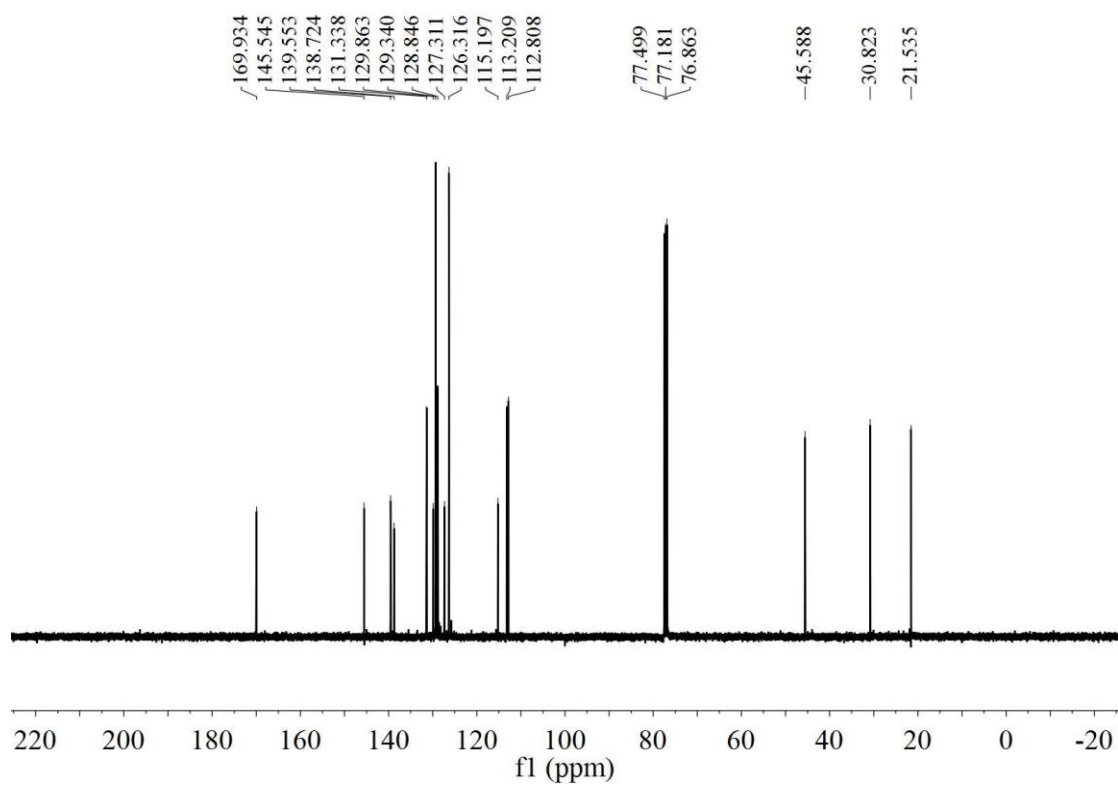

<sup>13</sup>C NMR Spectrum (100 MHz, CDCl<sub>3</sub>) of Compound **3dk**

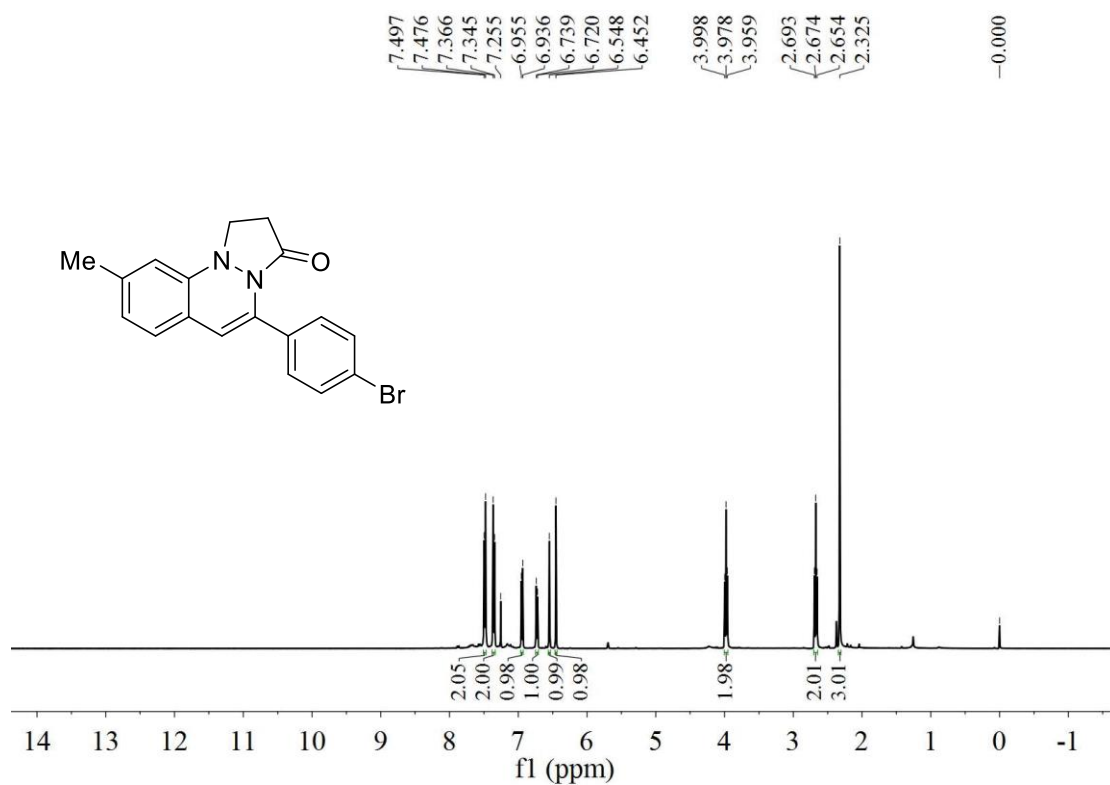

<sup>1</sup>H NMR Spectrum (400 MHz, CDCl<sub>3</sub>) of Compound **3ld**

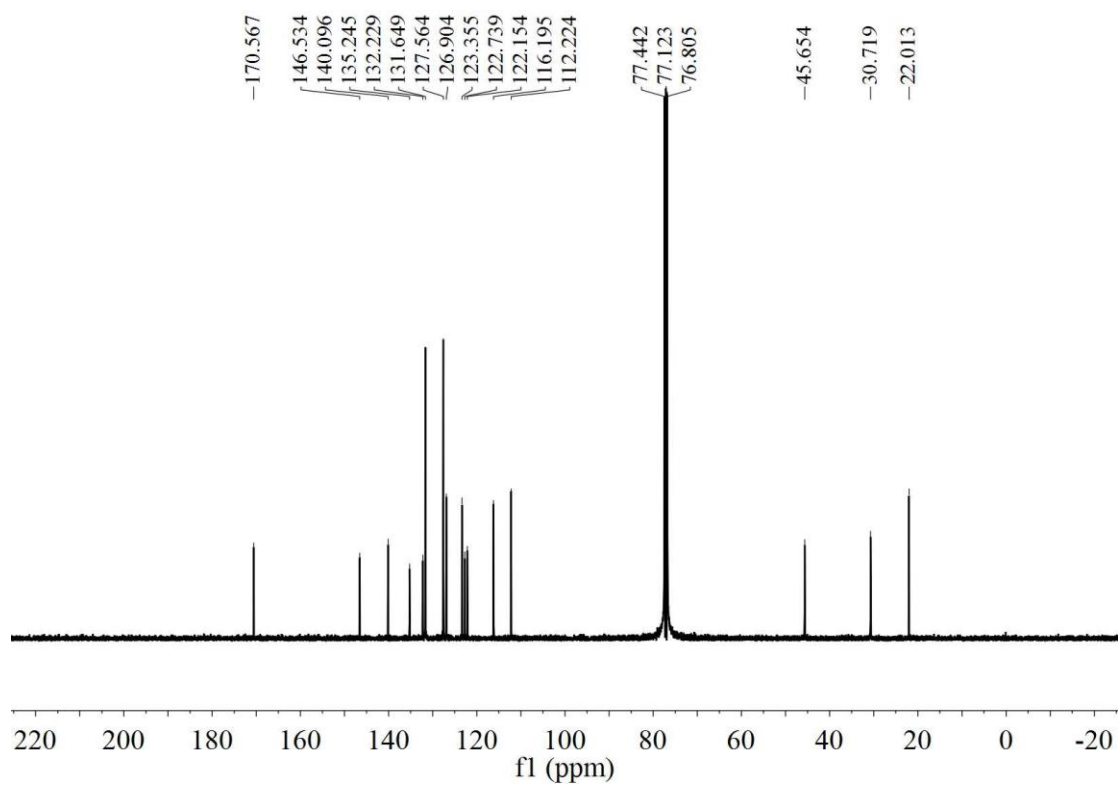

<sup>13</sup>C NMR Spectrum (100 MHz, CDCl<sub>3</sub>) of Compound **3ld**

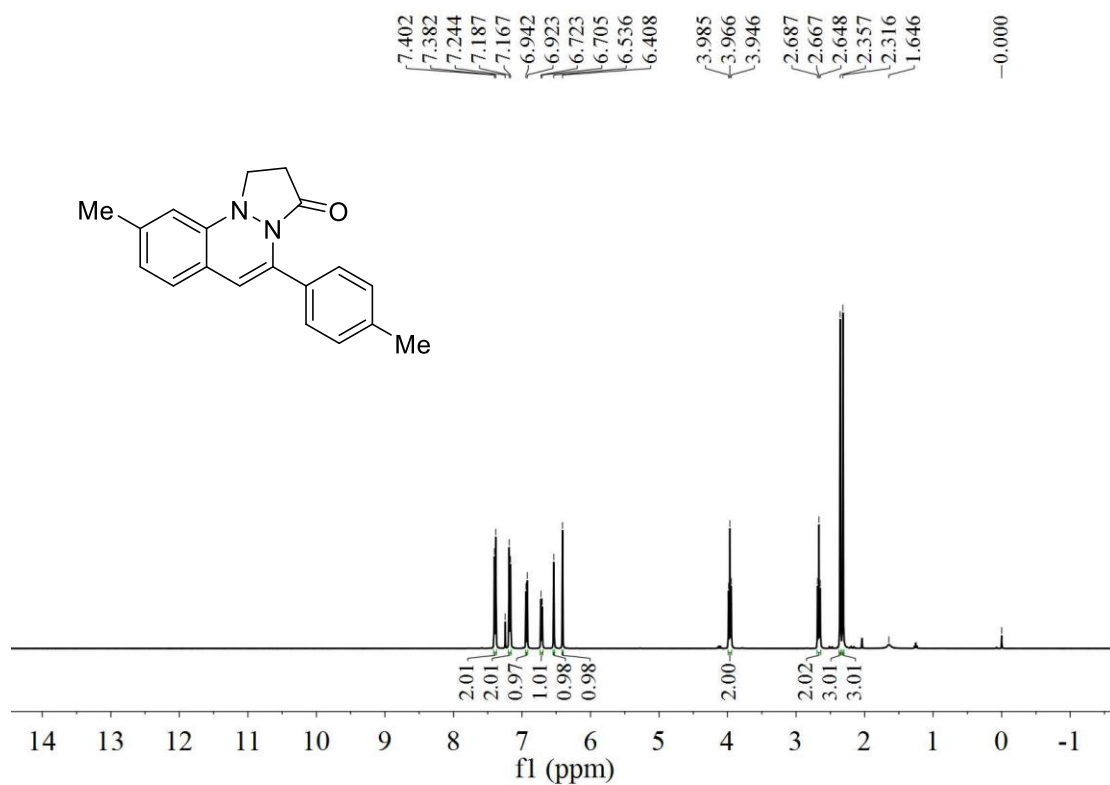

<sup>1</sup>H NMR Spectrum (400 MHz, CDCl<sub>3</sub>) of Compound **3lk**

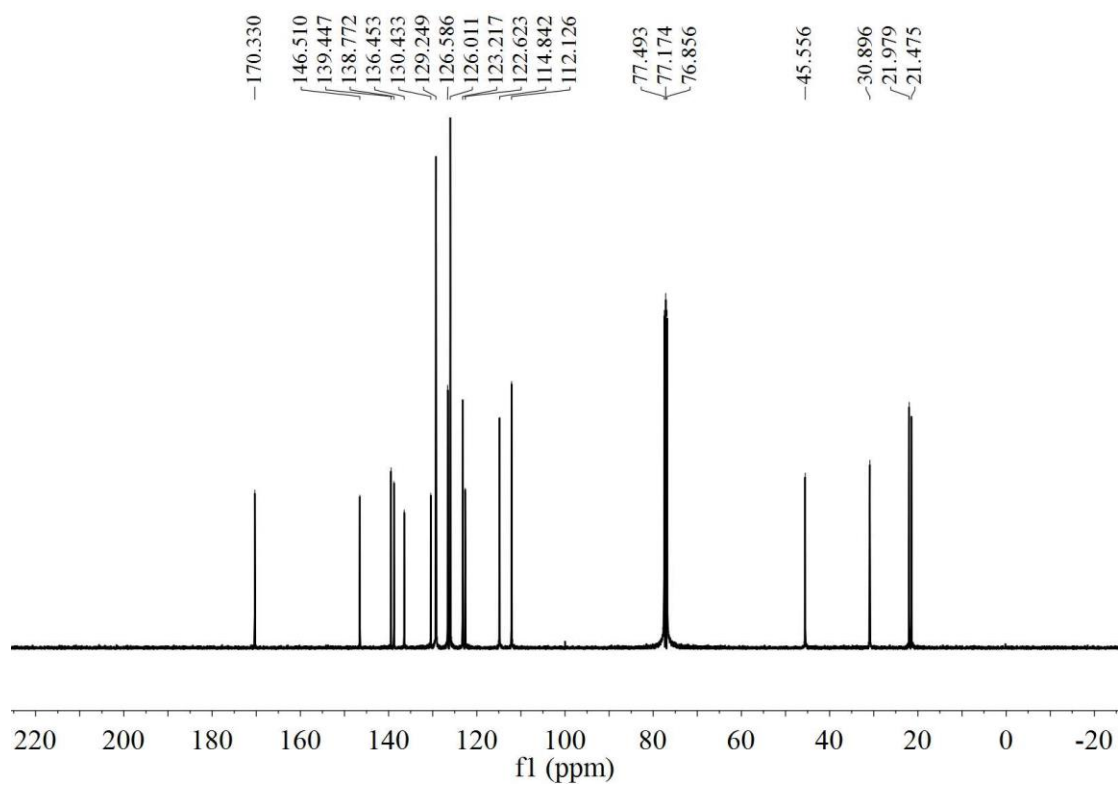

<sup>13</sup>C NMR Spectrum (100 MHz, CDCl<sub>3</sub>) of Compound **3lk**

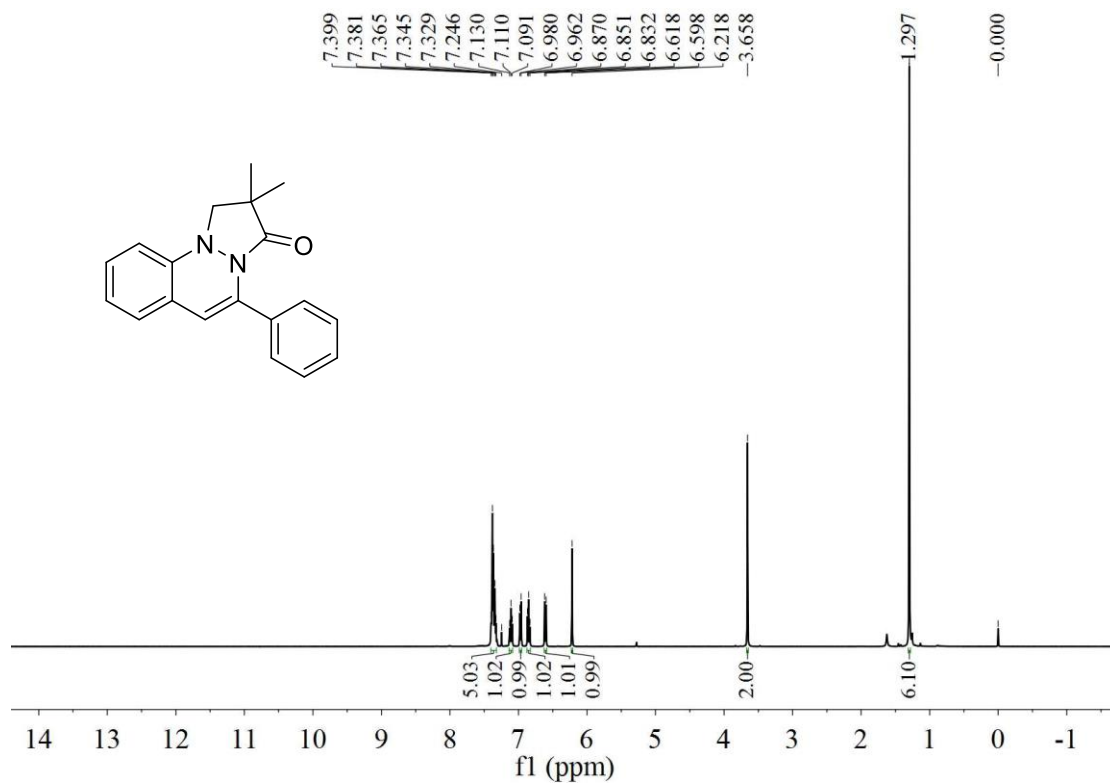

<sup>1</sup>H NMR Spectrum (400 MHz, CDCl<sub>3</sub>) of Compound 30a

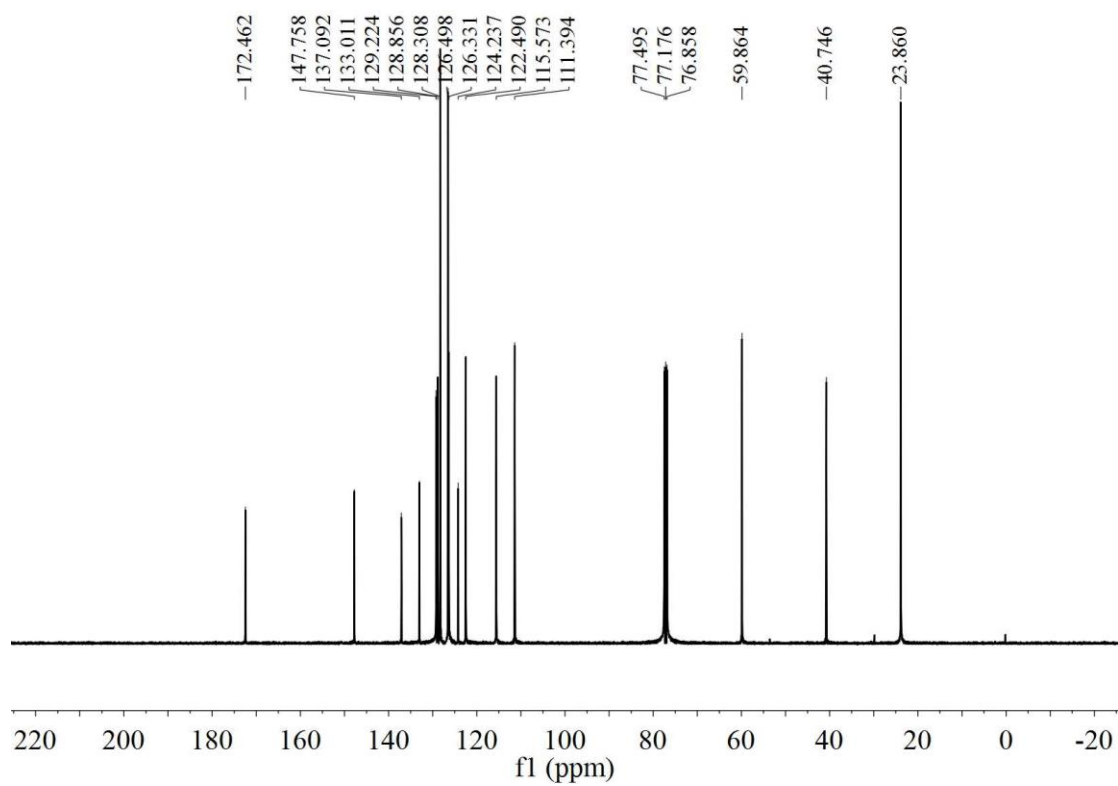

<sup>13</sup>C NMR Spectrum (100 MHz, CDCl<sub>3</sub>) of Compound 30a

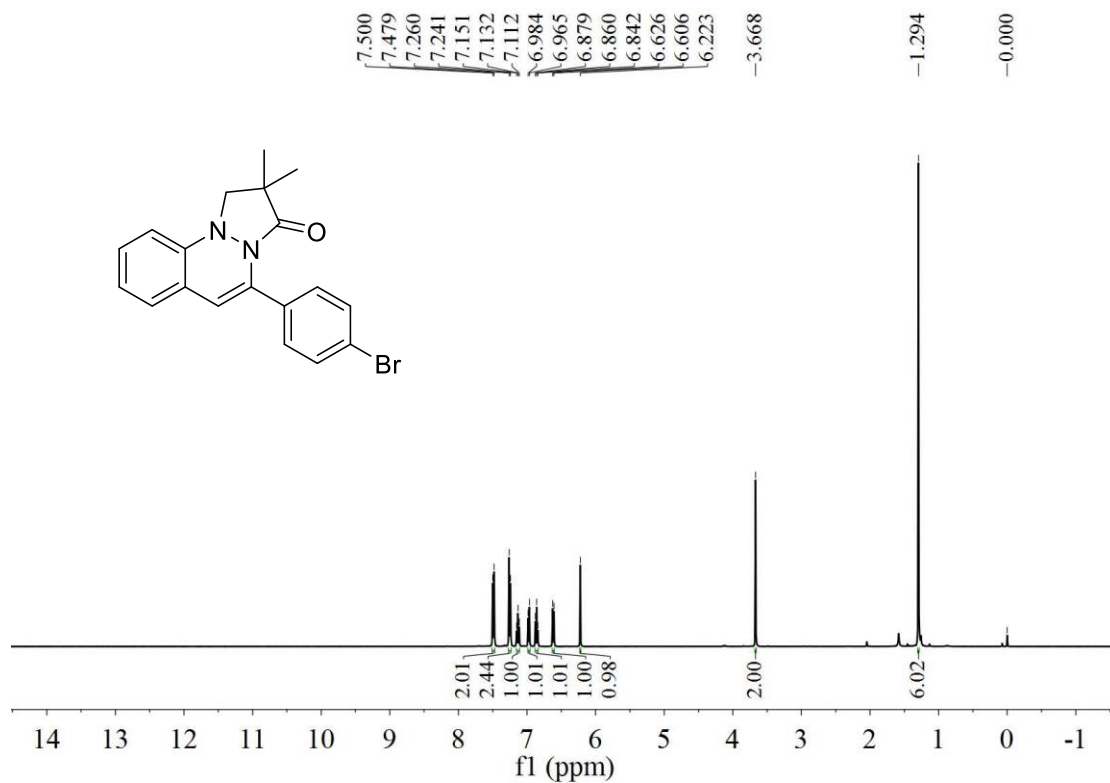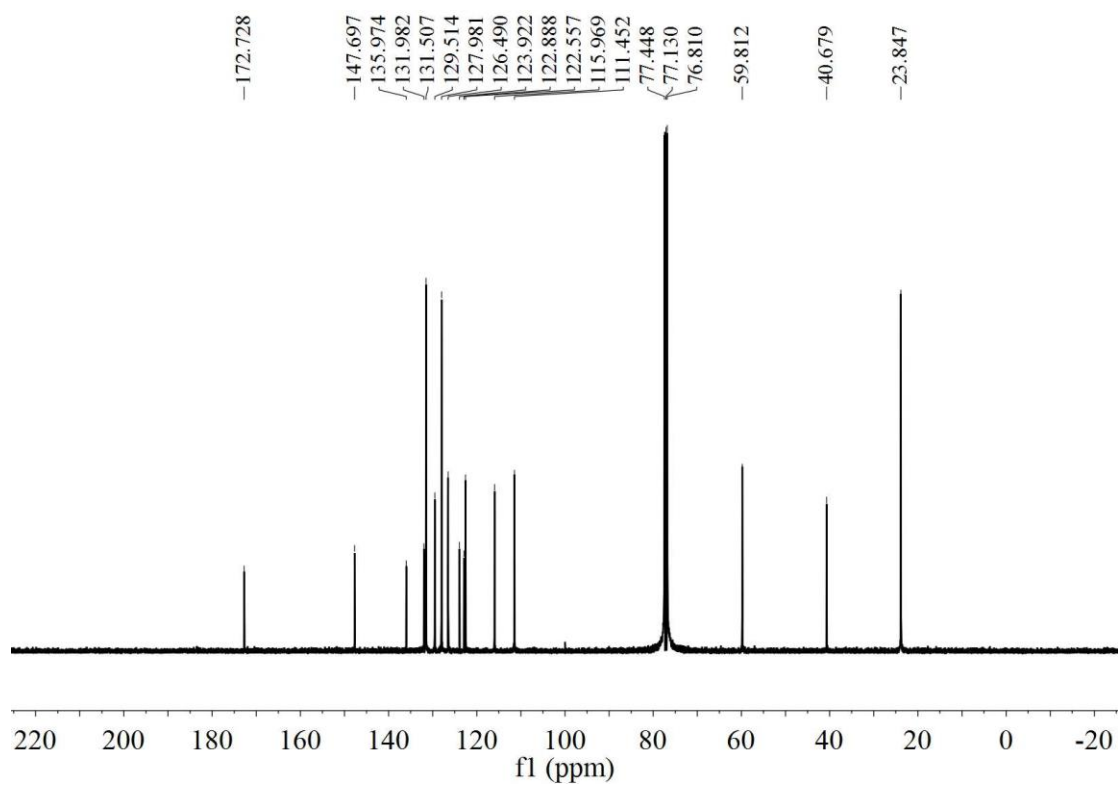

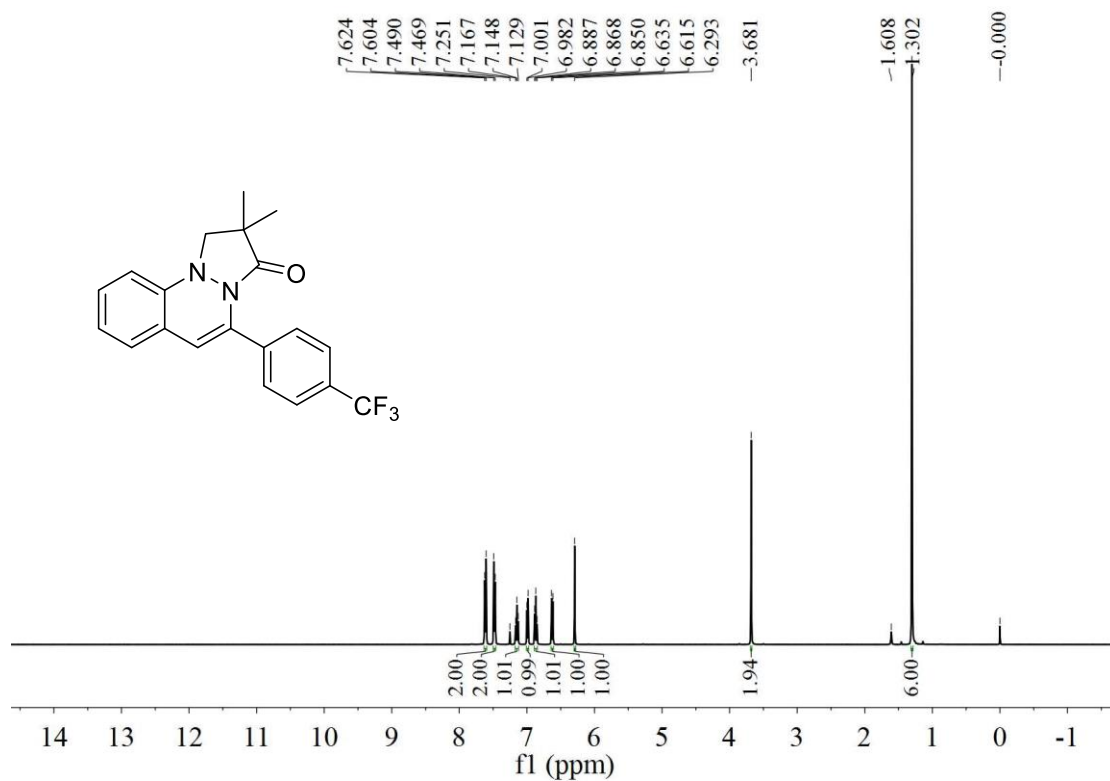

<sup>1</sup>H NMR Spectrum (400 MHz, CDCl<sub>3</sub>) of Compound **3oe**

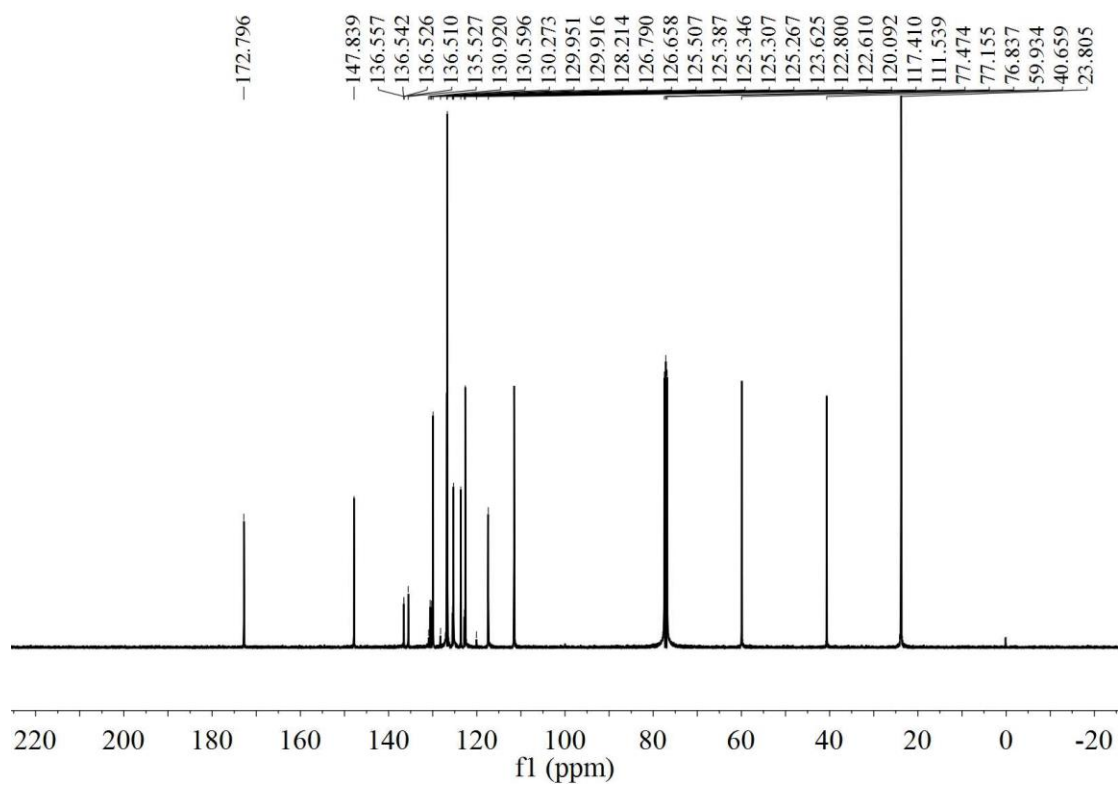

<sup>13</sup>C NMR Spectrum (100 MHz, CDCl<sub>3</sub>) of Compound **3oe**



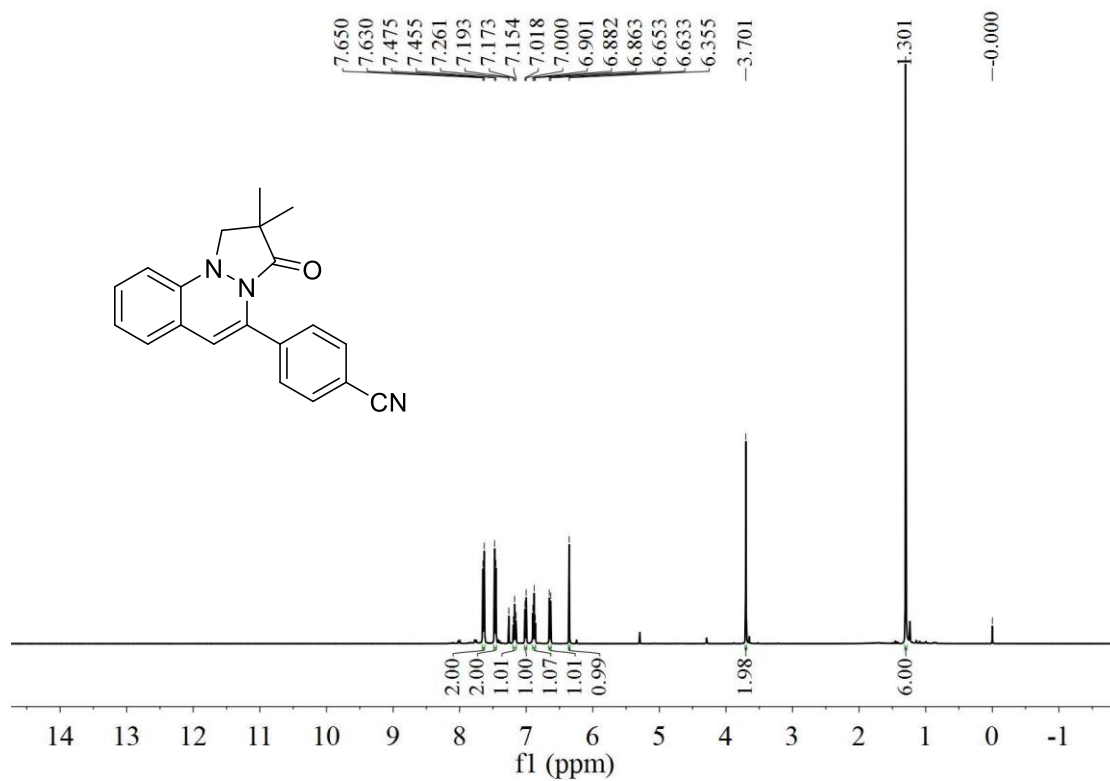

<sup>1</sup>H NMR Spectrum (400 MHz, CDCl<sub>3</sub>) of Compound 3of

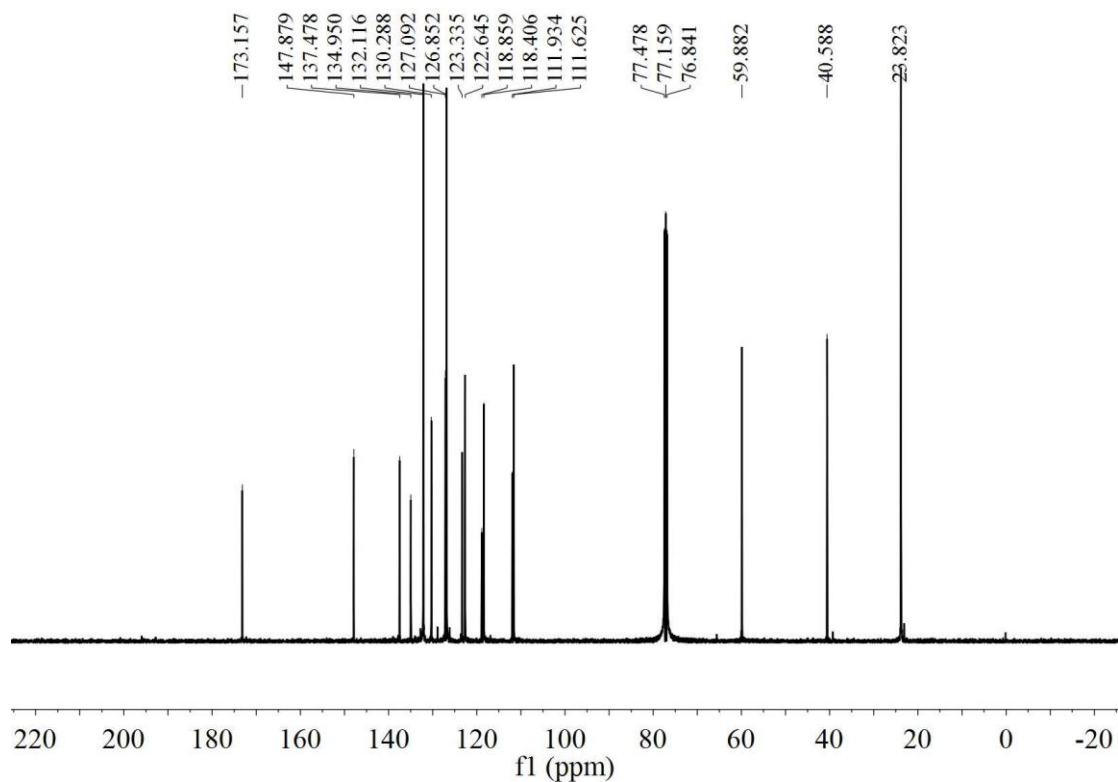

<sup>13</sup>C NMR Spectrum (100 MHz, CDCl<sub>3</sub>) of Compound 3of

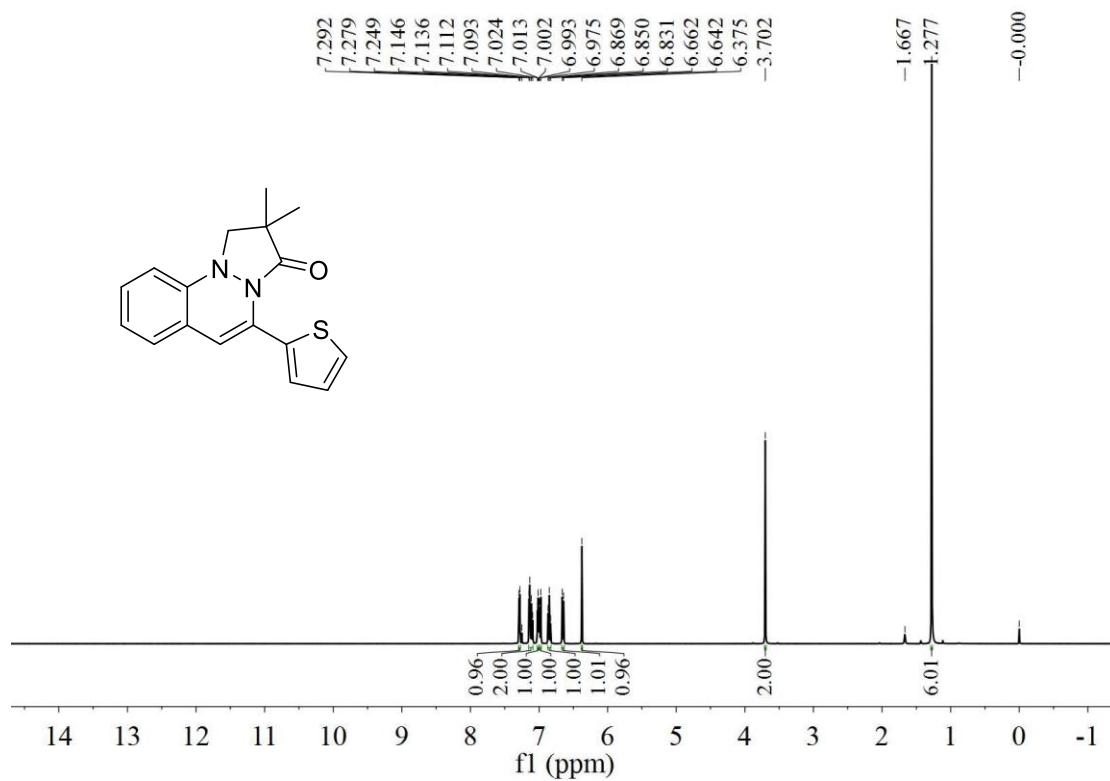

**<sup>1</sup>H NMR Spectrum (400 MHz, CDCl<sub>3</sub>) of Compound 3on**

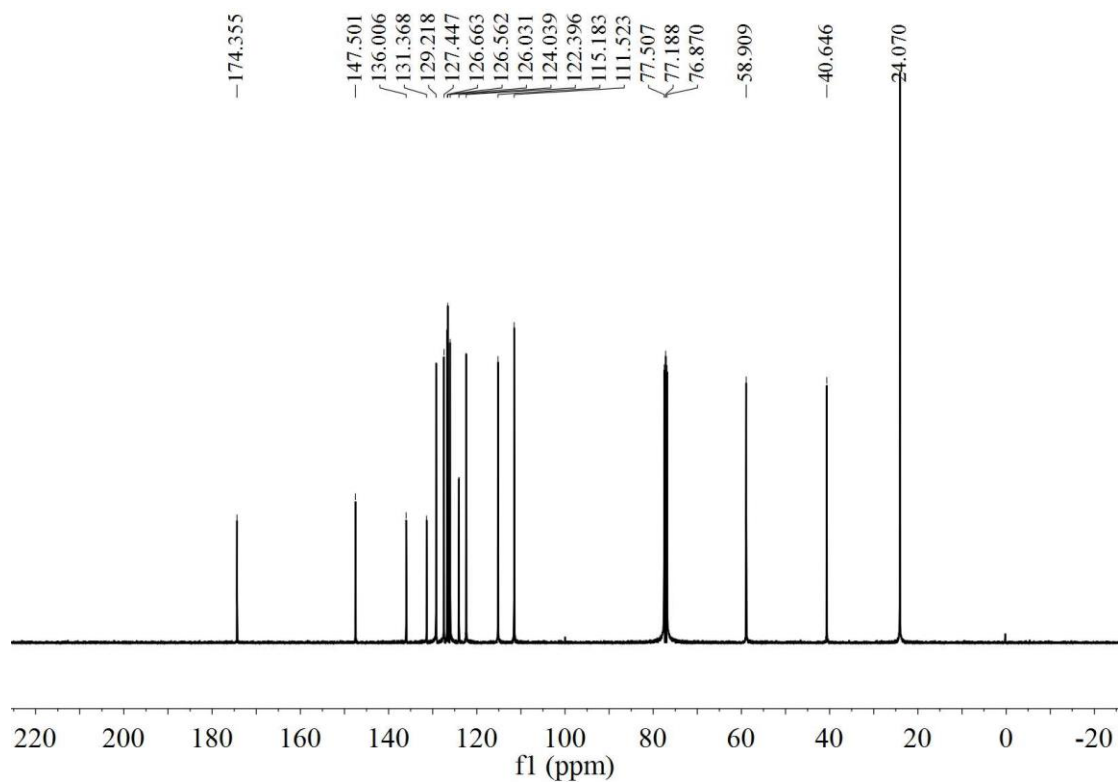

**<sup>13</sup>C NMR Spectrum (100 MHz, CDCl<sub>3</sub>) of Compound 3on**

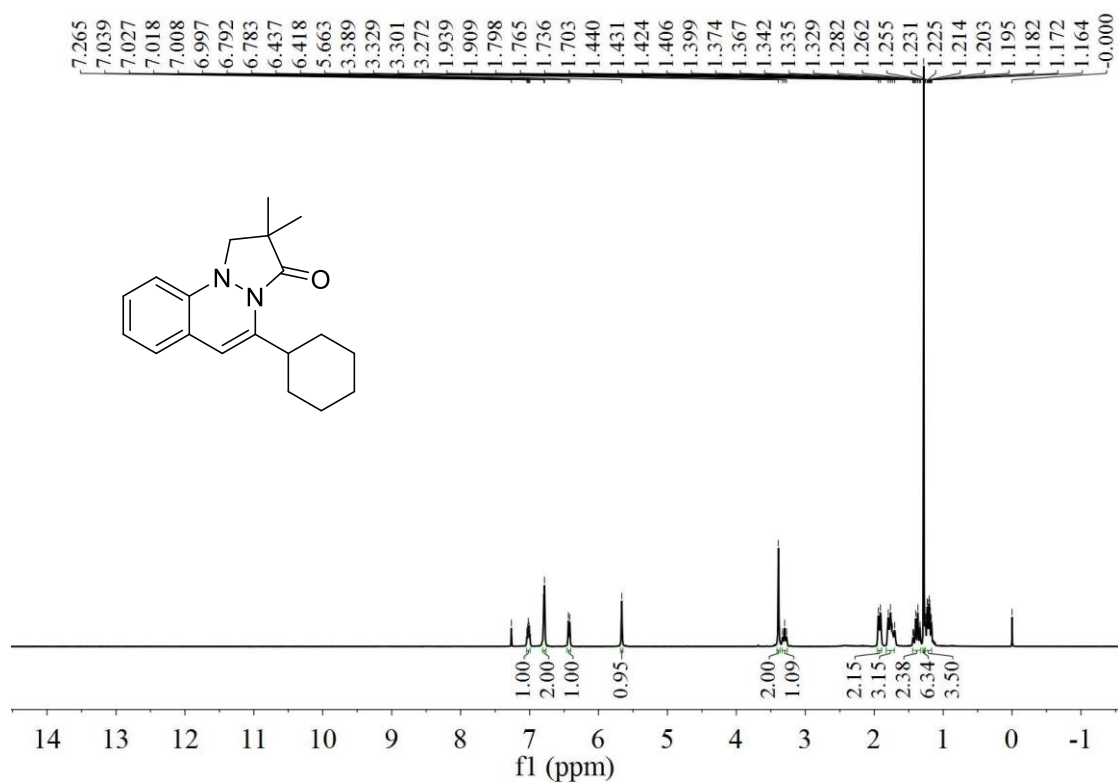

<sup>1</sup>H NMR Spectrum (400 MHz, CDCl<sub>3</sub>) of Compound 300

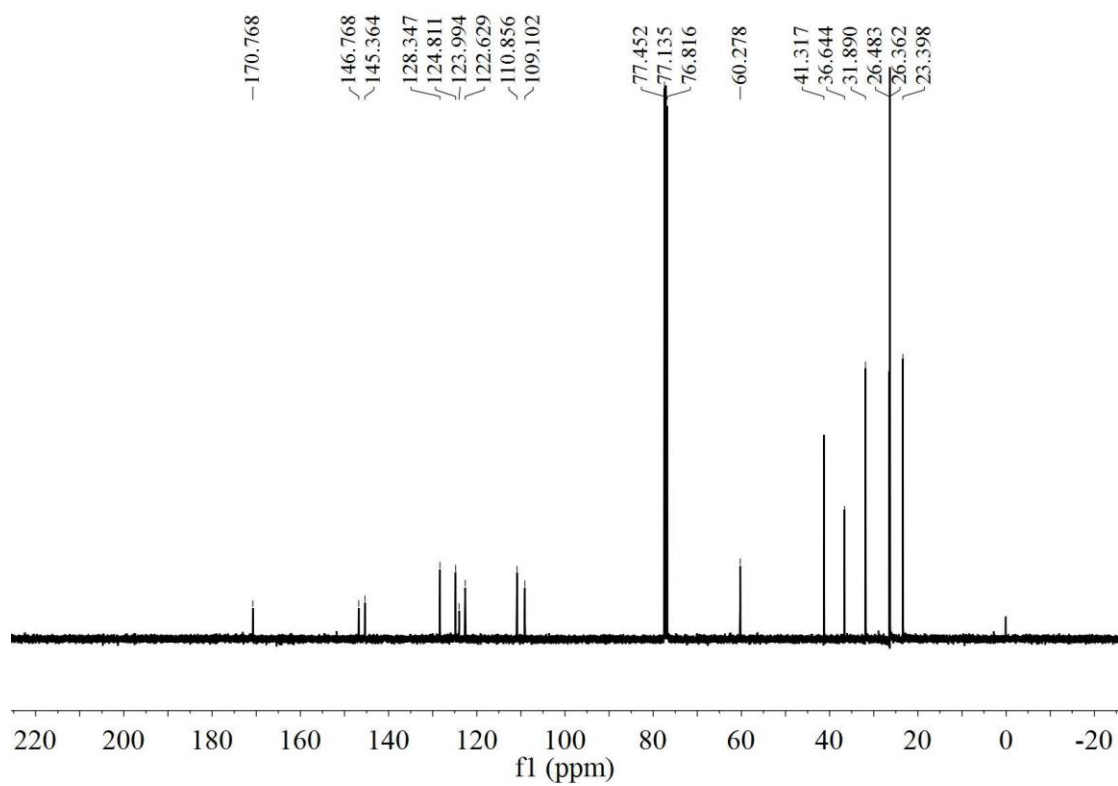

<sup>13</sup>C NMR Spectrum (100 MHz, CDCl<sub>3</sub>) of Compound 300

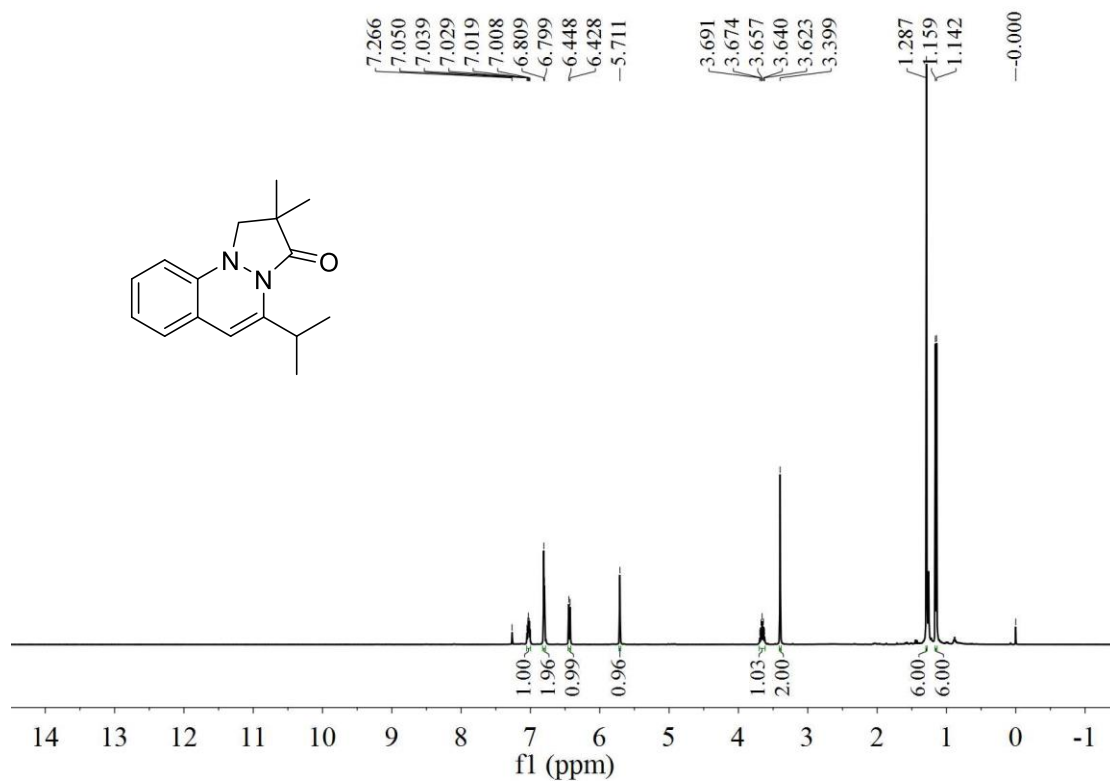

**<sup>1</sup>H NMR Spectrum (400 MHz, CDCl<sub>3</sub>) of Compound 3op**

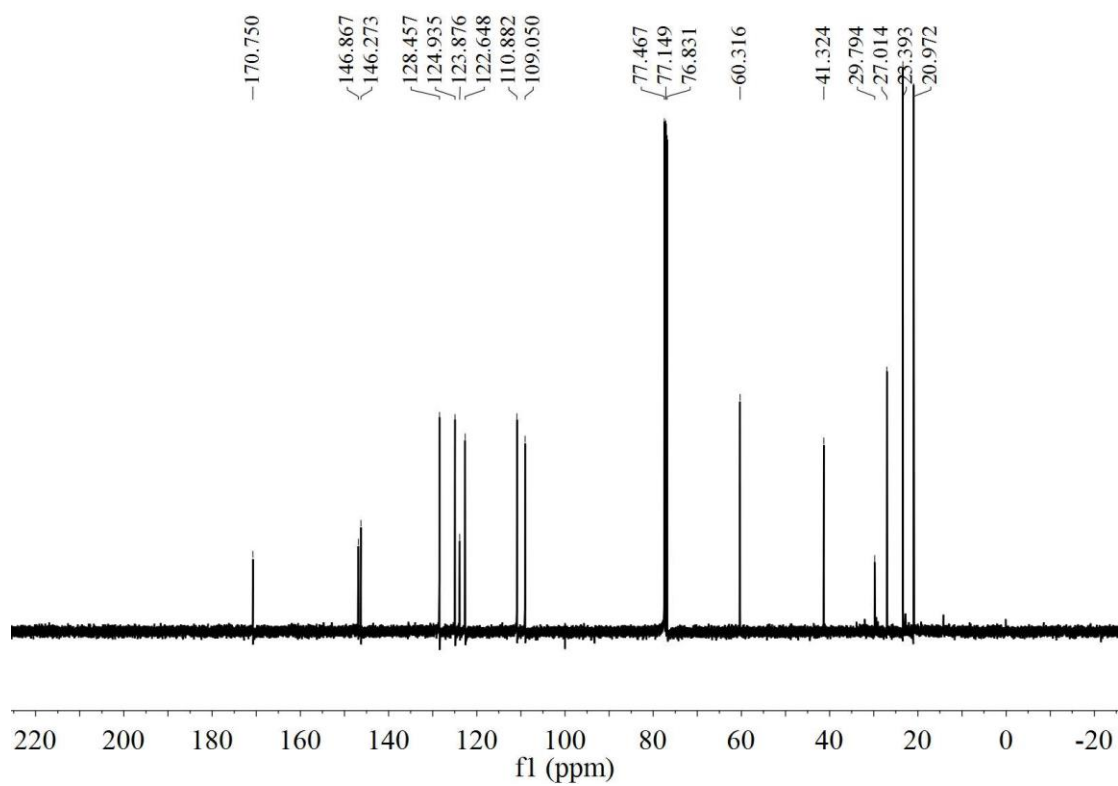

**<sup>13</sup>C NMR Spectrum (100 MHz, CDCl<sub>3</sub>) of Compound 3op**

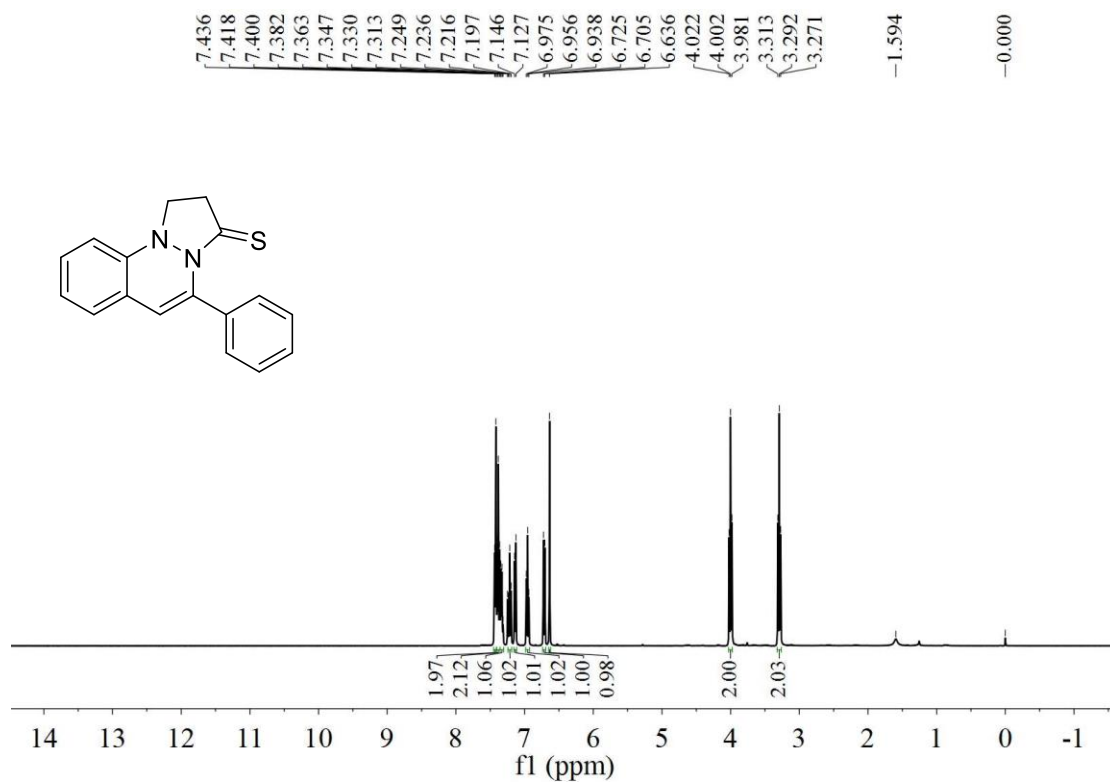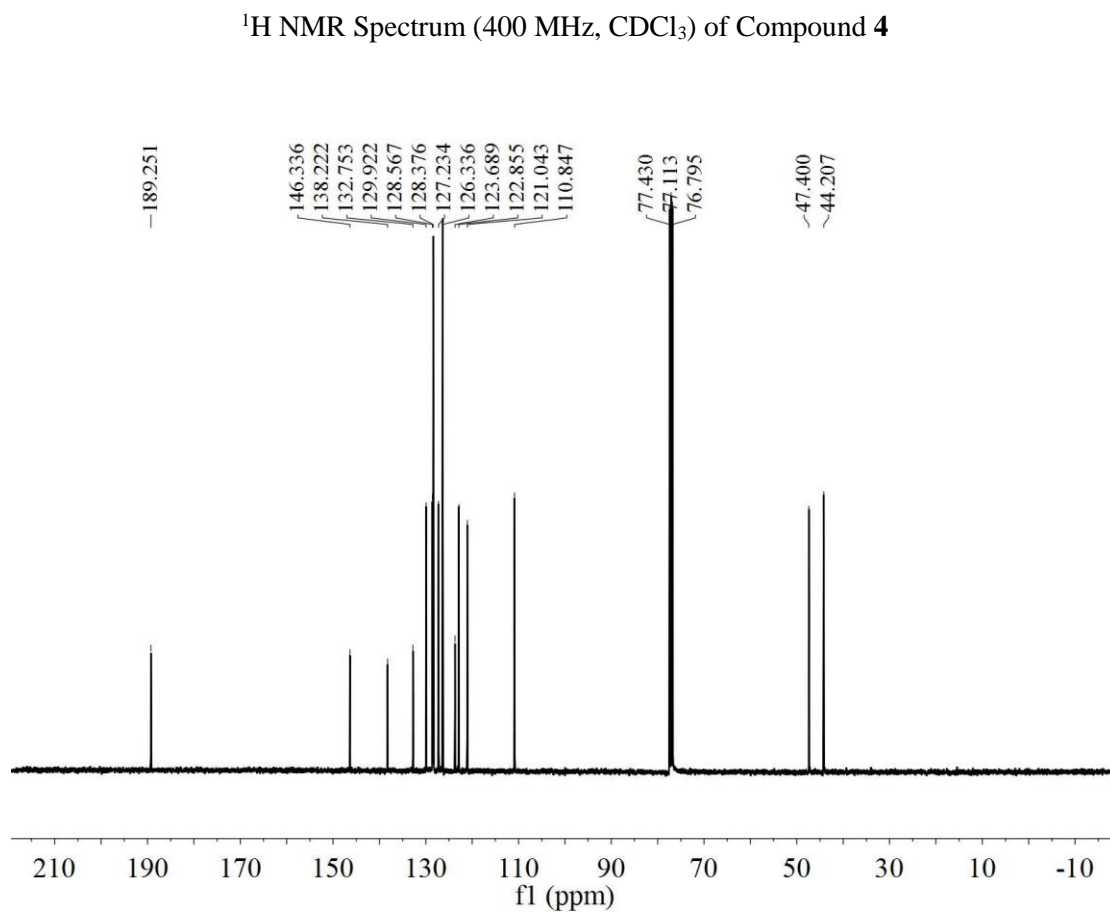

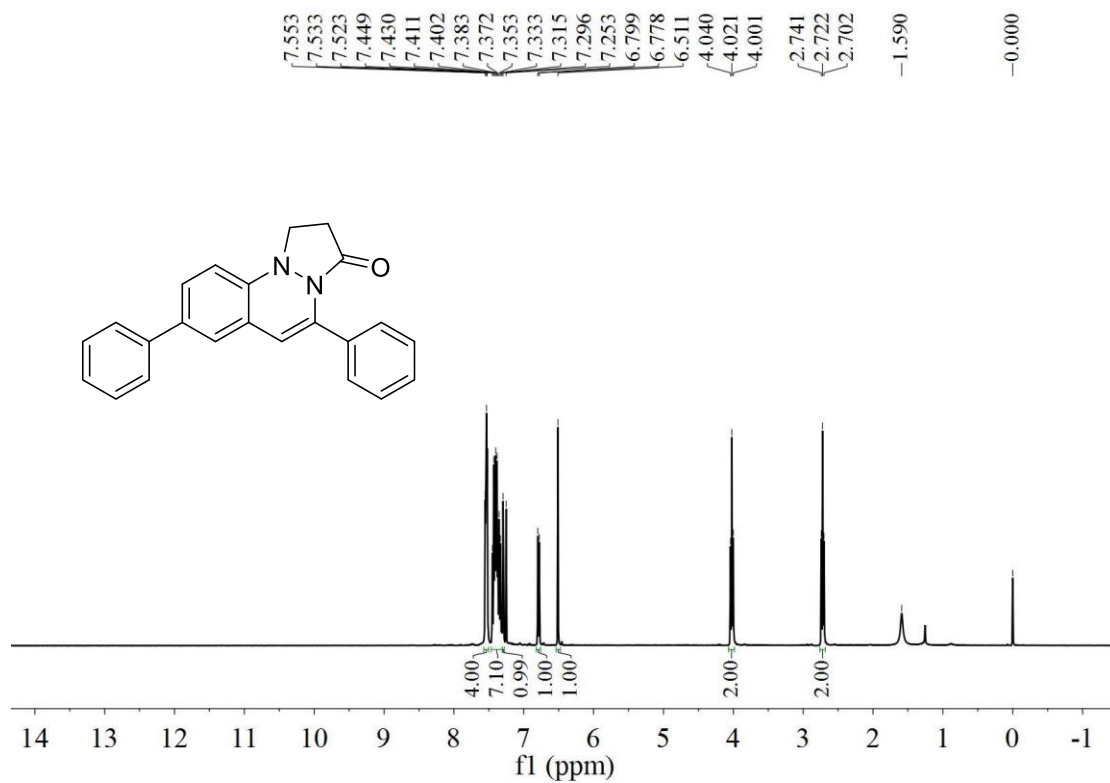

<sup>1</sup>H NMR Spectrum (400 MHz, CDCl<sub>3</sub>) of Compound 5

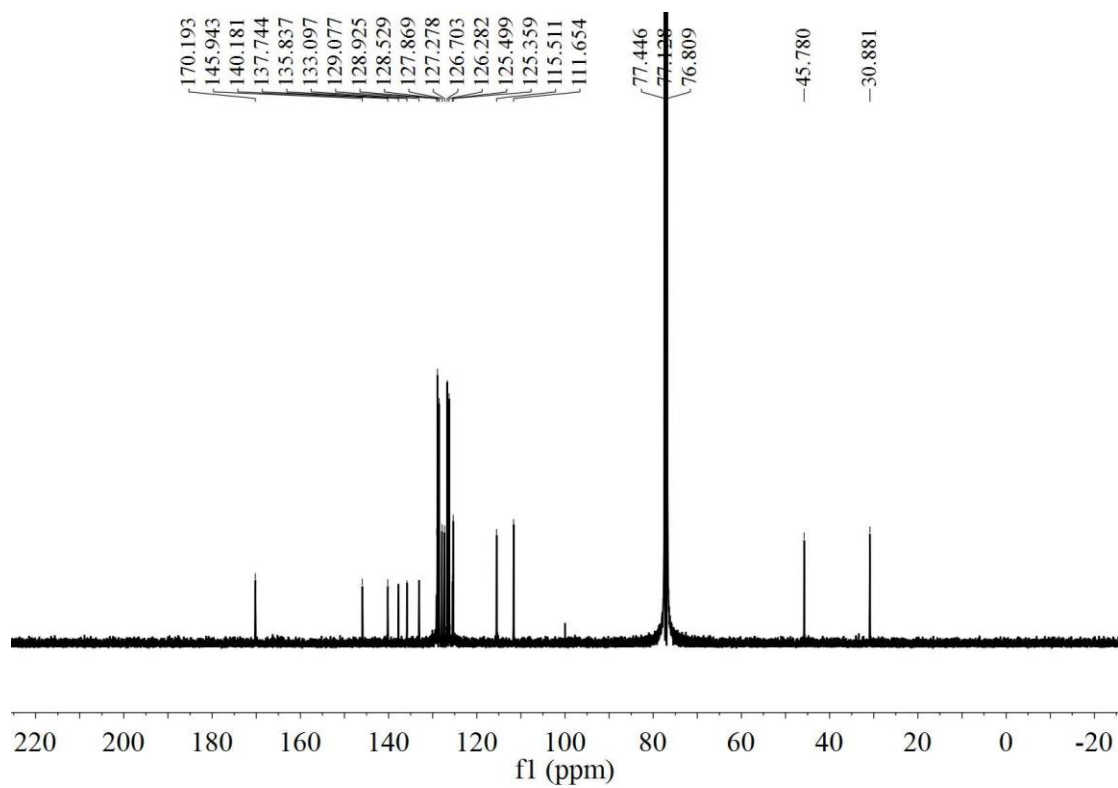

<sup>13</sup>C NMR Spectrum (100 MHz, CDCl<sub>3</sub>) of Compound 5

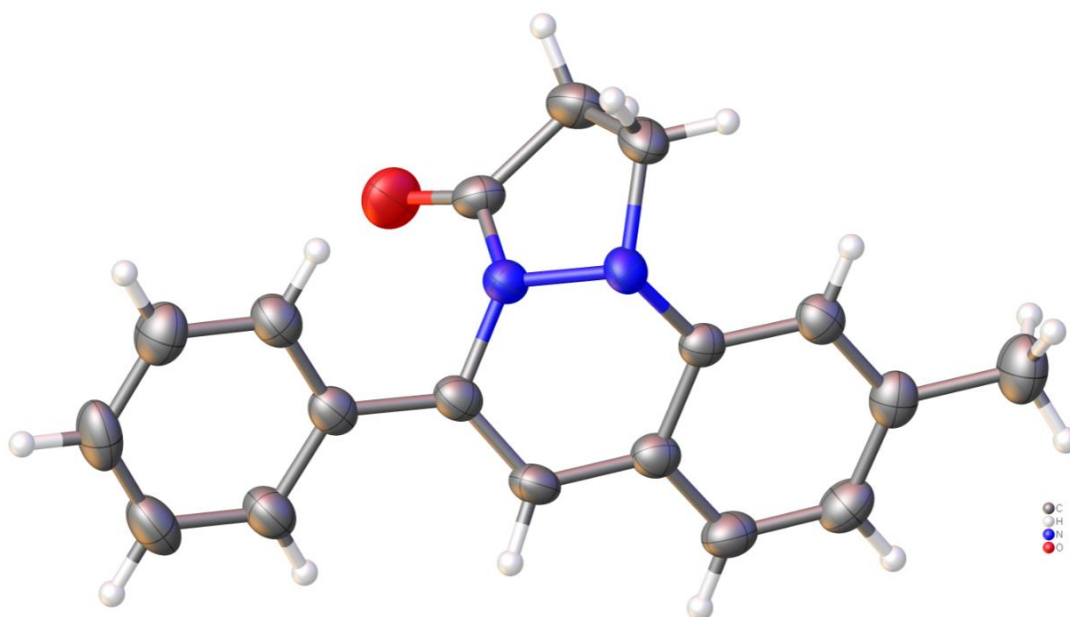

**Figure S1.** Crystal structure of **3la** (35% probability level for the thermal ellipsoids).

**Table S1.** Crystal Data for Compound **3la**

|                                        |                                                                                                                                                 |
|----------------------------------------|-------------------------------------------------------------------------------------------------------------------------------------------------|
| Formula                                | C <sub>18</sub> H <sub>16</sub> N <sub>2</sub> O                                                                                                |
| Formula weight                         | 276.33                                                                                                                                          |
| Temperature                            | 293 (2) K                                                                                                                                       |
| Wavelength                             | 0.71000 Å                                                                                                                                       |
| Crystal system                         | triclinic                                                                                                                                       |
| Space group                            | P1                                                                                                                                              |
| Unit cell dimensions                   | $a = 5.8988(4)$ Å, $\alpha = 106.781(6)$ deg.<br>$b = 11.1914(8)$ Å, $\beta = 101.292(6)$ deg.<br>$c = 11.6421(8)$ Å, $\gamma = 96.496(6)$ deg. |
| Volume                                 | 709.71(9) Å <sup>3</sup>                                                                                                                        |
| Z                                      | 4                                                                                                                                               |
| Density (calculated)                   | 1.293 g / cm <sup>3</sup>                                                                                                                       |
| Absorption coefficient                 | 0.081 mm <sup>-1</sup>                                                                                                                          |
| $F(000)$                               | 292.0                                                                                                                                           |
| Crystal                                | 0.27 x 0.19 x 0.15 mm                                                                                                                           |
| Theta range for data collection        | 7.154 to 58.19 deg                                                                                                                              |
| Limiting indices                       | $-7 \leq h \leq 7$ , $-13 \leq k \leq 9$ , $-13 \leq l \leq 15$                                                                                 |
| Reflections collected                  | 5511                                                                                                                                            |
| Independent reflections                | 4066 [R(int) = 0.0241]                                                                                                                          |
| Data / restraints / parameters         | 4066 / 3 / 381                                                                                                                                  |
| Goodness-of-fit on $F^2$               | 1.045                                                                                                                                           |
| Final $R$ indices [ $I > 2\sigma(I)$ ] | $R_1 = 0.0450$ , $wR_2 = 0.0992$                                                                                                                |
| $R$ indices (all data)                 | $R_1 = 0.0529$ , $wR_2 = 0.1046$                                                                                                                |
| Largest diff. peak and hole            | 0.18 and -0.23 e. Å <sup>-3</sup>                                                                                                               |
